# Supplementary material
Source: PubMed Central journal article supplement (PMC10113999)
Supplement: 41573_2023_672_MOESM1_ESM.pdf [file 41573_2023_672_MOESM1_ESM.pdf]

---

# Therapeutic strategies for COVID-19: progress and lessons learned

---

In the format provided by the  
authors and unedited

## Table of Contents

|                                                                                   |    |
|-----------------------------------------------------------------------------------|----|
| Figure S1: SARS-CoV-2 papain-like protease and its drug-binding pocket.....       | 2  |
| Figure S2: Structures of NSP13 and its drug-binding pockets.....                  | 3  |
| Figure S3: Structures of NSP14 and its drug-binding pockets.....                  | 4  |
| Figure S4: Structures of NSP15 and its drug-binding pockets.....                  | 5  |
| Figure S5: Structures of NSP16/NSP10 and its drug-binding pockets .....           | 6  |
| Figure S6: Structures of nucleocapsid and its drug-binding pockets.....           | 7  |
| <br>                                                                              |    |
| Our data collection procedure.....                                                | 8  |
| Table S1: Summary of virus-targeted inhibitors with anti-SARS-CoV-2 activity .... | 9  |
| Table S2: Summary of anti-spike antibodies against SARS-CoV-2.....                | 26 |
| Table S3: Summary of host-targeted agents against SARS-CoV-2.....                 | 47 |
| Table S4: Repurposed drugs with limited clinical benefits for COVID-19 patients   | 54 |
| Table S5: Summary of FDA-approved cytokine antagonists .....                      | 63 |
| References.....                                                                   | 64 |

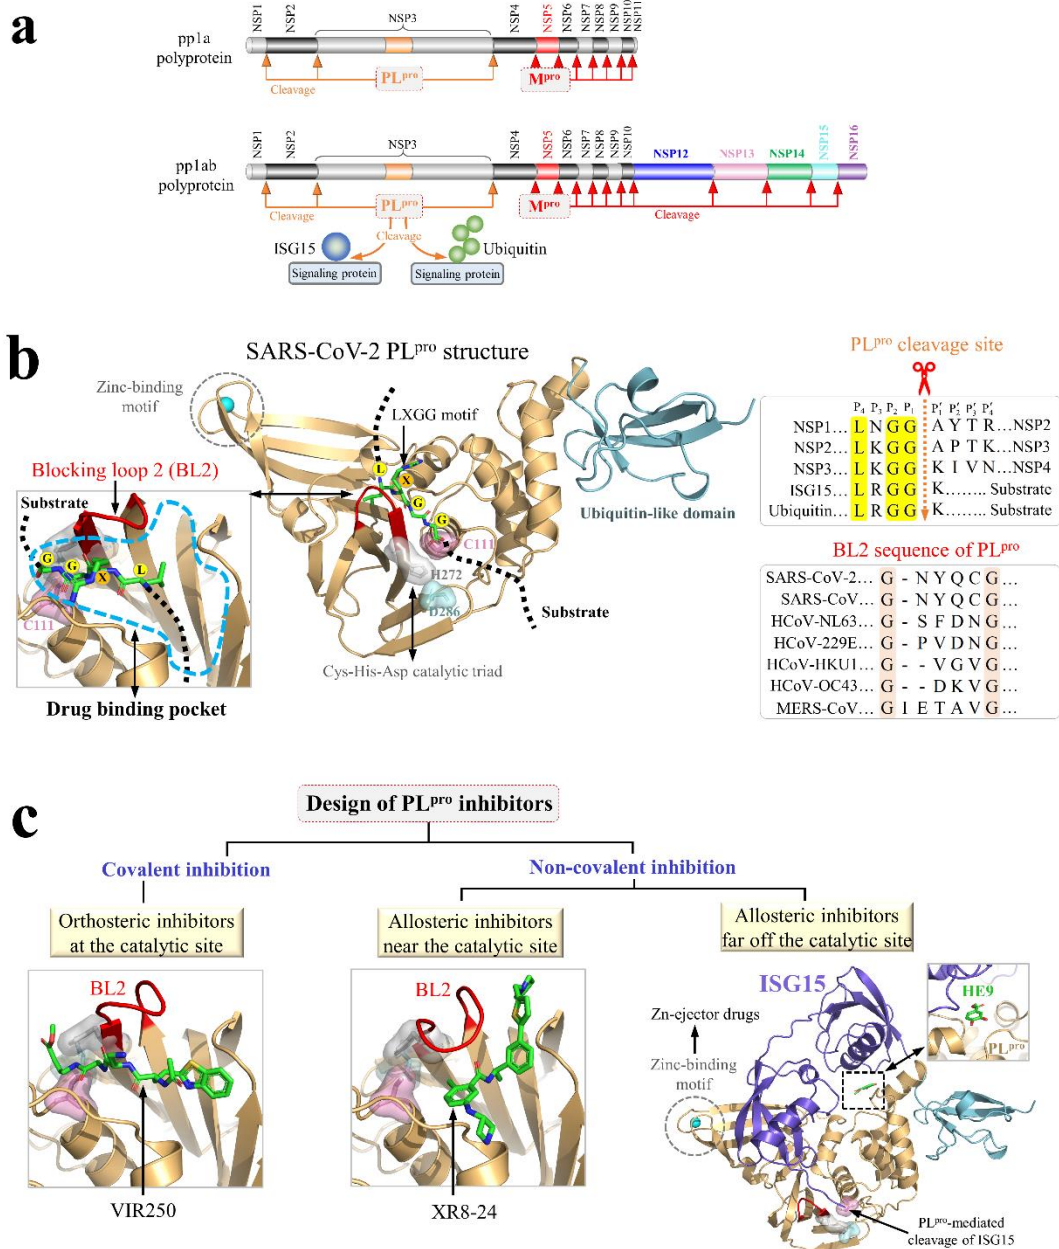

**Fig. S1 | SARS-CoV-2 papain-like protease and its drug-binding pocket**

**a**, Cleavage sites of papain-like protease (PL<sup>pro</sup>) and main protease (M<sup>pro</sup>) in the pp1a and pp1ab polyproteins. PL<sup>pro</sup> also cleaves the C-terminal tails of ISG15 and ubiquitin to remove them from signaling proteins, thus suppressing innate immune responses [1].

**b**, Protein structure of SARS-CoV-2 PL<sup>pro</sup> (PDB: 7RBS). The substrate motif LRGG is located at the active site with the catalytic triad (Cys111–His272–Asp286). The structure of blocking loop 2 (BL2) is visualized in red. PL<sup>pro</sup> cleavage site sequences and BL2 sequences from reference genomes are shown in boxes on the right.

**c**, Three classes of PL<sup>pro</sup> inhibitors and drug-binding pockets of VIR250 (PDB: 6WUU), XR8-24 (PDB: 7LBS), HE9 (PDB: 7OFU). HE9 targets an allosteric pocket to block

binding of PL<sup>pro</sup> with ISG15 [2].

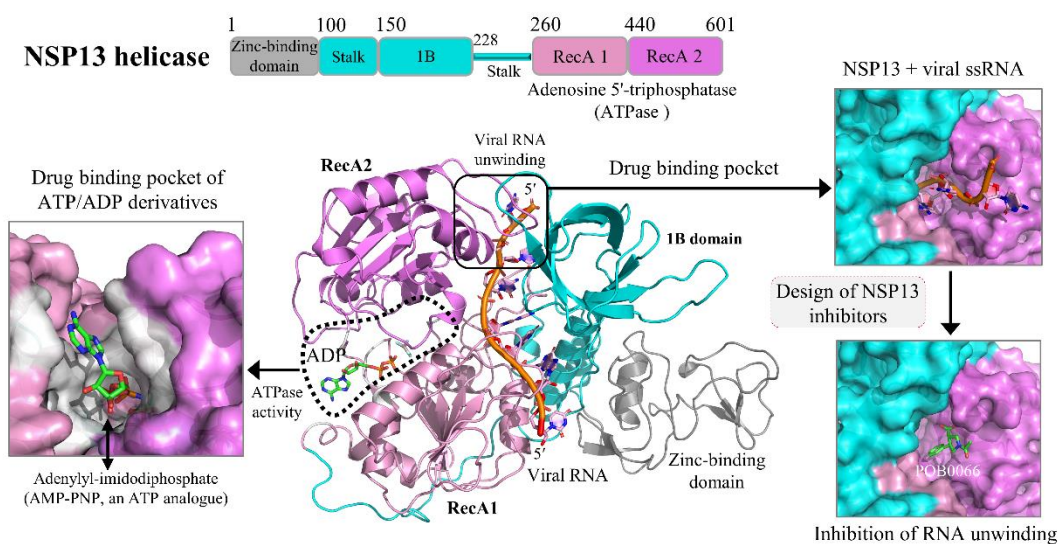

**Fig. S2 | Structures of NSP13 and its drug-binding pockets**

Functional domains of NSP13 helicase (PDB: 7RDY). One drug-binding pocket is located within the ATP/ADP-binding site where adenylyl-imidodiphosphate, a nonhydrolyzable ATP analogue, blocks the ATP/ADP-binding site (PDB: 7NN0). The other is located within the RNA-binding site, where the experimental inhibitor POB0066 blocks the entry of viral ssRNA (PDB: 5RMM).

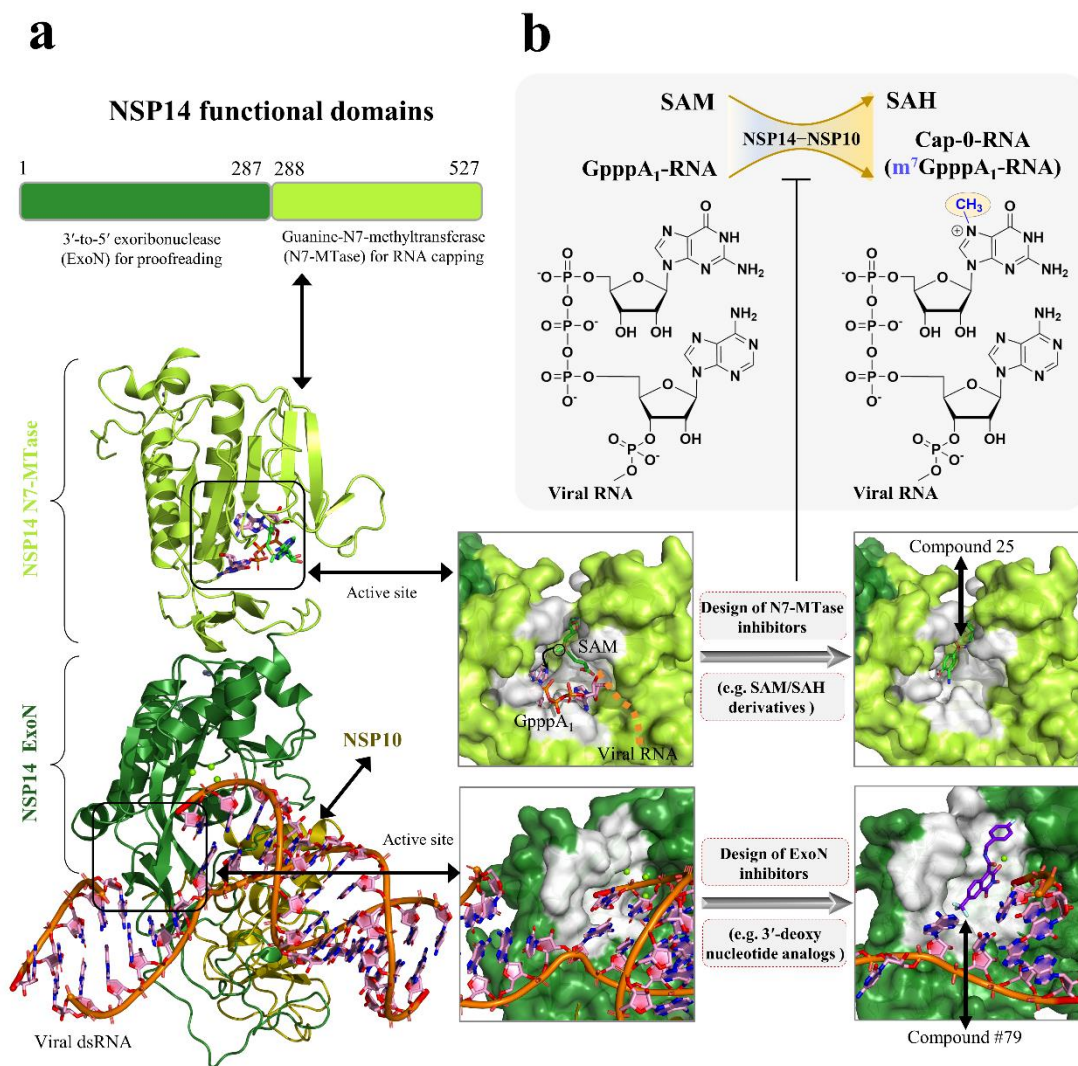

**Fig. S3 | Structures of NSP14 and its drug-binding pockets**

**a**, NSP14 functional domains. NSP14/NSP10 is visualized in complex with viral dsRNA (PDB: 7N0D), GpppA<sub>1</sub> and SAM (modified from PDB: 5C8S). Two drug-binding pockets are located within the catalytic sites of exoribonuclease and guanine-N7-methyltransferase domains. The N7-MTase inhibitor compound 25 [3] and the ExoN inhibitor compound #79 [4] are highlighted. We thank Dr. Andras Zeke from the New York University for his creation on the subfigure of NSP14 plus compound #79; Dr. Rostom Ahmed-Belkacem from the University of Montpellier for sharing the PDB file of NSP14 in complex with compound 25.

**b**, NSP14 methyltransferase transfers the methyl group from S-adenosyl methionine (SAM) to its substrate viral GpppA<sub>1</sub>-RNA, producing m<sup>7</sup>GpppA<sub>1</sub>-RNA during viral RNA capping (see all processes in **Figure 5b**).

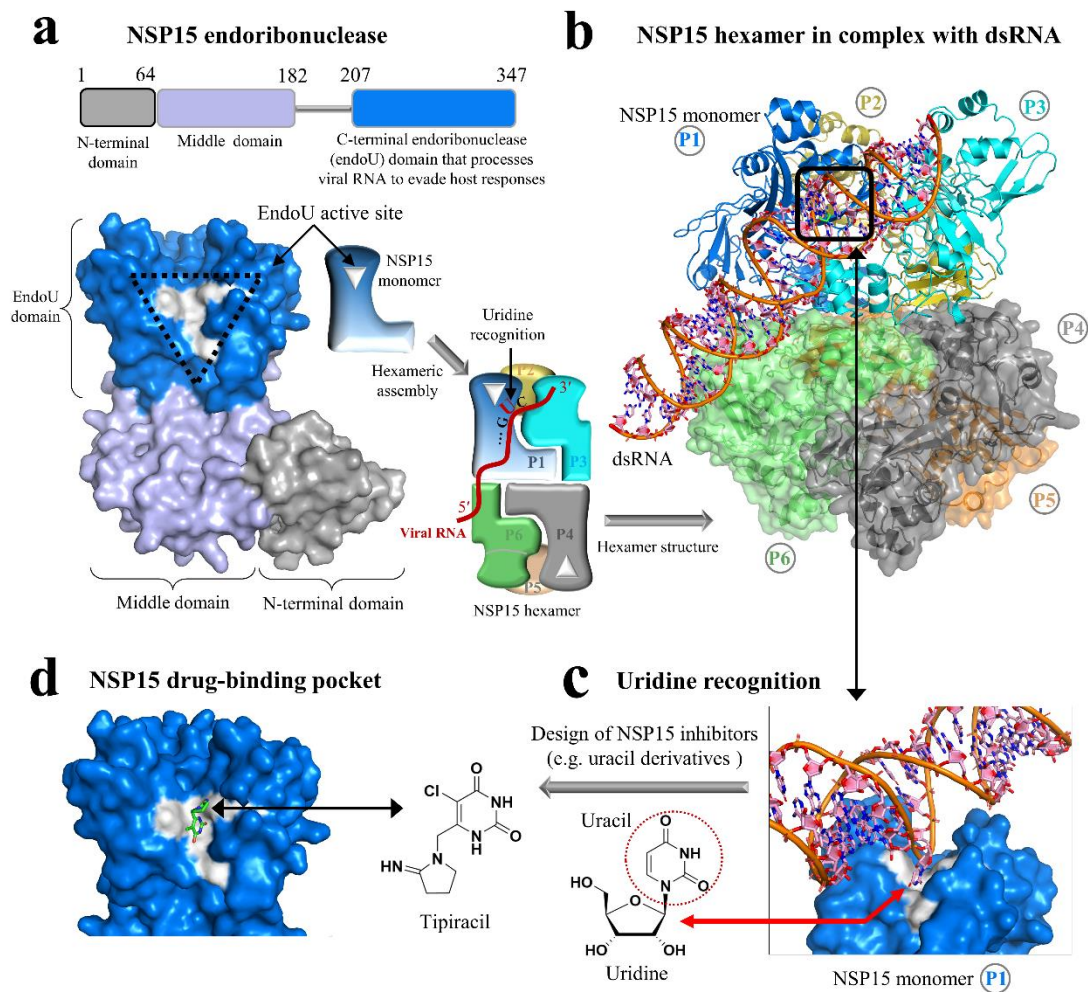

**Fig. S4 | Structures of NSP15 and its drug-binding pockets**

**a**, Functional domains of the NSP15 monomer consist of the N-terminal domain, the middle domain, and the C-terminal endoribonuclease (endoU) domain. The NSP15 catalytic site is located within the endoU domain.

**b**, Six NSP15 monomers form a hexamer (PDB: 7TQV) that recognizes uridine and cleaves the polyuridine tail from double-stranded or single-stranded viral RNA.

**c**, One subunit of the NSP15 hexamer targets the uridine of double-stranded RNA (PDB: 7TQV).

**d**, NSP15 drug-binding pocket blocked by a uracil derivative called tipiracil (PDB: 6WXC).

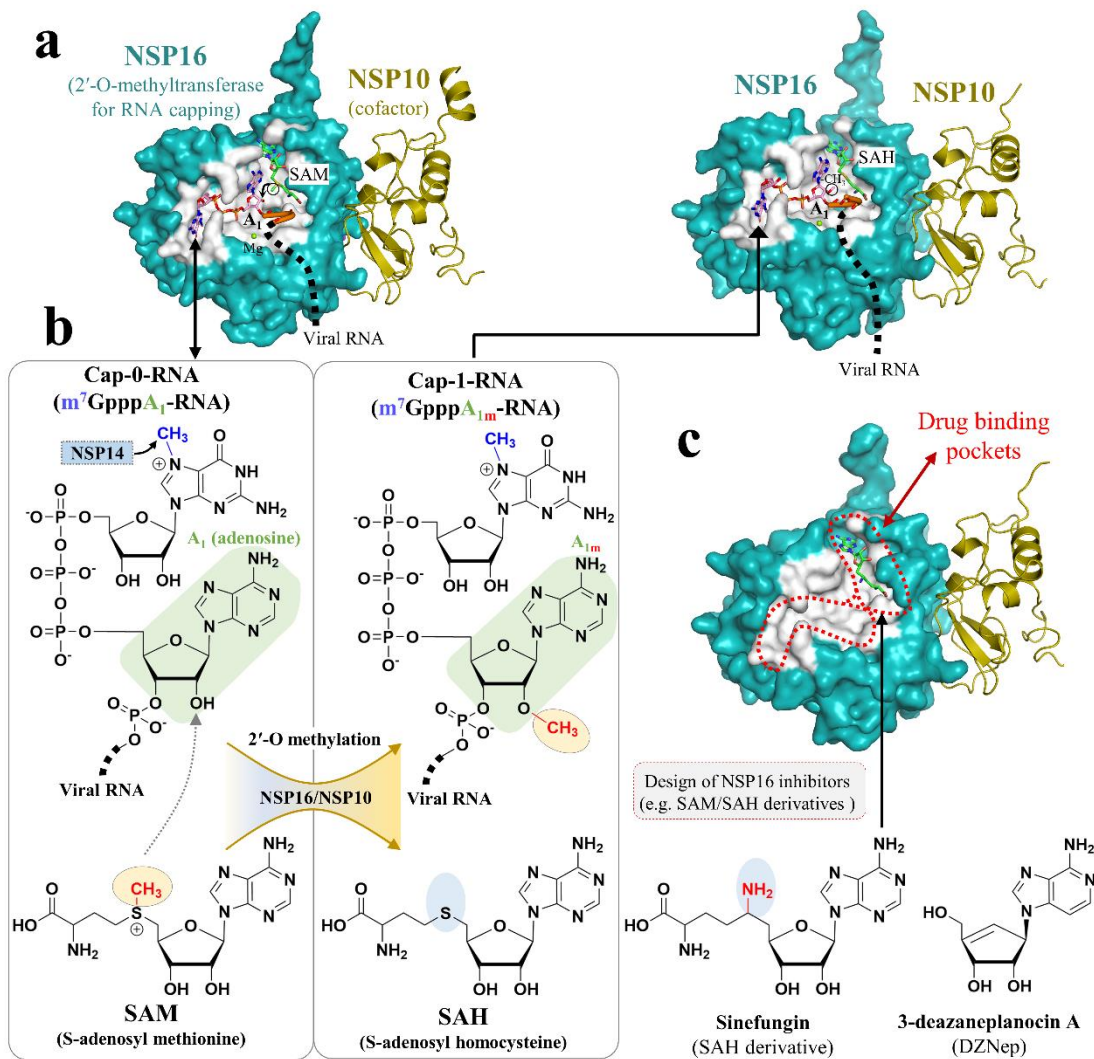

**Fig. S5 | Structures of NSP16/NSP10 and its drug-binding pockets**

**a**, NSP16 2'-O-methyltransferase and its activator NSP10 form a heterodimer complex to efficiently convert viral RNA from the Cap-0-RNA to the Cap-1-RNA configuration. SAM (PDB: 7JYY) and SAH (PDB: 7L6T) within the catalytic site are shown.

**b**, Catalytic site of NSP16 methylates the ribose 2'-O of the first nucleotide (usually adenosine) in nascent SARS-CoV-2 RNA by transferring the methyl group from S-adenosyl methionine (SAM) to the substrate Cap-0-RNA [5].

**c**, Drug-binding pockets within the catalytic site of NSP16. Sinefungin mimics the SAM structure to competitively block 2'-O methylation of viral RNA capping (PDB: 6YZ1).

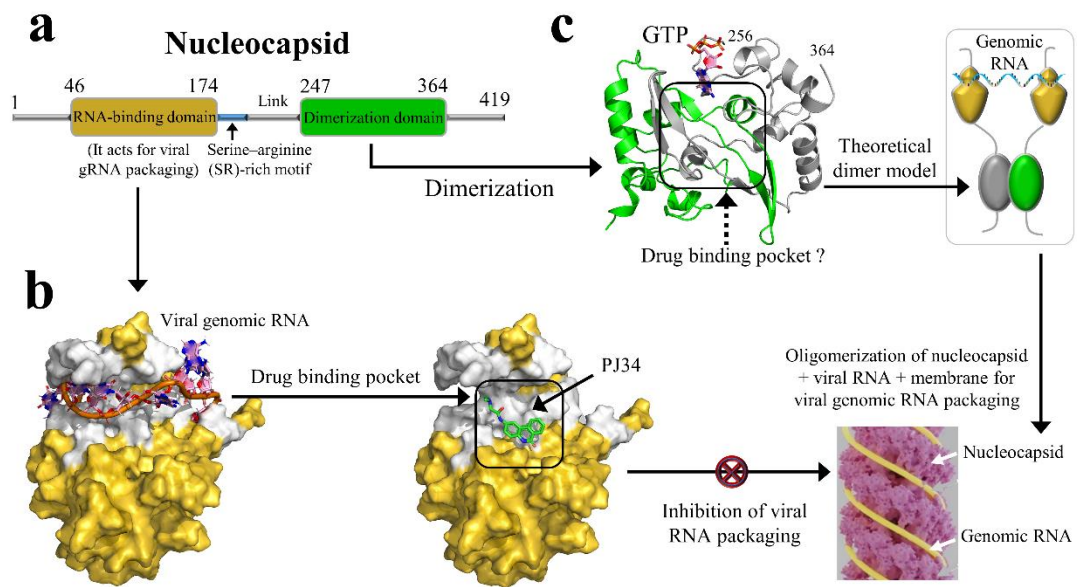

**Fig. S6 | Structures of nucleocapsid and its drug-binding pockets**

**a**, Functional domains of SARS-CoV-2 nucleocapsid.

**b**, RNA-binding domain in complex with the viral single-stranded RNA (PDB: 7ACT). The drug-binding pocket of the experimental inhibitor PJ34 (PDB: 4KXJ) is located within the interaction interface between the RNA-binding domain and viral ssRNA.

**c**, Dimerization domains of the SARS-CoV-2 nucleocapsid dimer in complex with GTP (PDB: 7O35). A hypothetical drug-binding pocket is located between two subunits. Viral RNA packaging is mediated via oligomerization of nucleocapsid dimers, viral genomic RNA, and viral membrane protein [6].



# Our data collection procedure

## Literature collection

- (i) We used the keywords “coronavirus”, “COVID”, and “SARS” to collect relevant publications from the PubMed database and Google Scholar. The publication date was set from 2020/01/01 to 2023/02/01.
- (ii) We used protein sequences from the SARS-CoV-2 reference genome to collect publications from the Protein Data Bank ([RCSB PDB: Homepage](https://www.rcsb.org/)). Publications that reported the PDB data of SARS-CoV-2 proteins were collected.
- (iii) We also searched references from any relevant publication that has reported anti-SARS-CoV-2 inhibitors.

## Data collection

- (i) We screened publications and selected those publications that only reported anti-SARS-CoV-2 activities of inhibitors in cell culture or animal models.
- (ii) We removed all prediction results of anti-SARS-CoV-2 inhibitors unless *in vitro* or *in vivo* results were also provided to prove the anti-SARS-CoV-2 activity.
- (iii) We collected IC<sub>50</sub>, EC<sub>50</sub>, and CC<sub>50</sub> results if any of them were reported in certain cell lines and SARS-CoV-2 strains. If results were evaluated by purified proteins without using live viruses in cell culture, we used “biochemical assays” to indicate such results.
- (iv) We obtained the clinical status of inhibitors by searching the database of clinical trials (<http://clinicaltrials.gov>). The status of inhibitors was classified as either preclinical or clinical stage (only the highest phase was indicated with the clinical trial ID).
- (v) We only selected the most potent inhibitors from each individual publication.
- (vi) For the summary of clinical results in Table S5, we focused on the randomized clinical trials with the sample size > 100 and excluded observational studies.

## Data website:

We created [www.virusface.com](http://www.virusface.com) to update results of anti-SARS-CoV-2 inhibitors.

**Table S1: Summary of virus-targeted inhibitors with anti-SARS-CoV-2 activity**

| Viral protein        | Drug name               | Type  | IC <sub>50</sub>               | EC <sub>50</sub>               | CC <sub>50</sub>         | Cell line               | SARS-CoV-2 strain                    | Status                                    | Ref. |
|----------------------|-------------------------|-------|--------------------------------|--------------------------------|--------------------------|-------------------------|--------------------------------------|-------------------------------------------|------|
| NSP1                 | Montelukast             | Small | Kd:10.8± 0.2 μM                |                                |                          | Vero E6                 | Hong Kong/VM200 01061/2020           | Preclinical                               | [7]  |
| Papain-like protease | F0213                   | Small | 7.4 μmol/L                     | 4.549 μmol/L                   |                          | Vero E6-TMPRSS2 cells   | SARS-CoV-2 HKU-001a                  | Preclinical                               | [8]  |
|                      | F0326                   | Small | 8.2 μmol/L                     | 7.62 μmol/L                    |                          | Vero E6-TMPRSS2 cells   | SARS-CoV-2 HKU-001a                  | Preclinical                               | [8]  |
|                      | GRL-0617                | Small | 1.50 ± 0.08μM<br>0.74 ± 0.07μM |                                |                          |                         | Strain FFM1 (accession no. MT358638) | Preclinical                               | [1]  |
|                      |                         |       | 2.4 ± 0.2 μM                   | 27.6 ± 1.2 μM                  |                          | Vero E6                 | USA-WA1 / 2020                       |                                           | [9]  |
|                      |                         |       | 1.61 μM                        | 27.6 μM                        |                          | A549-hACE2              | USA-WA1 / 2020                       |                                           | [10] |
|                      |                         |       |                                | 35.43 μM                       | 48.28±20.74 μM           | Vero E6                 | USA-WA1 / 2020                       |                                           | [11] |
|                      |                         |       | FRET:2.05±0.12μM               | 23.64±4.72 μM,<br>19.96±8.82μM | >60 μM                   | Vero E6,<br>Caco2-hACE2 | USA-WA1/2020                         |                                           | [12] |
|                      | Compound 6              | Small | 5 ± 1.9 μM                     | 21 ± 1.9 μM                    |                          | Vero E6                 | USA-WA1 / 2020                       | Preclinical                               | [9]  |
|                      | ZN-2-184                | Small | 1.01 ± 0.15 mM                 |                                |                          | A549-hACE2              | USA-WA1 / 2020                       | Preclinical                               | [10] |
|                      | ZN-3-80                 | Small | 0.59 ± 0.04 mM                 |                                |                          | A549-hACE2              | USA-WA1 / 2020                       | Preclinical                               | [10] |
|                      | XR8-24                  | Small | 0.56 ± 0.03 mM                 | 1.2 μM                         | > 50 μM                  | A549-hACE2              | USA-WA1 / 2020                       | Preclinical                               | [10] |
|                      | XR8-23                  | Small | 0.39 ± 0.05 mM                 | 1.4 μM                         | 21.6 ± 1.1 μM            | A549-hACE2              | USA-WA1 / 2020                       | Preclinical                               | [10] |
|                      | 6-TG                    | Small |                                | 2.13 ± 1.16 μM                 | 35.5 μM                  | Vero E6                 | USA-WA1 / 2020                       | Preclinical                               | [11] |
|                      | Jun9-72-2               | Small | FRET:0.67±0.08μM               | 6.62±1.31μM,<br>7.9±2.4μM      | >60 μM,<br>>60 μM        | Vero E6,<br>Caco2-hACE2 | USA-WA1/2020                         | Preclinical                               | [12] |
|                      | Jun9-75-4               | Small | FRET:0.62±0.06μM               | 7.88±1.44μM,<br>12.48±3.43μM   | 47.48±14.63μM,<br>>60 μM | Vero E6,<br>Caco2-hACE2 | USA-WA1/2020                         | Preclinical                               | [12] |
|                      | VIR250                  | Small |                                |                                |                          | HEK293T                 | BL21(DE3)                            | Preclinical                               | [13] |
|                      | VIR251                  | Small |                                |                                |                          | HEK293T                 | BL21(DE3)                            | Preclinical                               | [13] |
|                      | Acridiflavine           | Small | 86 nM<br>64 nM                 |                                | 3.1 μM<br>3.4 μM         | A549ACE+<br>Vero        | BavPat1/2020 026V-03883              | Preclinical                               | [14] |
|                      | EM-C                    | Small | 7.4 ± 0.37 μM                  |                                |                          | HEK293T                 |                                      | Preclinical                               | [15] |
|                      | EC-M                    | Small | 8.63 ± 0.55 μM                 |                                |                          | HEK293T                 |                                      | Preclinical                               | [15] |
|                      | Inhibitor19             | Small | 0.18 ± 0.1 μM                  |                                | > 10 μM                  | hACE2-HeLa              | SARS-CoV2 (SZ02)                     | Preclinical                               | [16] |
|                      | Cryptotanshinone        | Small | 5.63 ± 1.45 μmol/L             | 0.70 ± 0.09 μmol/L             | > 300 μmol/L             | Vero E6                 | nCoV-2019BetaCoV/Wuhan/WIV04/2019    | Preclinical                               | [17] |
|                      | Tanshinone I            | Small | 2.21 ± 0.1 μmol/L              | 2.26 ± 0.11 μmol/L             | > 300 μmol/L             | Vero E6                 | nCoV-2019BetaCoV/Wuhan/WIV04/2019    | Preclinical                               | [17] |
|                      | YM155                   | Small | 2.47±0.46 μmol/L               | 0.17 ± 0.22 μmol/L             | ~ 400 μmol/L             | Vero E6                 | nCoV-2019BetaCoV/Wuhan/WIV04/2019    | Preclinical                               | [17] |
|                      | RI173                   | Small | 0.2±0.1 μM                     | 0.1 μM                         | 0.3±0.1μM                | Huh-7.5.1               |                                      | Preclinical                               | [18] |
|                      | Rac5c<br>Rac3j<br>Rac3k | Small | 0.81 μM<br>1.4 μM<br>1.15 μM   |                                |                          | Vero (CCL-81)           | From a COVID-19 patient              | Preclinical<br>Preclinical<br>Preclinical | [19] |

|  |                                                         |         |                                             |                                                                               |               |                                                                |                                   |                                          |      |
|--|---------------------------------------------------------|---------|---------------------------------------------|-------------------------------------------------------------------------------|---------------|----------------------------------------------------------------|-----------------------------------|------------------------------------------|------|
|  | Tropifexor                                              | Small   | 5.11 $\mu$ M                                | 4.03 $\mu$ M                                                                  |               | Calu-3 cells                                                   |                                   | Preclinical                              | [20] |
|  | Ebselen derivative 1d                                   | Small   | 236 $\pm$ 107nM                             |                                                                               |               |                                                                | Biochemical assay                 | Preclinical                              | [21] |
|  | Methyl 3,4-dihydroxybenzoate (HE9)                      | Small   | 0.2 $\mu$ M                                 | 10 $\mu$ M                                                                    | >100 $\mu$ M  | Vero                                                           | SARS.CoV2/S P02.2020.HIA E.Br     | Preclinical                              | [2]  |
|  | 4-hydroxybenzaldehyde (HBA)                             | Small   | 1 $\mu$ M                                   | 0.13 $\mu$ M                                                                  |               | Vero                                                           | SARS.CoV2/S P02.2020.HIA E.Br     | Preclinical                              | [2]  |
|  | 4-(2-hydroxyethyl)phenol (YRL)                          | Small   | 1.3 $\mu$ M                                 | 1 $\mu$ M                                                                     | >100 $\mu$ M  | Vero                                                           | SARS.CoV2/S P02.2020.HIA E.Br     | Preclinical                              | [2]  |
|  | 3-amino-N-(naphthalene-1-yl)-5-trifluoromethylbenzamide | Small   | Biochemical assay: 43.2 $\pm$ 9.4 $\mu$ M   | 1.7 $\pm$ 4.4 $\mu$ M                                                         |               | Vero E6                                                        | nCoV/Washington/1/2020            | Preclinical                              | [22] |
|  | Disulfiram                                              | Small   | 17.45 $\mu$ M                               |                                                                               | 41.34 $\mu$ M | Vero E6                                                        | SARS-CoV-2 (TCDC#4)               | Preclinical                              | [23] |
|  | Bis[2-(N,N-dimethylamino)ethyl] disulfide (DMGA)        | Small   | 9.4 $\pm$ 2.5 $\mu$ M                       |                                                                               |               |                                                                | Biochemical assay                 | Preclinical                              | [24] |
|  | Compound 7                                              | Small   | 6.0 $\mu$ M                                 | 4.59 $\pm$ 1.22 $\mu$ M<br>2.70 $\pm$ 0.99 $\mu$ M<br>2.98 $\pm$ 0.80 $\mu$ M | >800 $\mu$ M  | Vero E6                                                        | WT, Delta, Omicron                | Preclinical                              | [25] |
|  | Proanthocyanidin LY1                                    | Small   | 2.4 $\pm$ 0.3 $\mu$ M                       | 6.6 $\pm$ 1.5 $\mu$ M                                                         | >100 $\mu$ M  | Vero E6                                                        |                                   | Preclinical                              | [26] |
|  | Schaftoside                                             | Small   | 3.91 $\pm$ 0.19 $\mu$ mol/L                 | 11.83 $\pm$ 3.23 $\mu$ mol/L                                                  |               | Vero E6                                                        | nCoV-2019BetaCoV/Wuhan/WIV04/2019 | Preclinical                              | [28] |
|  | UbV.CV2.1                                               | Peptide | 11.8 nM                                     |                                                                               |               |                                                                | Biochemical assays                | Preclinical                              | [29] |
|  |                                                         |         |                                             |                                                                               |               |                                                                |                                   |                                          |      |
|  | <b>Mac1 (ADP-ribosylhydrolase)</b>                      |         |                                             |                                                                               |               |                                                                |                                   |                                          |      |
|  | 50779772/F5941001                                       | Small   | 8.5 $\pm$ 0.1 to 68 $\mu$ M in three assays |                                                                               |               |                                                                | Biochemical assays                | Preclinical                              | [30] |
|  | Dasatinib                                               | Small   | 37.5 to 57.5 $\mu$ M                        |                                                                               |               |                                                                | AMP-Glo assay                     | Preclinical                              | [31] |
|  | LRH-0021                                                | Small   | 1.7 $\mu$ M                                 |                                                                               |               |                                                                |                                   | Preclinical                              | [32] |
|  |                                                         |         |                                             |                                                                               |               |                                                                |                                   |                                          |      |
|  | <b>Main protease (NSP5)</b>                             |         |                                             |                                                                               |               |                                                                |                                   |                                          |      |
|  | Nirmatrelvir (PF-07321332)                              | Small   |                                             | 74.5 nM<br>77.9 nM                                                            |               | Vero E6<br>A549+ACE2                                           | USA-WA1 / 2020                    | Approved or authorized in many countries | [33] |
|  | Nirmatrelvir-derivative 5                               | Small   | 0.008 $\pm$ 0.001 $\mu$ M                   | 0.193 $\pm$ 0.118 $\mu$ M                                                     |               |                                                                | Biochemical assay                 | Preclinical                              | [34] |
|  | Nirmatrelvir-derivative 10                              | Small   | 0.027 $\pm$ 0.001 $\mu$ M                   | 0.242 $\pm$ 0.132 $\mu$ M                                                     |               |                                                                | Biochemical assay                 | Preclinical                              | [34] |
|  | Nirmatrelvir alkyne derivative 13                       | Small   | 0.41 $\pm$ 0.03 $\mu$ M                     | 25.7 $\pm$ 4.1 $\mu$ M                                                        |               | Vero E6                                                        | Victoria strain-100 FFU           | Preclinical                              | [35] |
|  | Ensitrelvir (S-217622)                                  | Small   |                                             | 26 $\pm$ 6.65 nM<br>407 $\pm$ 21.3 nM<br>69 $\pm$ 11.2 nM                     |               | 293 T hACE2-TMPRSS2, Vero-TMPRSS2, Vero-TMPRSS2 with CP-100356 | Delta                             | Phase 3 (NCT05305547)                    | [36] |
|  | SIM0417                                                 | Small   |                                             |                                                                               |               |                                                                | Omicron                           | Phase 2/3                                |      |

|  |                            |       |                                                                                                |                                                                                                          |                                                                     |                               |                                                                                              |                                                                   |      |
|--|----------------------------|-------|------------------------------------------------------------------------------------------------|----------------------------------------------------------------------------------------------------------|---------------------------------------------------------------------|-------------------------------|----------------------------------------------------------------------------------------------|-------------------------------------------------------------------|------|
|  |                            |       |                                                                                                |                                                                                                          |                                                                     |                               |                                                                                              | (NCT05506176)                                                     |      |
|  | Lufotrelvir (PF-07304814)  | Small |                                                                                                | 39.8 $\mu$ M;<br>88.9 $\mu$ M                                                                            | > 100 $\mu$ M;<br>> 100 $\mu$ M                                     | Vero E6-<br>enACE2            | USA-WA1 /<br>2020;<br>BetaCov<br>GHB-<br>03021/2020                                          | Withdrawn<br>from the<br>ACTIV-3,<br>phase 3<br>(NCT04501<br>978) | [37] |
|  | FB2001                     | Small |                                                                                                | 0.39 $\pm$ 0.01 $\mu$ M<br>0.28 $\pm$ 0.11 $\mu$ M<br>0.27 $\pm$ 0.05 $\mu$ M<br>0.26 $\pm$ 0.06 $\mu$ M | 274.4 $\mu$ M,<br>274.4 $\mu$ M,<br>274.4 $\mu$ M,<br>242.7 $\mu$ M | Vero E6                       | B.1.1.7<br>(Alpha),<br>B.1.351<br>(Beta),<br>B.1.617.2<br>(Delta),<br>B.1.1.529<br>(Omicron) | Phase 2/3<br>(NCT05445<br>934)                                    | [38] |
|  | Masitinib                  | Small | 2.5 $\mu$ M                                                                                    | 3.2 $\mu$ M                                                                                              | > 10 $\mu$ M                                                        | A549                          | USA-WA1 /<br>2020                                                                            | Phase 2<br>(NCT04622<br>865,<br>NCT05047<br>783)                  | [39] |
|  | Ebselen                    | Small | 0.67 $\pm$ 0.09<br>$\mu$ M                                                                     | 4.67 $\pm$ 0.8 $\mu$ M                                                                                   |                                                                     | Vero E6                       | BetaCoV/<br>Wuhan/WIV0<br>4/2019                                                             | Phase 2<br>(NCT04484<br>025,<br>NCT04483<br>973)                  | [40] |
|  |                            | Small | Vero E6:<br>0.33 $\mu$ M                                                                       | Calu-3:<br>5.0 $\pm$ 4.0 $\mu$ M                                                                         |                                                                     | Vero E6<br>Calu-3             | USA-WA1 /<br>2020                                                                            |                                                                   | [41] |
|  | All-trans<br>retinoic acid | Small | VeroE6/TMP<br>RSS2:<br>2.69 $\pm$ 0.09 $\mu$ M<br>Calu-<br>3:0.82 $\pm$ 0.01<br>$\mu$ M        |                                                                                                          | > 100 $\mu$ M                                                       | VeroE6/TMPR<br>SS2,<br>Calu-3 | JPN/TY-WK-<br>521/2020P1/2<br>021                                                            | Phase 2<br>(NCT04396<br>067,<br>NCT04568<br>096)                  | [42] |
|  | PF-00835231                | Small | 0.27 $\pm$ 0.1 nM                                                                              | 0.27 $\mu$ M                                                                                             |                                                                     |                               | Vero E6                                                                                      | Phase 1<br>(NCT04535<br>167)                                      | [43] |
|  |                            | Small |                                                                                                | 0.422 $\mu$ M (24h)<br>0.344 $\mu$ M (48h)                                                               | >10 $\mu$ M                                                         | A549+ACE2                     | USA-WA1 /<br>2020                                                                            |                                                                   | [44] |
|  |                            | Small |                                                                                                | 0.326 $\mu$ M (24h)                                                                                      | >10 $\mu$ M                                                         | A549+ACE2                     | USA/NYU-<br>VC-003/2020                                                                      |                                                                   | [44] |
|  | MR6-31-2                   | Small | WT:0.824 $\mu$ M                                                                               | 5.4 $\mu$ M                                                                                              |                                                                     | Vero E6                       | nCoV-<br>2019BetaCoV/<br>Wuhan/WIV0<br>4/2019                                                | Preclinical                                                       | [45] |
|  | GC373                      | Small | 0.40 $\pm$ 0.05 $\mu$ M                                                                        | 1.5 $\mu$ M                                                                                              | >200 $\mu$ M                                                        | Vero E6                       | SARS-CoV-<br>2/CANADA/<br>VIDO 01/2020                                                       | Preclinical                                                       | [46] |
|  | GC376                      | Small | 0.03 $\mu$ M                                                                                   | 0.49~3.37 $\mu$ M                                                                                        | > 100 $\mu$ M                                                       | Vero 76                       | USA-WA1 /<br>2020                                                                            | Preclinical                                                       | [47] |
|  |                            | Small | FRET Assay:<br>0.052 $\pm$ 0.007<br>$\mu$ M<br>SAMDI-MS<br>Assay: 0.060 $\pm$<br>0.019 $\mu$ M | 10 $\pm$ 4.2 $\mu$ M                                                                                     | > 100 $\mu$ M                                                       | Vero E6                       | SARS2_Belgi<br>um_20200414                                                                   |                                                                   | [48] |
|  |                            | Small |                                                                                                | 0.48 $\pm$ 0.29 $\mu$ M                                                                                  |                                                                     |                               | USA-WA1 /<br>2020                                                                            |                                                                   | [49] |
|  |                            | Small | 160 $\pm$ 34 nM                                                                                | 2.189 $\pm$ 0.092 $\mu$ M                                                                                |                                                                     | Vero E6                       | USA-WA1 /<br>2020                                                                            |                                                                   | [50] |
|  |                            | Small | 0.19 $\pm$ 0.04 $\mu$ M                                                                        | 0.92 $\mu$ M                                                                                             | >200 $\mu$ M                                                        | Vero E6                       | SARS-CoV-<br>2/CANADA/<br>VIDO 01/2020                                                       | Preclinical                                                       | [46] |
|  | GRL-1720                   | Small | 0.32 $\pm$ 0.02                                                                                | 15 $\pm$ 4 $\mu$ M                                                                                       | > 100 $\mu$ M                                                       | Vero E6                       | JPN/TY/WK-                                                                                   | Preclinical                                                       | [51] |

|  |                                        |       |                                                                                                                          |                                                                                           |                                                                  |                                                     |                                  |                                                          |      |
|--|----------------------------------------|-------|--------------------------------------------------------------------------------------------------------------------------|-------------------------------------------------------------------------------------------|------------------------------------------------------------------|-----------------------------------------------------|----------------------------------|----------------------------------------------------------|------|
|  |                                        |       | $\mu\text{M}$                                                                                                            |                                                                                           |                                                                  |                                                     | 521                              |                                                          |      |
|  | Compound 5h                            | Small |                                                                                                                          | VeroE6:<br>$4.2 \pm 0.7 \mu\text{M}$                                                      | VeroE6:<br>$> 100 \mu\text{M}$<br>Calu-3:<br>$> 200 \mu\text{M}$ | Vero E6,<br>Calu-3                                  | JPN/TY/WK-<br>521                | Preclinical                                              | [51] |
|  | YH-53                                  | Small |                                                                                                                          |                                                                                           | $> 100 \mu\text{M}$                                              | Vero                                                | JPN/TY/WK-<br>521                | Preclinical                                              | [52] |
|  |                                        | Small | $0.124 \mu\text{M}$                                                                                                      |                                                                                           |                                                                  |                                                     |                                  | Preclinical                                              | [53] |
|  | 11r                                    | Small | $0.18 \pm 0.02 \mu\text{M}$                                                                                              |                                                                                           |                                                                  | Calu-3                                              |                                  | Preclinical                                              | [54] |
|  |                                        | Small | $0.71 \pm 0.36 \mu\text{M}$                                                                                              | $1.8 \pm 2.1 \mu\text{M}$                                                                 |                                                                  | Vero E6                                             | BetaCoV/Wuh<br>an/2019           | Preclinical                                              | [55] |
|  | 11u                                    | Small | $1.27 \pm 0.34 \mu\text{M}$                                                                                              | $4.9 \pm 1.2 \mu\text{M}$<br>$3.6 \pm 0.1 \mu\text{M}$                                    |                                                                  | Vero E6                                             | BetaCoV/Wuh<br>an/2019           | Preclinical                                              | [55] |
|  | 13b                                    | Small | $0.67 \pm 0.18 \mu\text{M}$                                                                                              |                                                                                           |                                                                  | Calu-3                                              |                                  | Preclinical                                              | [54] |
|  | 13b-K                                  | Small | $0.12 \pm 0.03 \mu\text{M}$                                                                                              | $2.4 \pm 0.7 \mu\text{M}$<br>$3.4 \mu\text{M}$<br>$1.3 \mu\text{M}$<br>$0.84 \mu\text{M}$ | $> 100 \mu\text{M}$                                              | Calu 3<br>Huh 7<br>Vero E6<br>A549-ACE2-<br>TMPRSS2 |                                  | Preclinical                                              | [56] |
|  | Rupintrivir<br>(AG-7088,<br>Rupinavir) | Small | $68 \pm 7 \mu\text{M}$                                                                                                   | $3 \sim 183 \text{ nM}$                                                                   |                                                                  | A549+ACE2                                           |                                  | Preclinical                                              | [57] |
|  | 6e                                     | Small | $0.17 \pm 0.06 \mu\text{M}$                                                                                              | $0.15 \pm 0.14 \mu\text{M}$                                                               | $63.3 \pm 2.3 \mu\text{M}$                                       | Vero E6                                             |                                  | Preclinical                                              | [58] |
|  | 23R                                    | Small | $0.66 \pm 0.07 \mu\text{M}$                                                                                              | $3.03 \mu\text{M}$                                                                        | $> 100 \mu\text{M}$                                              | Vero E6                                             | USA-WA1 /<br>2020                | Preclinical                                              | [59] |
|  | ALG-097111                             | Small | $7 \text{ nM}$                                                                                                           | $200 \pm 18.4 \text{ nM}$                                                                 | $> 100 \mu\text{M}$                                              | A549                                                | GHB-<br>03021/2020               | Preclinical                                              | [60] |
|  | N3                                     | Small |                                                                                                                          | $16.77 \pm 1.7 \mu\text{M}$                                                               |                                                                  | Vero E6                                             | BetaCoV/<br>Wuhan/WIV0<br>4/2019 | Preclinical                                              | [40] |
|  | E24                                    | Small | $2.77 \pm 0.51 \mu\text{M}$                                                                                              | $0.84 \pm 0.3 \mu\text{M}$<br>$1.3 \pm 0.8 \mu\text{M}$                                   |                                                                  | Vero E6<br>Calu-3                                   | USA-WA1 /<br>2020                | Preclinical                                              | [41] |
|  | Compound 4                             | Small | $151 \pm 15 \text{ nM}$                                                                                                  | $2.883 \pm 0.227 \mu\text{M}$                                                             |                                                                  | Vero E6                                             | USA-WA1 /<br>2020                | Preclinical                                              | [50] |
|  | MAC-5576                               | Small | $81 \pm 12 \text{ nM}$                                                                                                   | N/A                                                                                       |                                                                  | Vero E6                                             | USA-WA1 /<br>2020                | Preclinical                                              | [50] |
|  | CBS                                    | Small | $0.93 \pm 0.04 \mu\text{M}$                                                                                              | $177.3 \pm 32 \mu\text{M}$                                                                | $> 2000 \mu\text{M}$                                             | Vero E6                                             |                                  | Preclinical                                              | [61] |
|  | 2j                                     | Small | $0.75 \pm 0.2 \mu\text{M}$                                                                                               |                                                                                           |                                                                  | HEK293T                                             | Wuhan-Hu-1                       | Preclinical                                              | [62] |
|  | 14a                                    | Small | $0.42 \pm 0.11 \mu\text{M}$                                                                                              |                                                                                           |                                                                  |                                                     |                                  | Preclinical                                              | [63] |
|  | 16a                                    | Small | $0.41 \pm 0.13 \mu\text{M}$                                                                                              |                                                                                           |                                                                  |                                                     |                                  | Preclinical                                              | [63] |
|  | C1                                     | Small | $1.55 \pm 0.21 \mu\text{M}$                                                                                              |                                                                                           |                                                                  |                                                     |                                  | Preclinical                                              | [64] |
|  | C2                                     | Small | $1.81 \pm 0.17 \mu\text{M}$                                                                                              |                                                                                           |                                                                  |                                                     |                                  | Preclinical                                              | [64] |
|  | Chebulagic<br>acid                     | Small | $9.09 \pm 0.87 \mu\text{M}$                                                                                              | $9.76 \pm 0.42 \mu\text{M}$                                                               | $> 100 \mu\text{M}$                                              | Vero E6                                             | USA-WA1 /<br>2020                | Preclinical                                              | [65] |
|  | p12<br>p13<br>p15<br>p16               | Small | $5.36 \pm 2.17 \mu\text{M}$<br>$3.11 \pm 1.80 \mu\text{M}$<br>$5.31 \pm 1.08 \mu\text{M}$<br>$3.76 \pm 0.51 \mu\text{M}$ |                                                                                           |                                                                  |                                                     |                                  | Preclinical<br>Preclinical<br>Preclinical<br>Preclinical | [66] |
|  | CDD-1976                               | Small | $2.50 \mu\text{M}$                                                                                                       |                                                                                           |                                                                  | Vero E6                                             | USA-WA1 /<br>2020                | Preclinical                                              | [67] |
|  | Ethacridine                            | Small | $3.54 \pm 0.66 \mu\text{M}$                                                                                              | $0.08 \pm 0.01 \mu\text{M}$                                                               | $> 40 \mu\text{M}$                                               | Vero E6                                             | USA-WA1 /<br>2020                | Preclinical                                              | [68] |
|  | Glycyrrhizin                           | Small |                                                                                                                          | $0.44 \text{ mg / mL}$                                                                    |                                                                  | Vero E6                                             | From a<br>COVID-19<br>patient    | Preclinical                                              | [69] |
|  | Entrectinib                            | Small | $10.6 \mu\text{M}$                                                                                                       | $198 \pm 116 \text{ nM}$                                                                  |                                                                  | Vero E6                                             |                                  | Preclinical                                              | [70] |
|  | Calpeptin                              | Small |                                                                                                                          | $0.072 \mu\text{M}$                                                                       | $> 100 \mu\text{M}$                                              | Vero E6                                             | human/DEU/<br>HH-1/2020          | Preclinical                                              | [71] |
|  | Pelitinib                              | Small |                                                                                                                          | $1.25 \mu\text{M}$                                                                        | $13.96 \mu\text{M}$                                              | Vero E6                                             | human/DEU/<br>HH-1/2020          | Preclinical                                              | [71] |
|  | Boceprevir                             | Small | $3.1 \mu\text{M}$                                                                                                        |                                                                                           |                                                                  |                                                     |                                  | Preclinical                                              | [72] |

|  |                                                                         |       |                                                   |                                                                  |                          |                               |                                  |                                                          |      |
|--|-------------------------------------------------------------------------|-------|---------------------------------------------------|------------------------------------------------------------------|--------------------------|-------------------------------|----------------------------------|----------------------------------------------------------|------|
|  |                                                                         | Small | 4.13±0.61 µM                                      | 1.95±1.62 µM                                                     |                          | Vero 76                       | USA-WA1 / 2020                   |                                                          | [47] |
|  | Narlaprevir                                                             | Small | 5.1 µM                                            |                                                                  |                          |                               |                                  | Preclinical                                              | [72] |
|  |                                                                         |       | 23.8 ± 6.5 µmol/L                                 |                                                                  |                          |                               | FlipGFP-M <sub>pro</sub> assay   | Preclinical                                              | [73] |
|  | Telaprevir                                                              | Small | 19.9 ± 3.0 µmol/L                                 |                                                                  |                          |                               | FlipGFP-M <sub>pro</sub> assay   | Preclinical                                              | [73] |
|  | Manidipine<br>Boceprevir<br>Lercanidipine<br>Bedaquiline<br>Efonidipine | Small | 4.8 µM<br>5.4 µM<br>16.2 µM<br>18.7 µM<br>38.5 µM |                                                                  |                          |                               |                                  | Preclinical<br>Preclinical<br>Preclinical<br>Preclinical | [74] |
|  | Carmofur                                                                | Small | 1.82 µM                                           | 24.3 µM                                                          | 133.4 µM                 | Vero E6                       | Wuhan/WIV04/2019                 | Preclinical                                              | [75] |
|  | Myricetin                                                               | Small | 0.63 µM                                           | 8.00 µM                                                          | > 200 µM                 | Vero E6                       | A clinical isolate SARS-CoV-2    | Preclinical                                              | [76] |
|  | Compound 7d                                                             | Small | 73 nM                                             | 15 µM                                                            |                          | Vero E6                       | JPN/TY/WK-521 (SARS-CoV-2WK-521) | Preclinical                                              | [77] |
|  | Jun9-62-2R                                                              | Small | 0.43 µM                                           | 2.05 µM<br>0.90 µM                                               | > 60 µM<br>33.11 µM      | Caco2-hACE2<br>Vero E6        | USA-WA1 / 2020                   | Preclinical                                              | [78] |
|  | Jun9-88-6R                                                              | Small | 0.08 µM                                           | 2.15 µM<br>0.58 µM                                               | 10.15 µM<br>2.95 µM      | Caco2-hACE2<br>Vero E6        | USA-WA1 / 2020                   | Preclinical                                              | [78] |
|  | ML188                                                                   | Small | 2.5 ± 0.3 µM                                      |                                                                  |                          |                               |                                  | Preclinical                                              | [79] |
|  | ML300                                                                   | Small | 4.99 ± 0.62 µM                                    | 19.90 µM                                                         |                          | Vero E6                       | USA-WA1/2020                     | Preclinical                                              | [80] |
|  | CCF0058981                                                              | Small | 68±23 nM                                          | 0.497 µM                                                         | > 50 µM                  | Vero E6                       | USA-WA1 / 2020                   | Preclinical                                              | [80] |
|  | Compound19                                                              | Small | 44 ± 9 nM                                         | 0.175 ± 0.005 µM                                                 | > 32.5µM                 | Vero E6                       | USA-WA1 / 2020                   | Preclinical                                              | [81] |
|  | Compound21                                                              | Small | 61 ± 11nM                                         | 1.08 µM                                                          | > 100µM                  | Vero E6                       | USA-WA1 / 2020                   | Preclinical                                              | [81] |
|  | Cyanophenyl analogue 5                                                  | Small | 140 ± 20 µM                                       | MTT:<br>2.5 ± 0.7 µM<br>Plaque:<br>1.5 µM                        | 22 ± 7.2 µM<br>20 ± 2 µM | Vero E6<br>NHBE               | USA-WA1 / 2020                   | Preclinical                                              | [82] |
|  | Cyanophenyl analogue 26                                                 | Small | 170 ± 22 nM                                       | MTT:2.0 µM<br>Plaque:0.98 µM                                     | > 100 µM<br>> 100 µM     | Vero E6<br>NHBE               | USA-WA1 / 2020                   | Preclinical                                              | [82] |
|  | Ac-Abu-dTyr-Leu-Gln-VS (15)                                             | Small |                                                   | 3.7 µM                                                           | > 100 µM                 | Huh7                          | BetaCov/Belgium/GHB-03021/2020   | Preclinical                                              | [83] |
|  | MI-23                                                                   | Small | 7.6 nM                                            | 5.63 µM                                                          | > 500 µM                 | Vero E6                       | Strain 107                       | Preclinical                                              | [84] |
|  | MI-09                                                                   | Small | 15.2 nM                                           | Vero E6: 0.86 ± 0.07µM<br>HPAEpiC: 1.2 ± 0.1µM<br>Huh 7: 35.3 µM | > 500 µM                 | Vero E6,<br>HPAEpiC,<br>Huh 7 | Strain 107                       | Preclinical                                              | [84] |
|  | MI-30                                                                   | Small | 17.2 nM                                           | Vero E6:<br>0.54±0.13 µM<br>HPAEpiC: 1.1 ± 0.2µM<br>Huh 7: 31 µM | > 500 µM                 | Vero E6,<br>HPAEpiC,<br>Huh 7 | Strain 107                       | Preclinical                                              | [84] |
|  | HL-3-68                                                                 | Small | 0.29 µM                                           |                                                                  |                          | Vero E6<br>TMPRSSS            | USA-WA1 / 2020                   | Preclinical                                              | [85] |
|  | Mcule-CSR-494190-S1                                                     | Small | 0.29 µM                                           |                                                                  |                          | Vero E6<br>TMPRSSS            | USA-WA1 / 2020                   | Preclinical                                              | [85] |
|  | 11a                                                                     | Small | 53 ± 5 nM                                         | 0.53 ± 0.01 µM                                                   | > 100 µM                 | Vero E6                       | BetaCoV/Wuhan/WIV04/2019         | Preclinical                                              | [86] |
|  | 11b                                                                     | Small | 40 ± 2 nM                                         | 0.72 ± 0.09 µM                                                   | > 100 µM                 | Vero E6                       | BetaCoV/Wuhan/WIV04/2019         | Preclinical                                              | [86] |
|  | Shikonin                                                                | Small | 1.57 ± 0.32 µM                                    |                                                                  |                          |                               |                                  | Preclinical                                              | [87] |

|  |                                  |       |                |                          |                   |                     |                                              |             |       |
|--|----------------------------------|-------|----------------|--------------------------|-------------------|---------------------|----------------------------------------------|-------------|-------|
|  |                                  | Small | 15.75±8.22µM   |                          |                   | Vero E6             |                                              | Preclinical | [88]  |
|  | Compound 21                      | Small | 0.018 µM       |                          |                   |                     |                                              | Preclinical | [88]  |
|  | Compound 19                      | Small | 0.077 µM       | 0.11 ±0.03 µM<br>77±8 nM | > 5 µM<br>> 20 µM | Huh7<br>Vero E6     | BetaCov/Belgium/GHB-03021/2020               | Preclinical | [89]  |
|  | Compound 6                       | Small | 4.8 ± 3.4µM    |                          |                   |                     |                                              | Preclinical | [90]  |
|  | Compound 12                      | Small | 1.8 ± 0.8µM    |                          |                   |                     |                                              | Preclinical | [90]  |
|  | Compound 17                      | Small | 2.5 ± 2.1µM    |                          |                   |                     |                                              | Preclinical | [90]  |
|  | Compound 18p                     | Small | 34 ± 4 nM      | 290 ± 60 nM              | 808.7 ± 20.4      | Vero E6             | Wuhan/WIV04                                  | Preclinical | [91]  |
|  | NK01-63                          | Small | 16 nM          | 6 nM                     |                   | Huh-7ACE2           | USA_WA1/2020                                 | Preclinical | [92]  |
|  | Y180                             | Small | 8.1 nM         | 11.4 to 34.4 nM          | >81 µM            | Vero E6, Calu3      | HKU-001a, Alpha<br>Kappa, Theta              | Preclinical | [93]  |
|  | 3w                               | Small | 11.4 ±2.8 µM   | 111 nM                   |                   | Calu-3,<br>Vero 76  | SARS-CoV-2 isolate NK, Pango lineage B.1.513 | Preclinical | [94]  |
|  | F8-B6                            | Small | 1.57±0.08 µM   |                          | >100 µM           | Vero                |                                              | Preclinical | [95]  |
|  | x1187                            | Small |                |                          |                   |                     |                                              | Preclinical | [96]  |
|  | MPI3                             | Small | 8.5 ±1.5nM     |                          |                   | Vero E6             |                                              | Preclinical | [97]  |
|  | MPI5                             | Small | 33 ±2nM        |                          |                   | Vero E6             |                                              | Preclinical | [97]  |
|  | MPI8                             | Small | 105±22 nM      |                          |                   | Vero E6             |                                              | Preclinical | [97]  |
|  | MG-132                           | Small | 0.4µM          | 0.1µM                    | >2.9 µM           | Vero E6             | MN908947.3                                   | Preclinical | [98]  |
|  | Z-VAD(OMe)-FMK                   | Small | 0.59±0.44µM    | 1.88±0.52 µM             | >300µM            | Vero                |                                              | Preclinical | [99]  |
|  | 2a                               | Small | 0.18 ± 0.03 µM | Vero E6:0.035±0.001 µM   | >100µM            | Vero E6             | MN908947.3                                   | Preclinical | [100] |
|  | 3a                               | Small | 0.17 ± 0.02 µM | 0.032±0.001µM            | >100µM            | Vero E6             | MN908947.3                                   | Preclinical | [100] |
|  | 15h                              | Small | 1 ± 0.17 nM    | 0.16±0.03 µM             | >200µM            | Vero E6             | SARS-CoV-2/Canada/VIDO 01/2020               | Preclinical | [101] |
|  | 15l                              | Small | 19 ± 0.5 nM    | 0.30 ±0.02 µM            | >200µM            | Vero E6             | SARS-CoV-2/Canada/VIDO 01/2020               | Preclinical | [101] |
|  | F01                              | Small | 54 µM          | 150 µM                   | >400µM            | Vero-81             |                                              | Preclinical | [102] |
|  | Leupeptin                        | Small | 127.2µM        | 42.34 µM                 |                   | Vero                | Wuhan seafood market by the China CDC        | Preclinical | [103] |
|  | Cyclic peptide 1                 | Small | 70 ± 18 nM     | >50µM                    |                   | HEK293-ACE2-TMPRSS2 |                                              | Preclinical | [104] |
|  | Peptide2                         | Small |                | 11.8±0.6µM               |                   | HEK293-ACE2-TMPRSS2 |                                              | Preclinical | [104] |
|  | Peptide 5                        | Small |                | 13.0 ±0.6µM              |                   | HEK293-ACE2-TMPRSS2 |                                              | Preclinical | [104] |
|  | BBH-1                            | Small |                | 16.1µM                   | > 10 µM           | Vero E6<br>TMPRSS   | USA-WA1/2020                                 | Preclinical | [105] |
|  | BBH-2                            | Small |                | 15.4µM                   | > 10 µM           | Vero E6<br>TMPRSS   | USA-WA1/2020                                 | Preclinical | [105] |
|  | NBH-2                            | Small |                | 13.9µM                   | > 10 µM           | Vero E6<br>TMPRSS   | USA-WA1/2020                                 | Preclinical | [105] |
|  | Penicillin V derivative,10       | Small | 6.6 ±2.7 µM    |                          |                   |                     |                                              | Preclinical | [106] |
|  | C6 dibromopenicillin sulfones 28 | Small | 0.7 ±0.1 µM    |                          |                   |                     |                                              | Preclinical | [106] |
|  | C6 dibromopenicillin sulfones31  | Small | 0.6 ±0.1 µM    |                          |                   |                     |                                              | Preclinical | [106] |

|  |                                             |       |                                          |                                                                                          |               |            |                                      |                       |       |
|--|---------------------------------------------|-------|------------------------------------------|------------------------------------------------------------------------------------------|---------------|------------|--------------------------------------|-----------------------|-------|
|  | C6 dibromopenicillin sulfones <sup>32</sup> | Small | 0.5 ± 0.1 μM                             |                                                                                          |               |            |                                      | Preclinical           | [106] |
|  | SAA                                         | Small | 2.49 ± 0.57 μM                           |                                                                                          |               | VeroE6     | MN908947.3                           | Preclinical           | [107] |
|  | EGCG                                        | Small | 11.58 ± 1.62 μM                          |                                                                                          |               | VeroE6     | MN908947.3                           | Preclinical           | [107] |
|  | Oridonin                                    | Small | 2.16 ± 0.22 μM                           | 4.95 μM                                                                                  | 24.94 μM      | VeroE6     | MN908947.3                           | Preclinical           | [107] |
|  | 10a                                         | Small | 3889 ± 51 nM                             |                                                                                          |               | Vero E6    | SARS-CoV-2 (WIV04)                   | Preclinical           | [108] |
|  | 10b                                         | Small | 374 ± 6 nM                               | 1.06 μM                                                                                  |               | Vero E6    | SARS-CoV-2 (WIV04)                   | Preclinical           | [108] |
|  | 10c                                         | Small | 373 ± 11 nM                              |                                                                                          |               | Vero E6    | SARS-CoV-2 (WIV04)                   | Preclinical           | [108] |
|  | 14b                                         | Small | 0.41 ± 0.04 μM                           | 0.38 μM                                                                                  | > 100 μM      | Vero E6    |                                      | Preclinical           | [109] |
|  | MPI16                                       | Small | Enzymatic IC <sub>50</sub> : 150 nM      | 1.2 μM<br>1.2 μM,<br>0.58 μM,                                                            | > 200 μM      | Vero E6    | USA-WA1/2020, Beta and Delta         | Preclinical           | [110] |
|  | MPI17                                       | Small | Enzymatic IC <sub>50</sub> : 60 nM       | 1.2 μM,<br>1.8 μM,<br>1.1 μM                                                             | > 200 μM      | Vero E6    | USA-WA1/2020, Beta, Delta            | Preclinical           | [110] |
|  | MPI25                                       | Small | Enzymatic IC <sub>50</sub> : 650 nM      | 2.2 μM,<br>1.6 μM,<br>0.87 μM                                                            | 130.0 μM      | Vero E6    | USA-WA1/2020, Beta, Delta            | Preclinical           | [110] |
|  | MPI26                                       | Small | Enzymatic IC <sub>50</sub> : 530 nM      | 1.9 μM,<br>0.65 μM,<br>1.6 μM                                                            | 182.9 μM      | Vero E6    | USA-WA1/2020, Beta, Delta            | Preclinical           | [110] |
|  | MPI43                                       | Small | Enzymatic IC <sub>50</sub> : 45 ± 5 nM   | 0.61 μM,<br>0.36 μM,<br>1 μM                                                             | 34.2 μM       | Vero E6    | USA-WA1/2020, Beta, Delta            | Preclinical           | [111] |
|  | MPI44                                       | Small | Enzymatic IC <sub>50</sub> : 59 ± 7 nM   | 2.94 μM<br>0.86 μM<br>1.04 μM                                                            | 143.7 μM      | Vero E6    | USA-WA1/2020, Beta, Delta            | Preclinical           | [111] |
|  | MPI46                                       | Small | Enzymatic IC <sub>50</sub> : 120 ± 10 nM | 1.08 μM<br>2.28 μM<br>0.75 μM                                                            | 163.4 μM      | Vero E6    | USA-WA1/2020, Beta, Delta            | Preclinical           | [111] |
|  | JMX0286                                     | Small | 4.8 μM                                   | 2.3 μM                                                                                   | 53.1 μM       | A549-hACE2 | USA-WA1/2020                         | Preclinical           | [112] |
|  | JMX0301                                     | Small | 4.5 μM                                   |                                                                                          | 342.4 μM      | A549-hACE2 | USA-WA1/2020                         | Preclinical           | [112] |
|  | JMX0941                                     | Small | 3.9 μM                                   | 1.7 μM                                                                                   | 30 μM         | A549-hACE2 | USA-WA1/2020                         | Preclinical           | [112] |
|  | Compound 18                                 | Small | 6.1 ± 0.5 μM                             |                                                                                          | 55.2 ± 8.5 μM |            | Biochemical assay                    | Preclinical           | [113] |
|  | YH-6                                        | Small | 3.8 ± 0.3 nM                             | 21.2 ± 2.7 nM;<br>13.8 ± 1.3 nM;<br>7.57 ± 2.59 nM;<br>9.01 ± 2.45 nM;<br>17.1 ± 2.5 nM; | > 50000 nM    | 293TAT     | Fluorescence 3CLpro Inhibition Assay | Preclinical           | [114] |
|  | GC-14                                       | Small | 0.40 μM                                  | 1.1 ± 0.2 μM                                                                             | > 100 μM      | Vero E6    |                                      | Preclinical           | [115] |
|  | Tollovir (NLC-V)                            | Small |                                          |                                                                                          |               |            |                                      | Phase 2 (NCT05226767) |       |
|  | PBI-0451                                    | Small |                                          |                                                                                          |               |            |                                      | Phase 2 (NCT05543707) |       |
|  | EDP-235                                     | Small |                                          |                                                                                          |               |            |                                      | Phase 2 (NCT05616728) |       |
|  | AG7404                                      | Small | 47 ± 1.05 μM                             | 6.8 μM                                                                                   | 250 μM        | A549-ACE2  | Biochemical FRET assays              | Preclinical           | [116] |



|             |                            |          |                    |                             |                      |                       |                                      |                       |       |
|-------------|----------------------------|----------|--------------------|-----------------------------|----------------------|-----------------------|--------------------------------------|-----------------------|-------|
|             | SM141                      | Small    | 8.2 nM             | 8.2 ± 0.9 nM                |                      | A549                  | USA-WA1/2020/NR-52281                | Preclinical           | [117] |
|             | SM142                      | Small    | 14.7 nM            | 14.7 ± 2.2 nM               |                      | A549                  | USA-WA1/2020/NR-52281                | Preclinical           | [117] |
|             | 9a                         | Small    | 1.66 ± 0.02 μM     | 15.7 ± 8.3 μM               |                      | Vero E6-GFP           |                                      | Preclinical           | [118] |
|             | 9e                         | Small    | 2.63 ± 0.11 μM     | >100 μM                     |                      | Vero E6-GFP           |                                      | Preclinical           | [118] |
|             | Compound 13                | Small    | 4.9 μM             |                             |                      |                       | Fluorescence 3CLpro Inhibition Assay | Preclinical           | [119] |
|             | Bardoxolone                | Small    | 27.99±2.34 μM      | 0.43 μM<br>0.42 μM          | 24.36 μM<br>11.86 μM | Vero,<br>Calu-3       |                                      | Preclinical           | [120] |
|             | Bardoxolone methyl         | Small    | 5.81±0.79 μM       | 0.29 μM<br>0.20 μM          | 6.94 μM<br>1.16 μM   | Vero,<br>Calu-3       |                                      | Phase 2 (NCT04494646) | [120] |
|             | Bepriidil                  | Small    | 72±3 μM            | 0.86 μM<br>0.46 μM          |                      | Vero E6,<br>A549/ACE2 |                                      | Preclinical           | [121] |
|             | GD-9                       | Small    | 0.18±0.01 μM       | 2.64±0.62 μM                | 12.5±2.1 μM          | Vero E6               |                                      | Preclinical           | [122] |
|             | Azanitrile 8               |          |                    |                             |                      |                       |                                      | Preclinical           | [123] |
|             | Pyridyl ester 17           |          |                    |                             |                      |                       |                                      | Preclinical           | [123] |
|             | Compound 17a               | Small    | 40±8 nM            | >5 μM                       | >200 μM              | Vero E6               |                                      | Preclinical           | [124] |
|             | Peptidomimetic compound 15 | Small    | 15 ± 6 μM          |                             |                      |                       |                                      |                       | [125] |
|             | LY1                        | Small    | 3.9 μM             |                             |                      | Vero E6               |                                      | Preclinical           | [27]  |
|             | Schaftoside                | Small    | 1.73 ± 0.22 μmol/L | 11.83 ± 3.23 μmol/L         |                      | Vero E6               | nCoV-2019BetaCoV/Wuhan/WIV04/2019    | Preclinical           | [28]  |
|             | Acrylamide compound 2      | Small    | 10 μmol/L          |                             |                      |                       | Biochemical assay                    | Preclinical           | [126] |
|             | Acrylamide compound 5      | Small    | 17 μmol/L          |                             |                      |                       | Biochemical assay                    | Preclinical           | [126] |
|             | Compound 1                 | Small    | 0.021 μM           |                             |                      | Vero-81 cells         | hCoV-19_IPL_France strain            | Preclinical           | [127] |
|             | SPR39                      | Small    |                    | 1.5±0.3 μM                  | 100 μM               | Huh-7-ACE2 cells      | Munich 929                           | Preclinical           | [128] |
|             | 3CVL-4                     | Peptide  | 2.44±0.6 μM        |                             |                      |                       | nCoV-2019BetaCoV/Wuhan/WIV04/2019    | Preclinical           | [129] |
|             | NB1A2                      | Nanobody | 186.6±23.1nM       | pEC <sub>50</sub> :15.76 nM |                      |                       | MN908947.3                           | Preclinical           | [130] |
|             | NB2B4                      | Nanobody | 122 ± 7.7 nM       |                             |                      |                       | MN908947.3                           | Preclinical           | [130] |
|             |                            |          |                    |                             |                      |                       |                                      |                       |       |
| <b>NSP6</b> | 1,25-dihydroxyvitamin D3   | Small    |                    |                             |                      |                       | It abrogates NSP6-induced pyroptosis | Preclinical           | [131] |
|             | Metformin                  | Small    |                    |                             |                      |                       | It abrogates NSP6-induced pyroptosis | Preclinical           | [131] |
|             | Polydatin                  | Small    |                    |                             |                      |                       | It abrogates NSP6-induced pyroptosis | Preclinical           | [131] |
|             |                            |          |                    |                             |                      |                       |                                      |                       |       |
| <b>NSP7</b> | Licorice-saponin A3        | Small    |                    | 0.075 μM                    | >100 μM              | Caco-2                | nCoV-2019BetaCoV/Wuhan/WIV0          | Preclinical           | [132] |

|                                             |                                   |          |                              |                                                                  |                           |                                  |                                                              |                                                              |       |
|---------------------------------------------|-----------------------------------|----------|------------------------------|------------------------------------------------------------------|---------------------------|----------------------------------|--------------------------------------------------------------|--------------------------------------------------------------|-------|
|                                             |                                   |          |                              |                                                                  |                           |                                  | 4/2019                                                       |                                                              |       |
| <b>NSP9</b>                                 | Oridonin                          | Small    | 37 ± 10 µM                   |                                                                  |                           |                                  | UMPylation assay                                             | Preclinical                                                  | [133] |
|                                             | 2NSP23                            | Nanobody |                              |                                                                  |                           |                                  |                                                              | Preclinical                                                  | [134] |
|                                             | 2NSP90                            | Nanobody |                              |                                                                  |                           |                                  |                                                              | Preclinical                                                  | [134] |
|                                             |                                   |          |                              |                                                                  |                           |                                  |                                                              |                                                              |       |
| <b>RNA-dependent RNA polymerase (NSP12)</b> | Remdesivir (GS-5734)              | Small    |                              | 0.74–1.34 µM, <0.001 µM                                          | 0.3–2.2µM, >100 µM        | Vero E6, Huh7                    | BetaCov/Belgium/GHB-03021/2020, BetaCoV/Germany/BavPat1/2020 | Phase 4 (NCT04738045, NCT04944082, NCT04978259, NCT04779047) | [135] |
|                                             |                                   | Small    | 1.031 µM                     |                                                                  | >100 µM                   | LLC-MK2 cells                    | CGMH-CGU-01                                                  |                                                              | [136] |
|                                             | VV116 (JT001)                     | Small    | 0.67 ± 0.24 µM               | 0.35 ± 0.09 µM                                                   | 280.19 ± 15.39 µM         | Vero E6                          | 2019-nCoV-WIV04                                              | Approved, Phase 3 (NCT05279235, NCT05341609, NCT05582629)    | [137] |
|                                             | Molnupiravir (MK-4482, EIDD-2801) | Small    | 48h: 0.30 µM<br>72h: 0.08 µM |                                                                  | >10 µM                    | Vero E6, Calu-3                  | USA-WA1 / 2020                                               | Approved, Phase 3 (NCT05459532, NCT05595824, NCT04939428)    | [138] |
|                                             |                                   |          |                              | 0.22 µM                                                          |                           | HEK293T                          |                                                              |                                                              | [139] |
|                                             | Bemnifosbuvir (AT-527, RO7496998) | Small    |                              | > 100 µM, > 100 µM, > 10 µM                                      | > 100 µM > 100 µM > 10 µM | VeroE6-GFP Huh7 HAEC             | BetaCov/Belgium/GHB-03021/2020                               | Phase 3 (NCT05629962)                                        | [135] |
|                                             |                                   |          |                              | 1.8 ± 0.3 µM                                                     | > 100 µM                  | BHK-21                           | USA-WA1/2020                                                 |                                                              | [140] |
|                                             | GS-5245                           | Small    |                              |                                                                  |                           |                                  |                                                              | Phase 3 (NCT05603143)                                        |       |
|                                             | GS-441524                         | Small    |                              | 2454 ± 63 nM                                                     | >10 µM                    | Human bronchial epithelial cells | USA-WA1                                                      | Phase 1 (NCT04859244)                                        | [141] |
|                                             | GS-621763                         | Small    |                              | 125 ± 22 nM                                                      | >10 µM                    | Human bronchial epithelial cells | USA-WA1                                                      | Preclinical                                                  | [141] |
|                                             | ODBG-P-RVn                        | Small    |                              | 420 ± 90 nM, 100 ± 5 nM                                          | >100 µM                   | Vero E6, Huh7/NCI-H358           | USA-WA1                                                      | Preclinical                                                  | [142] |
|                                             | ATV006                            | Small    |                              | B.1: 1.36 µM, Beta: 1.127 µM, Delta: 0.349 µM, Omicron: 0.106 µM | 128 µM                    | Vero E6                          | B.1, Beta, Delta, Omicron                                    | Preclinical                                                  | [143] |
|                                             | MMT5-14                           | Small    |                              | 2.5 µM<br>15.9 µM<br>1.7 µM<br>5.6 µM                            |                           | Vero E6                          | Alpha(B.1.1.7) Beta(B.1.351), Gamma(P.1), Delta(B.1.617.2)   | Preclinical                                                  | [144] |
|                                             | 4'-fluorouridine (EIDD-2749)      | Small    |                              | 2.47 µM                                                          | 467.9 µM                  | HAEC                             | USA-WA1 / 2020                                               | Preclinical                                                  | [145] |

|  |                            |          |                                                 |                                                  |                                                                              |                                           |                                           |                       |       |
|--|----------------------------|----------|-------------------------------------------------|--------------------------------------------------|------------------------------------------------------------------------------|-------------------------------------------|-------------------------------------------|-----------------------|-------|
|  | Favipiravir (T-705)        | Small    |                                                 | Replication: 207.1 $\mu$ M<br>CPE: 118.3 $\mu$ M |                                                                              | Vero E6                                   | BetaCoV/Germany/BavPat1/2020              | Phase 4 (NCT04359615) | [146] |
|  | Galidesivir (BCX4430)      | Small    |                                                 | 48 $\mu$ M,<br>58 $\mu$ M,<br>24 $\mu$ M         |                                                                              | Huh7.5<br>Calu-1<br>A549                  | human/Denmark/DK-AHH1/2020                | Phase 1 (NCT03891420) | [147] |
|  | 5-Hydroxymethyl tubercidin | Small    |                                                 |                                                  | > 50 $\mu$ M<br>> 50 $\mu$ M<br>> 20 $\mu$ M<br>> 20 $\mu$ M<br>> 20 $\mu$ M | Caco-2<br>MRC5<br>Huh7<br>A549<br>Vero E6 | JP/TY/WK-521                              | Preclinical           | [148] |
|  | 5-Iodotubercidin           | Small    |                                                 | 0.75 $\mu$ M                                     | 59.46 $\mu$ M                                                                | HEK293T                                   |                                           | Preclinical           | [149] |
|  | HeE1-2Tyr (compound 16)    | Small    | 27.6 $\pm$ 2.1 $\mu$ M                          | 653.5 nM<br>949.3 nM<br>1.062 $\mu$ M            | > 50 $\mu$ M<br>> 50 $\mu$ M<br>> 50 $\mu$ M                                 | Vero<br>CaCo-2<br>CRFK                    | human/Czech Republic/951/2020             | Preclinical           | [150] |
|  | 6d5                        | Small    | 1.11 $\pm$ 0.05 $\mu$ M                         |                                                  | > 100 $\mu$ M                                                                | HEK293T                                   |                                           | Preclinical           | [151] |
|  | GSK-650394                 | Small    | 29 to 31 $\mu$ M                                | 7.6 $\mu$ M                                      |                                                                              | Vero E6                                   | England/2/2020                            | Preclinical           | [152] |
|  | C646                       | Small    | 6.1 to 7.8 $\mu$ M                              | 19 $\mu$ M                                       |                                                                              | Vero E6                                   | England/2/2020                            | Preclinical           | [152] |
|  | BH3I-1                     | Small    | 13 to 14 $\mu$ M                                | 77 $\mu$ M                                       |                                                                              | Vero E6                                   | England/2/2020                            | Preclinical           | [152] |
|  | 6-72-2a                    | Small    |                                                 | 1.41 $\mu$ M<br>1.18 $\mu$ M                     | > 100 $\mu$ M<br>> 100 $\mu$ M                                               | HEK293T<br>A549                           |                                           | Preclinical           | [153] |
|  | 4-46b                      | Small    |                                                 | 1.70 $\mu$ M<br>1.58 $\mu$ M                     | 75.52 $\mu$ M<br>76.23 $\mu$ M                                               | HEK293T<br>A549                           |                                           | Preclinical           | [153] |
|  | Sangivamycin               | Small    | 34 $\pm$ 1 nM<br>14 $\pm$ 2 nM<br>61 $\pm$ 8 nM |                                                  | 491 nM<br>285 nM<br>322 nM                                                   | Vero E6<br>Caco-2<br>Calu-3               | USA-WA1 / 2020                            | Preclinical           | [154] |
|  | Corilagin (RAIS-37)        | Small    |                                                 | 0.13 $\mu$ mol/L                                 |                                                                              | Vero E6 cells                             | A strain isolated from a COVID-19 patient | Preclinical           | [155] |
|  | Gossypol                   | Small    | 14.15 $\mu$ M                                   | 0.31 $\mu$ M,<br>0.76 $\mu$ M                    | 39.57 $\mu$ M                                                                | Vero E6,<br>Calu-3                        | delta variant SARS-CoV-2/SZTH12           | Preclinical           | [156] |
|  | ATV041                     | Small    |                                                 | 1.15 $\mu$ M                                     |                                                                              | L929 cells                                | MHV-A59                                   | Preclinical           | [157] |
|  | CM12.1                     | Antibody |                                                 |                                                  |                                                                              | Vero E6                                   | 2019n-CoV/USA-WA1/2019                    | Preclinical           | [158] |
|  | Suramin                    | Large    | 0.26 $\pm$ 0.03 $\mu$ M                         | 2.93 $\pm$ 0.28 $\mu$ M                          | >1000 $\mu$ M                                                                | Vero E6                                   | Wuhan/WIV04/2019                          | Preclinical           | [159] |
|  |                            |          |                                                 | 20 $\pm$ 2.7 $\mu$ M                             |                                                                              | Vero E6                                   | SARS-CoV-2/Leiden-0002                    | Preclinical           | [160] |
|  |                            |          |                                                 |                                                  |                                                                              |                                           |                                           |                       |       |
|  | <b>Helicase (NSP13)</b>    | Small    | 0.42 $\pm$ 0.23 $\mu$ M                         | 8.8 $\pm$ 5.6 $\mu$ M                            | >100 $\mu$ M                                                                 | Vero E6                                   |                                           | Preclinical           | [161] |
|  | C2 (5645-0263)             | Small    | 42 $\pm$ 3 $\mu$ M                              |                                                  |                                                                              |                                           | Biochemical assay using purified NSP13    | Preclinical           | [162] |
|  | FPA-124                    | Small    | 9 $\mu$ M                                       | 14 $\mu$ M                                       |                                                                              | Vero E6                                   | England/2/2020                            | Preclinical           | [163] |
|  | SSYA10-001                 | Small    | 14 to 21 $\mu$ M                                | 81 $\mu$ M                                       |                                                                              | Vero E6                                   | England/2/2020                            | Preclinical           | [163] |
|  | Ranitidine bismuth citrate | Small    | ~0.7 $\mu$ M                                    | 2.3 $\pm$ 0.5 $\mu$ M                            | 2243 $\pm$ 43 $\mu$ M                                                        | Vero E6                                   | HKU-001a                                  | Preclinical           | [164] |
|  | Punicalagin                | Small    | 0.43 $\mu$ M                                    | 347 nM<br>196 nM                                 | 46.77 $\mu$ M<br>32.92 $\mu$ M                                               | A549-ACE2<br>Vero                         | BetaCov/Shenzhen/SZTH-003/2020            | Preclinical           | [165] |
|  | Licoflavone C              | Small    | 1.34 $\pm$ 0.31 $\mu$ M                         | >100 $\mu$ M                                     | >100 $\mu$ M                                                                 | Vero-E6-GFP                               |                                           | Preclinical           | [166] |
|  |                            |          |                                                 |                                                  |                                                                              |                                           |                                           |                       |       |
|  |                            |          |                                                 |                                                  |                                                                              |                                           |                                           |                       |       |

|                                       |                                |       |                                                        |                  |                           |                             |                                             |                       |       |
|---------------------------------------|--------------------------------|-------|--------------------------------------------------------|------------------|---------------------------|-----------------------------|---------------------------------------------|-----------------------|-------|
| <b>Exoribonuclease (NSP14)</b>        | Sinefungin                     | Small | 18.2 ± 2 nM                                            |                  |                           |                             | Methyltransferase assay                     | Preclinical           | [167] |
|                                       | Compound 16                    | Small | 3 ± 0.5 nM                                             |                  |                           |                             | Methyltransferase assay                     | Preclinical           | [167] |
|                                       | Compound #79                   | Small | 19.43±8.37 μM                                          |                  |                           |                             | FRET exonuclease activity assay             | Preclinical           | [4]   |
|                                       | Compound #96 (Isobavachalcone) | Small | 17.43±1.39 μM                                          |                  |                           |                             | FRET exonuclease activity assay             | Preclinical           | [4]   |
|                                       | Compound#102 (Sofalcone)       | Small | 21.99 ± 6.02 μM                                        |                  |                           |                             | FRET exonuclease activity assay             | Preclinical           | [4]   |
|                                       | Patulin                        | Small | 1.8 (1.6 to 2.1) μM                                    |                  |                           | Vero E6                     | BetaCoV/England/02/2020 (EPI_ISL_407073)    | Preclinical           | [168] |
|                                       | Pyridostatin                   | Small | 3.1 to 3.19 μM                                         | 3.58±0.16 μM     | 59.3±21.6 μM              | Huh 7                       | Belgium/GHB-03021/2020                      | Preclinical           | [169] |
|                                       | Reactive Blue 2                | Small | 1.5±0.28 to 4.12±0.74 μM                               | 16.3±0.3 μM      | 52.6±10.2 μM              | Huh 7                       | Belgium/GHB-03021/2020                      | Preclinical           | [169] |
|                                       | A-2                            | Small | 20.7 ± 0.5 μM                                          |                  |                           |                             |                                             | Preclinical           | [170] |
|                                       | B-1                            | Small | 32.2 ± 4.5 μM                                          |                  |                           |                             |                                             | Preclinical           | [170] |
|                                       | Compound 25                    | Small | 0.019±0.02 μM                                          |                  |                           |                             | Filter-binding assay using SARS-CoV-2 NSP14 | Preclinical           | [3]   |
|                                       | ZINC33037945                   | Small | 125 ± 6 μM                                             |                  | >100 μM                   | Biochemical assays          | Biochemical assays                          | Preclinical           | [171] |
|                                       | SS148                          | Small | 70 ± 6 nM                                              |                  |                           | Radiometric assays          | Radiometric assays                          | Preclinical           | [172] |
|                                       | DS0464                         | Small | 1.1 ± 0.2 μM                                           |                  |                           | Radiometric assays          | Radiometric assays                          | Preclinical           | [172] |
|                                       | Inhibitor 10                   | Small | 0.093 μM                                               | 0.72 μM          | >100 μM                   | A549                        | SARS-CoV-2                                  | Preclinical           | [173] |
|                                       |                                |       |                                                        |                  |                           |                             |                                             |                       |       |
|                                       |                                |       |                                                        |                  |                           |                             |                                             |                       |       |
| <b>Endoribonuclease (NSP15)</b>       | NSC95397                       | Small | 43 μM                                                  |                  |                           |                             |                                             | Preclinical           | [174] |
|                                       | Tipiracil                      | Small |                                                        |                  |                           | A549                        | USA-WA1 / 2020                              | Preclinical           | [175] |
|                                       | Exebryl-1                      | Small | 9.27 μM                                                | 65.6 μM<br>10 μM | >100 μM<br>52 μM<br>61 μM | Calu-3<br>Vero 76<br>Calu-2 | USA WA1 / 2020                              | Preclinical           | [176] |
|                                       |                                |       |                                                        |                  |                           |                             |                                             |                       |       |
|                                       |                                |       |                                                        |                  |                           |                             |                                             |                       |       |
| <b>2'-O-methyltransferase (NSP16)</b> | 3-deazaneplanocin A (DZNep)    | Small | 586 nM,<br>579 nM                                      |                  |                           | A549-ACE2,<br>A549-RFP-ACE2 | SARS-CoV-2-MUC-IMB-1                        | Preclinical           | [177] |
|                                       | Sinefungin                     | Small | 138 ± 30 nM                                            |                  |                           | Biochemical tests           | Biochemical tests                           | Preclinical           | [178] |
|                                       | 2a                             | Small | 4.0 ± 0.5 nM                                           |                  | >100 μM                   | Biochemical assay           | Biochemical assay                           | Preclinical           | [179] |
|                                       | Aurintricarboxylic acid        | Small | SARS-CoV nsp14: 6.4 μM<br>SARS-CoV nsp14/nsp16: 2.1 μM |                  |                           |                             |                                             | Preclinical           | [180] |
|                                       |                                |       |                                                        |                  |                           |                             |                                             |                       |       |
|                                       |                                |       |                                                        |                  |                           |                             |                                             |                       |       |
| <b>Spike</b>                          | Clofazimine                    | Small | >100 μM                                                | 0.31 μM          |                           | Vero-E6                     | USA-WA1 / 2020                              | Phase 2 (NCT04465695) | [181] |
|                                       | ALD-R491                       | Small | 13.5 nM (MOI=0.5),<br>34.7 nM                          | 0.036 μM         | >10 μM                    | HEK-GFP                     |                                             | Preclinical           | [182] |

|  |                       |                           |                                                                                                                                                                       |                               |                            |                                   |                                                   |                                |       |
|--|-----------------------|---------------------------|-----------------------------------------------------------------------------------------------------------------------------------------------------------------------|-------------------------------|----------------------------|-----------------------------------|---------------------------------------------------|--------------------------------|-------|
|  |                       |                           | (MOI=5),<br>64.9 nM<br>(MOI=50)                                                                                                                                       |                               |                            |                                   |                                                   |                                |       |
|  | Sertraline            | Small                     | Pseudotyped:<br>0.649 ± 0.128<br>µM<br>0.295 ± 0.062<br>µM<br>1.344 ± 0.721<br>µM<br>Authentic<br>(Vero E6),<br>1.638 ± 0.622<br>µM(WT)<br>4.137 ± 0.930<br>µM(Delta) |                               |                            | ACE2/293T,<br>Vero E6,<br>Caco-2, | WT,<br>Delta                                      | Preclinical                    | [183] |
|  | DRI-C23041            | Small                     | SARS-CoV-2-<br>S-RBD-<br>hACE2<br>Binding: 0.52<br>µM                                                                                                                 |                               |                            |                                   |                                                   | Preclinical                    | [184] |
|  |                       |                           | PSV: 5.6 µM                                                                                                                                                           |                               |                            | HEK293T-<br>ACE2                  |                                                   | Preclinical                    | [184] |
|  |                       |                           | PSV: 7.4 µM                                                                                                                                                           |                               |                            | Vero-E6                           |                                                   | Preclinical                    | [184] |
|  | AB-00011778           | Small                     | 1 µM,<br>0.25 µM,<br>1 µM                                                                                                                                             | 250 nM                        | >50 µM<br>>30 µM<br>>30 µM | 293T-ACE2,<br>A549-ACE2,<br>Calu3 | Wuhan-HU-1                                        | Preclinical                    | [185] |
|  | Aminobenzotropine     | Small                     | 0.21 µM                                                                                                                                                               |                               | >200 µM                    | 293T                              | D614G                                             | Preclinical                    | [186] |
|  | 15f                   | Small                     |                                                                                                                                                                       | 1.45 µM                       | 323 µM                     | Huh-7                             | Wuhan-Hu-1<br>pseudovirus                         | Preclinical                    | [187] |
|  | MU-UNMC-2             | Small                     | 1.72 µM                                                                                                                                                               |                               | >100 µM                    | UNCN1T                            | USA-WA1 /<br>2020                                 | Preclinical                    | [188] |
|  |                       |                           | 1.63 µM                                                                                                                                                               |                               | 7.13 µM                    | Vero-STAT1<br>knockout cells      | USA-WA1 /<br>2020                                 | Preclinical                    | [188] |
|  |                       |                           | 3.0 µM                                                                                                                                                                |                               |                            | Calu-3                            | South African<br>variant<br>B.1.351               | Preclinical                    | [188] |
|  |                       |                           | 1.39 µM                                                                                                                                                               |                               |                            | Calu-3                            | Scotland<br>variant<br>B.1.222                    | Preclinical                    | [188] |
|  | H69C2                 | Small                     | 85.75 µM                                                                                                                                                              |                               | > 250 µM                   | Vero E6                           | nCoV-<br>2019BetaCoV<br>/ Wuhan /<br>WIV04 / 2019 | Preclinical                    | [189] |
|  | P2119                 | Small                     |                                                                                                                                                                       | 22 ± 5.6 ng/mL                |                            |                                   |                                                   | Preclinical                    | [190] |
|  | P2165                 | Small                     |                                                                                                                                                                       | 37 ± 4.7 ng/mL                |                            |                                   |                                                   | Preclinical                    | [190] |
|  | 6-Thioguanine         | Small                     |                                                                                                                                                                       | 0.55 µM                       | >40 µM                     | Calu-3                            |                                                   | Preclinical                    | [191] |
|  | Glycyrrhetic acid     | Small                     |                                                                                                                                                                       | 3.17 µM                       | >100 µM                    | Vero E6                           | nCoV-<br>2019BetaCoV/<br>Wuhan/WIV0<br>4/2019     | Preclinical                    | [132] |
|  | Raloxifene            | Small                     |                                                                                                                                                                       |                               |                            |                                   |                                                   | Phase 2/3<br>(NCT05172<br>050) | [192] |
|  | Amiodarone            | Small                     |                                                                                                                                                                       |                               |                            |                                   |                                                   | Phase 2/3<br>(NCT04351<br>763) | [192] |
|  | UA-30                 | Saponin<br>macromolecular |                                                                                                                                                                       | 9.84±0.65 µM,<br>2.05±0.27 µM | >100 µM,<br>>100 µM        | 293T-ACE2,<br>Vero-E6             | Wuhan-HU-1                                        | Preclinical                    | [193] |
|  | Polystyrene sulfonate | Macromolecular            | <1 g/L                                                                                                                                                                |                               |                            | Caco-2                            | France/IDF03<br>72/2020                           | Preclinical                    | [194] |
|  | FBP                   | Peptide                   | 2.9 µg/mL<br>3.0 µg/mL<br>3.9 µg/mL                                                                                                                                   |                               |                            | Vero E6                           | SARS-CoV-2<br>(HKU001a),<br>SARS-CoV-2            | Preclinical                    | [195] |

|  |                                           |                              |                                                                                                                                                                                                     |  |          |                                           |                                                                                                                |                                   |       |
|--|-------------------------------------------|------------------------------|-----------------------------------------------------------------------------------------------------------------------------------------------------------------------------------------------------|--|----------|-------------------------------------------|----------------------------------------------------------------------------------------------------------------|-----------------------------------|-------|
|  |                                           |                              |                                                                                                                                                                                                     |  |          |                                           | (B.1.1.63),<br>SARS-CoV-2<br>(B.1.617.2)                                                                       |                                   |       |
|  | R7-02                                     | Peptide                      | 138.9 nM                                                                                                                                                                                            |  |          | hACE2-293T<br>cells                       | Pseudotyped<br>SARS-CoV-2                                                                                      | Preclinical                       | [196] |
|  | TGCGTNCMG<br>KLKCNRC                      | Peptide                      |                                                                                                                                                                                                     |  |          | Vero E6                                   | SARS-CoV-2<br>(NCCP No.<br>43326)                                                                              | Preclinical                       | [197] |
|  | AMK-1057                                  | Peptide                      |                                                                                                                                                                                                     |  |          |                                           |                                                                                                                | Preclinical                       | [198] |
|  | HR1MFd                                    | Peptide                      | 1.23±0.18 µM,<br>1.61±0.29 µM,                                                                                                                                                                      |  |          | Caco-2,<br>Huh-7                          | Pseudotyped<br>virus encoding<br>SARS-CoV-2<br>spike /variants                                                 | Preclinical                       | [199] |
|  | 5-Helix                                   | Peptide                      | 293 nM                                                                                                                                                                                              |  | 19.89 nM | Calu-3                                    | nCoV-SH01                                                                                                      | Preclinical                       | [200] |
|  | 5HB-H2                                    | Peptide                      | 0.59 µM;<br>1.63 µM;<br>3.08 µM;<br>3.25 µM;<br>2.66 µM                                                                                                                                             |  |          | 293T-hACE2                                | Wuhan-Hu-1,<br>B.1.1.529,<br>B.1.351,<br>B.1.617.1,<br>B.1.617.2,                                              | Preclinical                       | [201] |
|  | S-20-1                                    | Peptide                      | Huh-7:<br>0.54 µM<br>3.92 µM<br>1.50 µM<br>9.63 µM<br>4.41 µM<br>10.23 µM<br>2.48 µM<br><br>Caco-2:<br>4.44<br>µM(B.1.1.7)<br>6.37<br>µM(B.1.351)<br>5.35<br>µM(B.1.617.2)<br>4.69<br>µM(B.1.1.529) |  | 692.7 µM | Huh-7,<br>Caco-2                          | B.1.1.7,<br>B.1.351,<br>P.1,<br>C.37,<br>B.1.617.2,<br>B.1.1.529,<br>SARS-CoV-<br>2(N501Y,<br>K417N,<br>E484K) | Preclinical                       | [202] |
|  | 4H30                                      | Peptide                      | 44 nM,<br>67 nM                                                                                                                                                                                     |  |          | VeroE6<br>VeroE6-T                        | Omicron,<br>Delta                                                                                              | Preclinical                       | [203] |
|  | SIH-5                                     | Helix-<br>hairpin<br>peptide | 326 pM                                                                                                                                                                                              |  |          | HEK293T-<br>hACE2                         | SARS-CoV-2                                                                                                     | Preclinical                       | [204] |
|  | Frogdefensin-<br>derived basic<br>peptide | Peptide                      |                                                                                                                                                                                                     |  |          | Calu3<br>293T/ACE2                        | SARS-CoV-<br>2(HKU001a),<br>Delta,<br>Omicron                                                                  | Preclinical                       | [205] |
|  | EK1                                       | Peptide                      | B.1.1.7:1.24<br>µM<br>B.1.1.248:1.25<br>µM                                                                                                                                                          |  |          | Calu-3 and<br>Caco2                       | B.1.1.7<br>(Alpha),<br>B.1.1.248<br>(Gamma)                                                                    | Phase Ib/IIa<br>(CTR20220<br>003) | [206] |
|  | EK1C4                                     | Peptide                      | B.1.1.7:5.45<br>nM<br>B.1.1.248:6.55<br>nM                                                                                                                                                          |  |          | Calu-3 and<br>Caco2                       | B.1.1.7<br>(Alpha),<br>B.1.1.248<br>(Gamma)                                                                    | Preclinical                       | [206] |
|  |                                           | Peptide                      | 36.5 nM                                                                                                                                                                                             |  | >5 µM    |                                           |                                                                                                                | Preclinical                       | [207] |
|  | longHR2_42                                | Peptide                      | Caco-<br>2+hACE2:<br>1.5<br>nM(Wuhan),<br>0.6<br>nM(Alpha),<br>5.0<br>nM(Delta),<br>15.6<br>nM(Omicron)                                                                                             |  |          | Caco-<br>2+hACE2<br><br>Vero<br>E6+TMRSS2 | Wuhan<br>Alpha,<br>D6124G,<br>Delta,<br>Omicron                                                                | Preclinical                       | [208] |

|  |         |             |                                                                                                                                                                                                                                                                                                                                                  |            |                                                    |                                |                                                                            |             |       |
|--|---------|-------------|--------------------------------------------------------------------------------------------------------------------------------------------------------------------------------------------------------------------------------------------------------------------------------------------------------------------------------------------------|------------|----------------------------------------------------|--------------------------------|----------------------------------------------------------------------------|-------------|-------|
|  |         |             | Vero<br>E6+TMPRSS:<br>0.9<br>nM(D614G),<br>0.9<br>nM(Delta),<br>4.1<br>nM(Omicron)                                                                                                                                                                                                                                                               |            |                                                    |                                |                                                                            |             |       |
|  | P29S1   | Peptide     | 0.3±0.1 μM                                                                                                                                                                                                                                                                                                                                       | 3.1±0.4 μM |                                                    | Vero E6                        | 2019-<br>nCoV/USA-<br>IL1/2020                                             | Preclinical | [209] |
|  | EKL1C   | Lipopeptide | 45±6 nmol/L,<br>40±5 nmol/L,<br>37±9 nmol/L                                                                                                                                                                                                                                                                                                      |            | 10 μmol/L,<br>13.81 μmol<br>/L,<br>8.49 μmol/<br>L | Huh-7,<br>Caco-2,<br>293T/ACE2 | Pseudotyped<br>virus                                                       | Preclinical | [210] |
|  | IPB02V3 | Lipopeptide | 293T/ACE2:<br>18.53±1.70nM<br>17.00±2.15nM<br>19.10±3.69nM<br>16.64±0.04nM<br>17.54±1.75nM<br>12.81±1.63nM<br>16.72±0.70nM<br>6.35±0.75nM<br>Huh-7:<br>16.29±1.26nM<br>18.57±1.61nM<br>14.03±1.81nM<br>18.02±3.88nM<br>24.52±7.02nM<br>15.37±3.73nM<br>19.50±7.29nM<br>11.52±3.20nM<br>Vero:<br>23.17±0.97nM<br>(WT)<br>2.56±0.14nM<br>(Omicron) |            |                                                    | 293T/ACE2<br>Huh-7<br>Vero     | WT,<br>D614G,<br>Alpha,<br>Beta,<br>Gamma,<br>Delta,<br>Lambda,<br>Omicron | Preclinical | [211] |
|  |         | Lipopeptide | 15.3±0.76 nM<br>4.69±0.37 nM<br>8.21±3.11 nM<br>5.64±0.05 nM<br>3.9±1.61 nM<br>3.91±0.95 nM                                                                                                                                                                                                                                                      |            |                                                    | 293T/ACE2                      | Wuhan-Hu-1<br>BA.1<br>BA.2<br>BA.2.12.1<br>BA.3<br>BA.4/5                  | Preclinical | [212] |
|  | IPB24   | Lipopeptide | 293T/ACE2:<br>5.51±0.54nM<br>6.17±0.05nM<br>5.94±0.19nM<br>5.65±0.01nM<br>6.41±0.17nM<br>4.94±0.05nM<br>6.57±0.02nM<br>4.51±0.30nM<br>Huh-7:<br>2.43±0.07nM<br>3.15±0.06nM<br>5.42±0.30nM<br>3.29±0.76nM<br>3.95±0.71nM<br>3.46±0.13nM<br>4.10±0.69nM<br>2.56±0.47nM<br>Vero:<br>10.69±1.18nM<br>(WT)<br>0.44±0.01nM                             |            |                                                    | 293T/ACE2<br>Huh-7<br>vero     | WT,<br>D614G,<br>Alpha,<br>Beta,<br>Gamma,<br>Delta,<br>Lambda,<br>Omicron | Preclinical | [211] |

|  |                                                                  |                    |                                                                                              |                                    |                      |                              |                                                                                                                    |                          |       |
|--|------------------------------------------------------------------|--------------------|----------------------------------------------------------------------------------------------|------------------------------------|----------------------|------------------------------|--------------------------------------------------------------------------------------------------------------------|--------------------------|-------|
|  |                                                                  |                    | (Omicron)                                                                                    |                                    |                      |                              |                                                                                                                    |                          |       |
|  |                                                                  | Lipopeptide        | 4.09±0.44 nM<br>3.83±0.56 nM<br>0.91±0.47 nM<br>1.19±0.23 nM<br>0.98±0.12 nM<br>1.00±0.18 nM |                                    |                      | 293T/ACE2                    | Wuhan-Hu-1<br>BA.1<br>BA.2<br>BA.2.12.1<br>BA.3<br>BA.4/5                                                          | Preclinical              | [212] |
|  | F9-C2                                                            | Engineered protein | 12 nM                                                                                        | 33 nM<br>15 nM<br>>184 nM<br>18 nM |                      | Vero E6                      | Beta,<br>Gamma,<br>Delta,<br>Omicron                                                                               | Preclinical              | [213] |
|  | FSR16m                                                           | Engineered protein | 3.4 ng/mL,<br>2.2 ng/mL,<br>3.3 ng/mL,<br>44.7 ng/mL,<br>7.4 ng/mL,<br>33.3 ng/mL            |                                    |                      | Vero-hACE2-TMPRSS2           | B.1.351,<br>B.1.617.2,<br>B.1.617.2/<br>AY1,<br>B.1.1.519/<br>BA.1,<br>B.1.1.519/<br>BA.1.1,<br>B.1.1.519/<br>BA.2 | Preclinical              | [214] |
|  | FSR22                                                            | Engineered protein | 57.2 ng/mL,<br>41.7 ng/mL,<br>44.2 ng/mL,<br>169.2 ng/mL,<br>41.2 ng/mL,<br>216.2 ng/mL      |                                    |                      | Vero-hACE2-TMPRSS2           | B.1.351,<br>B.1.617.2,<br>B.1.617.2/<br>AY1,<br>B.1.1.519/<br>BA.1,<br>B.1.1.519/<br>BA.1.1,<br>B.1.1.519/<br>BA.2 | Preclinical              | [214] |
|  | Mosaic-8                                                         | Nanoparticle       |                                                                                              |                                    |                      | Vero E6                      | Beta,<br>Delta                                                                                                     | Preclinical              | [215] |
|  | H84T-BanLec                                                      | Engineered protein | 5.2±1.1 nM<br>3.9±0.8 nM<br>2.6±0.5 nM                                                       |                                    |                      | Vero E6                      | Wild-type<br>Delta,<br>Omicron                                                                                     | Preclinical              | [216] |
|  | Berbamine hydrochloride                                          | Small              |                                                                                              | 1.732 µM<br>1.887 µM               | 66.88 µM<br>31.86 µM | Vero E6,<br>Caco2            | SARS-CoV-2<br>(WIV-04)                                                                                             | Preclinical              | [217] |
|  | Ceftazidime                                                      | Small              | 40±1 µM<br>113±1 µM<br>28±1 µM                                                               |                                    |                      | HPAEpiC,<br>293T,<br>Vero E6 |                                                                                                                    | Preclinical              | [218] |
|  | Diltiazem                                                        | Small              | RNA copies:<br>11.99 µM<br>Virus titers:<br>9.511 µM                                         |                                    | 279.2 µM             | Vero-E6                      | SARS-CoV-2/HRB25/human/2020/CHN                                                                                    | Phase 2<br>(NCT05563168) | [219] |
|  | N-(2-hydroxypropyl)-3-trimethylammonium chitosan chloride (HTCC) | Polymeric          | 12.5 µM/mL                                                                                   |                                    | 158.0 µM/mL          | Vero-E6                      | SARS-CoV-2 (026V-03883)                                                                                            | Preclinical              | [220] |
|  | nCoV-S1-Apt1                                                     | Aptamer            | 80.12 nM                                                                                     |                                    |                      |                              |                                                                                                                    | Preclinical              | [221] |
|  | [SARSHRC-PEG4]2-cho1                                             | Peptide            | ~300 nM<br>~5 nM                                                                             |                                    |                      | VeroE6,<br>VeroE6-TMPRSS2    |                                                                                                                    | Preclinical              | [222] |
|  | 33-7 <sup>HR1</sup>                                              | Peptide            | 49 ng/mL<br>7.2 ng/mL<br>7.6 ng/mL<br>6.5 ng/mL<br>12 ng/mL<br>45 ng/mL<br>260 ng/mL         |                                    |                      | Vero E6                      | B.1,<br>B.1.1,<br>B.1.1.7,<br>B.1.351,<br>B.1.525,<br>B.1.128,<br>B.1.1.529                                        | Preclinical              | [223] |



|                     |                              |                     |                         |                                                                                                                                                                                                                                   |                                               |                                        |                                                              |             |       |
|---------------------|------------------------------|---------------------|-------------------------|-----------------------------------------------------------------------------------------------------------------------------------------------------------------------------------------------------------------------------------|-----------------------------------------------|----------------------------------------|--------------------------------------------------------------|-------------|-------|
|                     | hACE221-55A36K-F40E          | Peptide             | 3.6 $\mu$ M             |                                                                                                                                                                                                                                   |                                               |                                        |                                                              | Preclinical | [224] |
|                     | Mannose-binding lectin (MBL) | Protein             | 1.7nM                   | 0.27nM                                                                                                                                                                                                                            |                                               | 293T                                   | MN908947                                                     | Preclinical | [225] |
|                     | HCC1                         | Small               |                         | 125.6 $\mu$ M                                                                                                                                                                                                                     | 391.5 $\mu$ M                                 | 293T                                   |                                                              | Preclinical | [226] |
|                     | Dichlorocyclizine            | Small               |                         | MA104:<br>4.53 $\mu$ M<br>293ACE2:<br>2.34 $\mu$ M<br>Huh7:<br>3.05 $\mu$ M<br>Vero E6:<br>2.9 $\pm$ 1.6 $\mu$ M (WT),<br>4.52 $\pm$ 2.4 $\mu$ M (Alpha),<br>3.38 $\pm$ 1.0 $\mu$ M (Beta),<br>2.57 $\pm$ 1.0 $\mu$ M (Delta)     | >100 $\mu$ M<br>>100 $\mu$ M<br>69.15 $\mu$ M | MA104,<br>293ACE2,<br>Huh7,<br>Vero E6 | WT,<br>Alpha,<br>Beta,<br>Delta                              | Preclinical | [227] |
|                     | Fluoxazolevir                | Small               |                         | MA104:<br>3.86 $\mu$ M<br>293ACE2:<br>6.62 $\mu$ M<br>Huh7:<br>2.64 $\mu$ M<br>Vero E6:<br>3.96 $\pm$ 1.0 $\mu$ M (WT),<br>2.63 $\pm$ 0.85 $\mu$ M (Alpha),<br>2.29 $\pm$ 0.79 $\mu$ M (Beta),<br>3.02 $\pm$ 0.96 $\mu$ M (Delta) | >100 $\mu$ M<br>>100 $\mu$ M<br>32.64 $\mu$ M | MA104,<br>293ACE2,<br>Huh7,<br>Vero E6 | WT,<br>Alpha,<br>Beta,<br>Delta                              | Preclinical | [227] |
|                     | (-)-hopeaphenol              | Small               | 0.11 $\mu$ M            | 13.5 $\mu$ M<br>11.4 $\mu$ M<br>8.8 $\mu$ M                                                                                                                                                                                       | >100 $\mu$ M                                  | Vero-E6                                | WA1/2020,<br>B.1.1.7,<br>B.1.351                             | Preclinical | [228] |
|                     |                              |                     |                         |                                                                                                                                                                                                                                   |                                               |                                        |                                                              |             |       |
|                     |                              |                     |                         |                                                                                                                                                                                                                                   |                                               |                                        |                                                              |             |       |
| <b>Nucleocapsid</b> | nCoV396                      | Monoclonal antibody | K <sub>D</sub> =1.02 nM | 0.0032 $\mu$ g/mL                                                                                                                                                                                                                 |                                               | 293 cells                              |                                                              | Preclinical | [229] |
|                     | (-)-gallic acid              | Polyphe-<br>nol     | 44.4 $\mu$ M            | -                                                                                                                                                                                                                                 | -                                             | A549-hACE2                             | SARS-CoV-2<br>nCoV-SH01<br>strain                            | Preclinical | [230] |
|                     | CVL218 (mefuparib)           | Small               |                         | 5.194 $\mu$ M                                                                                                                                                                                                                     | 90.64 $\mu$ M                                 | Vero E6                                | BetaCoV/JS03<br>/human/2020                                  | Preclinical | [231] |
|                     | PJ-34                        | Small               |                         |                                                                                                                                                                                                                                   |                                               |                                        |                                                              | Preclinical | [231] |
|                     | Compound12                   | Small               |                         | 3.69 $\pm$ 0.23 $\mu$ M                                                                                                                                                                                                           | > 200 $\mu$ M                                 | Vero E6                                | SARS-CoV-2<br>strain 107                                     | Preclinical | [232] |
|                     | Compound16                   | Small               |                         | 2.18 $\pm$ 0.43 $\mu$ M                                                                                                                                                                                                           | > 200 $\mu$ M                                 | Vero E6                                | SARS-CoV-2<br>strain 107                                     | Preclinical | [232] |
|                     | Ceftriaxone sodium           | Small               |                         |                                                                                                                                                                                                                                   |                                               |                                        | Structure<br>analysis                                        | Preclinical | [233] |
|                     |                              |                     |                         |                                                                                                                                                                                                                                   |                                               |                                        |                                                              |             |       |
| <b>ORF6</b>         | Selinexor                    | Small               |                         |                                                                                                                                                                                                                                   |                                               |                                        | Selinexor<br>reduced<br>ORF6-induced<br>cellular<br>toxicity | Preclinical | [234] |
|                     |                              |                     |                         |                                                                                                                                                                                                                                   |                                               |                                        |                                                              |             |       |

|                  |                                                      |                      |                                                    |          |                                                     |                    |                                                                            |             |       |
|------------------|------------------------------------------------------|----------------------|----------------------------------------------------|----------|-----------------------------------------------------|--------------------|----------------------------------------------------------------------------|-------------|-------|
| <b>Viral RNA</b> | Azacitidine (5-azacytidine)                          | Small                | 6.99 $\mu\text{mol/L}$ ,<br>2.63 $\mu\text{mol/L}$ |          | 142.7 $\mu\text{mol/L}$ ,<br>25.4 $\mu\text{mol/L}$ | Vero E6,<br>Calu-3 | Wuhan/WIV04/2019                                                           | Preclinical | [235] |
|                  | 5'-ASO#26                                            | Small                |                                                    |          |                                                     |                    | WA1,<br>B.1.351,<br>B.1.427,<br>B.1.1.529                                  | Preclinical | [236] |
|                  | XNAzyme                                              | Enzyme               |                                                    |          |                                                     | HEK293T            |                                                                            | Preclinical | [237] |
|                  | C6G25S                                               | siRNA                | 0.46 nM<br>0.50 nM<br>0.091 nM<br>0.73 nM          |          |                                                     | Vero E6            | B.1.1.7,<br>P.1,<br>B.1.617.2,<br>B.1.429                                  |             | [238] |
|                  | DMA-155                                              | RNA binding scaffold | 16 $\mu\text{M}$                                   |          | 90 $\mu\text{M}$                                    | Vero E6            |                                                                            |             | [239] |
|                  | Cas13d                                               | RNA ribonuclease     |                                                    |          |                                                     | Vero E6            | D614G,<br>Alpha,<br>Zeta,<br>Epsilon<br>(B.1.427),<br>Epsilon<br>(B.1.429) |             | [240] |
|                  | AS_1-75                                              | circRNA              |                                                    | 20-50 nM |                                                     | Vero E6            |                                                                            | Preclinical | [241] |
|                  | ASO4 (locked nucleic acid antisense oligonucleotide) | Oligonucleotide      |                                                    |          |                                                     | Hela,<br>Vero E6   | USA-WA1/2020                                                               | Preclinical | [242] |
|                  | O3                                                   | siRNA                | 1.52 nM                                            |          |                                                     | Vero E6            | hCoV-19/Germany/B<br>AV-Lvirotnum-nacq/2020                                | Preclinical | [243] |
|                  | RBM24                                                | RNA binding protein  |                                                    |          |                                                     | H1299-ACE2 cells   |                                                                            | Preclinical | [244] |

**Table S2: Summary of anti-spike antibodies against SARS-CoV-2**

| Antibody name                        | Resource                       | Target | Format                                   | Fc         | IC <sub>50</sub>                                                                                                          | EC <sub>50</sub> | SARS-CoV-2 strain                      | Cell line                | PDB          | Status                                          | Ref.       |
|--------------------------------------|--------------------------------|--------|------------------------------------------|------------|---------------------------------------------------------------------------------------------------------------------------|------------------|----------------------------------------|--------------------------|--------------|-------------------------------------------------|------------|
| Bebtelovimab (LY-CoV1404, LY3853113) | Convalescent COVID-19 patients | RBD    | Human IgG1 $\lambda$ monoclonal antibody | WT         | 9.034 ng/mL                                                                                                               |                  | SARS-CoV-2/MT020880.1                  | Vero E6                  | 7MMO         | Phase 2 (NCT04634409)                           | [245]      |
| Imdevimab (REGN10987)                | COVID-19 patient               | RBD    | Human IgG1 $\lambda$ monoclonal antibody | WT         | 42.1 pM                                                                                                                   |                  | USA-WA1 / 2020                         | Vero E6                  | 6XDG         | Phase 4 (NCT05502081)                           | [246]      |
| Casirivimab (REGN10933)              | Humanized mice                 | RBM    | Human IgG1 $\kappa$ monoclonal antibody  | WT         | 37.4 pM                                                                                                                   |                  | USA-WA1 / 2020                         | Vero E6                  | 6XDG         | Phase 4 (NCT04748588)                           | [246]      |
| Romlusevimab (BR11-198)              | COVID-19 patients              |        | Human IgG1 $\lambda$ monoclonal antibody | YTE        |                                                                                                                           |                  |                                        |                          |              | Phase 3 (NCT04501978)                           | [247]      |
| Amubarvimab (BR11-196, P2C-1F11)     | COVID-19 patients              | RBD    | Human IgG1 $\kappa$ monoclonal antibody  | YTE        | 0.03 $\mu$ g/mL                                                                                                           |                  | Beta / Shenzhen / SZTH-003 / 2020      | Vero E6                  | 7E8M         | Phase 3 (NCT04501978)                           | [248, 249] |
|                                      | Convalescent COVID-19 patients | RBD    | Human IgG1 monoclonal antibody           |            | WT D614:0.020 $\mu$ g/mL<br>WT D614G:0.016 $\mu$ g/mL                                                                     |                  | WT, beta, delta                        | Vero E6                  | 7CDI         |                                                 | [250]      |
| Bamlanivimab (LY-CoV555)             | COVID-19 patient               | RBD    | Human IgG1 $\kappa$ monoclonal antibody  | WT         | 0.012 to 0.103 $\mu$ g/mL                                                                                                 |                  | USA-WA1 /2020<br>Italy-INM11           | Vero E6                  | 7KMG<br>7L3N | Phase 4 (NCT04656691, NCT04796402, NCT04748588) | [251]      |
| Etesevimab (CB6, JS016, LY-CoV016)   | COVID-19 patient               | RBM    | Human IgG1 $\kappa$ monoclonal antibody  | LALA       | 0.32 nM                                                                                                                   |                  |                                        |                          | 7C01         | Phase 3 (NCT05205759, NCT04790786, NCT04497987) | [252, 253] |
| Sotrovimab (VIR-7831, GSK4182136)    | SARS-CoV-1 survivor            | RBD    | Human IgG1 $\kappa$ monoclonal antibody  | LS         | 100.1 ng/mL                                                                                                               |                  | USA-WA1 / 2020                         | Vero E6                  |              | Phase 4 (NCT04748588)                           | [254]      |
| S309                                 | SARS-CoV-1 survivor            | RBD    | Human IgG1 monoclonal antibody           | LS         | 79 ng/mL                                                                                                                  |                  | USA-WA1 / 2020                         | Vero E6                  | 6WPT         | Preclinical                                     | [255]      |
|                                      |                                |        |                                          |            | 0.13 $\mu$ g/mL,<br>0.094 $\mu$ g/mL,<br>0.138 $\mu$ g/mL,<br>0.638 $\mu$ g/mL,<br>0.228 $\mu$ g/mL,<br>1.041 $\mu$ g/mL, |                  | Victoria BA.1, BA.1.1 BA.2 BA.3 BA.4/5 | HEK293T /17              | 7YQY         | Preclinical                                     | [256]      |
| VIR-7832 (GSK4182137)                | SARS-CoV-1 survivor            | RBD    | Human IgG1 $\kappa$ monoclonal antibody  | LS/GA ALIE | 78.3 ng/mL                                                                                                                |                  | USA-WA1 / 2020                         | Vero E6                  |              | Phase 1/2 (NCT04746183)                         | [254]      |
| Cilgavimab (AZD1061)                 | COVID-19 patients              | RBD    | Human IgG1 $\kappa$ monoclonal antibody  | TM/YTE     | 0.53 nM                                                                                                                   |                  | USA-WA1 / 2020                         | HEK293T-human ACE2 cells | 7L7E         | Phase 3 (NCT04625972, NCT04625725, NCT0472)     | [257]      |

|                       |                                |     |                                          |        |                                                                 |                  |                                                                     |                          |      |                                                 |            |
|-----------------------|--------------------------------|-----|------------------------------------------|--------|-----------------------------------------------------------------|------------------|---------------------------------------------------------------------|--------------------------|------|-------------------------------------------------|------------|
|                       |                                |     |                                          |        |                                                                 |                  |                                                                     |                          |      | 3394)                                           |            |
| Tixagevimab (AZD8895) | COVID-19 patients              | RBD | Human IgG1 $\kappa$ monoclonal antibody  | TM/YTE | 0.32 nM                                                         |                  | USA-WA1 / 2020                                                      | HEK293T-human ACE2 cells | 7L7E | Phase 3 (NCT04625972, NCT04625725, NCT04723394) | [257]      |
| Regdanvimab (CT-P59)  | COVID-19 patient               | RBM | Human IgG1 $\lambda$ rAb                 | WT     | 8.4 ng/mL, 5.7 ng/mL                                            |                  | wide-type: hCoV-19/Korea/KUMC17/2020, D614G: SARS-CoV-2 (B.1.617.2) | Vero E6                  | 7CM4 | Phase 3 (NCT05271929)                           | [258]      |
| Adintrevimab (ADG20)  | Convalescent COVID-19 patients | RBD | Human IgG1 monoclonal antibody           | LALA   | 19.6 ng/mL<br>403 ng/mL                                         |                  | Delta: SARS-CoV-2 (B.1.617.2)<br>Omicron: SARS-CoV-2 (B.1.1.529)    | Vero cells               | 7U2D | Phase 2/3(NCT04859517, NCT04805671)             | [259]      |
|                       |                                |     |                                          |        | 9ng/mL<br>15ng/mL<br>13ng/mL<br>14ng/mL<br>15ng/mL<br>1203ng/mL |                  | Alpha<br>Beta<br>Gamma<br>Delta<br>Mu<br>Omicron                    | HEK293T                  |      | Phase 2/3 (NCT04859517, NCT04805671)            | [260]      |
| P2B-2F6               | COVID-19 patients              | RBD | Human IgG1 monoclonal antibody           |        | 0.41 $\mu$ g/mL                                                 |                  | Beta / Shenzhen / SZTH-003 / 2020                                   | Vero E6                  | 8DCC | Phase 3 (NCT04501978)                           | [248, 249] |
| MAD0004J08            | convalescent COVID-19 patient  | RBD | Human IgG1 monoclonal antibody           |        |                                                                 | 4.8 to 5.8 ng/mL | MT066156, MT527178                                                  | Vero E6                  |      | Phase 2/3 (NCT04952805)                         | [261]      |
| DZIF-10c              | Convalescent COVID-19 patients | RBM | Human IgG1 monoclonal antibody           |        | 0.007 $\mu$ g/mL                                                | 0.046 $\mu$ g/mL | D614G                                                               | Vero E6                  | 6XDG | Phase 1/2 (NCT04631666, NCT04631705)            | [262]      |
| COV44-62              | Convalescent COVID-19 patients | RBD | Human IgG1 $\lambda$ monoclonal antibody |        |                                                                 |                  | Wuhan Hu-1                                                          | Vero E6                  | 8D36 | Preclinical                                     | [263]      |
| COV44-79              | Convalescent COVID-19 patients | RBD | Human IgG1 $\kappa$ monoclonal antibody  |        |                                                                 |                  | Wuhan Hu-1                                                          | Vero E6                  | 8DAO | Preclinical                                     | [263]      |
| 1212C2                | Convalescent COVID-19 patient  | RBD | Human IgG1 monoclonal antibody           | LALA   |                                                                 |                  | USA-WA1 / 2020                                                      | Vero E6                  |      | Preclinical                                     | [264]      |
| B38                   | Convalescent COVID-19 patients | RBD | Human IgG1 monoclonal antibody           |        | 0.177 $\mu$ g/mL                                                |                  | BetaCoV/Shenzhen/SZTH-003/2020                                      | Vero E6                  | 7bZ5 | Preclinical                                     | [265]      |
| H4                    | Convalescent COVID-19 patients | RBD | Human IgG1 monoclonal antibody           |        | 0.896 $\mu$ g/mL                                                |                  | BetaCoV/Shenzhen/SZTH-003/2020                                      | HEK293T-human ACE2 cells | 7UNK | Preclinical                                     | [265]      |
| BD-368-2              | Convalescent COVID-19 patients | RBD | Human IgG1 monoclonal antibody           |        | 15 ng/mL                                                        |                  | 2019-nCoV BetaCoV/Wuhan/AMMS01/2020                                 | Vero E6                  | 7CHH | Preclinical                                     | [266]      |

|          |                                                        |         |                                |      |                                             |                                           |                                                                                            |         |      |             |            |
|----------|--------------------------------------------------------|---------|--------------------------------|------|---------------------------------------------|-------------------------------------------|--------------------------------------------------------------------------------------------|---------|------|-------------|------------|
| BD23     | Convalescent COVID-19 patients                         | RBD     | Human IgG1 monoclonal antibody |      |                                             |                                           | 2019-nCoV BetaCoV/Wuhan/AMMS01/2020                                                        | Vero E6 | 7BYR | Preclinical | [266]      |
| H014     | Mice immunized with recombinant SARS-CoV RBD           | RBD     | Human IgG1 monoclonal antibody |      | 38 nM                                       |                                           | BetaCoV/Beijing/AMMS01/2020                                                                | Vero    | 7CAH | Preclinical | [267, 268] |
| P17      | Mice immunized with recombinant SARS-CoV RBD           | RBM     | Human IgG1 monoclonal antibody |      | 0.195 nM                                    | 29 pM                                     |                                                                                            | Vero E6 | 7CWM | Preclinical | [267]      |
| S2H97    | COVID-19 patients                                      | RBD     | Human IgG1 monoclonal antibody | LS   | 749 ng/mL                                   |                                           | USA-WA1 / 2020                                                                             | Vero E6 |      | Preclinical | [269]      |
| S2K146   | Convalescent COVID-19 patients                         | RBM     | Human IgG1 monoclonal antibody | LS   | 10 ng/mL<br>9 ng/mL,<br>9 ng/mL,<br>8 ng/mL |                                           | USA-WA1 / 2020 Alpha, Beta, Delta                                                          | Vero E6 | 7TAT | Preclinical | [270]      |
| S5D2     | Mice immunized with the recombinant trimeric S protein | RBD     | Human IgG1 monoclonal antibody |      | Live virus: 0.056 µg/mL                     |                                           | CoV-SH01                                                                                   | Vero E6 | 7WD7 | Preclinical | [271]      |
| S5G2     | Mice immunized with the recombinant trimeric S protein | RBD     | Human IgG1 monoclonal antibody |      | Live virus: 0.205 µg/mL                     |                                           | nCoV-SH01                                                                                  | Vero E6 | 7WCZ | Preclinical | [271]      |
| S3H3     | Mice immunized with the recombinant trimeric S protein | non-RBD | Human IgG1 monoclonal antibody |      | Live virus: 0.457 µg/mL                     |                                           | nCoV-SH01                                                                                  | Vero E6 | 7WK8 | Preclinical | [271]      |
| STI-9167 | Harbour H2L2® mice                                     | RBD     | Human IgG1 monoclonal antibody | LALA | 6.041 ng/mL<br>13.7 ng/mL<br>54.29ng/mL     | 0.025 µg/mL<br>0.011 µg/mL<br>0.024 µg/mL | USA-WA1 / 2020<br><br>Delta: SARS-CoV-2 (B.1.617.2)<br><br>Omicron: SARS-CoV-2 (B.1.1.529) | Vero E6 |      | Preclinical | [272]      |
| Clone2   | Mice immunized with purified SARS-CoV-2 RBD            | RBD     | Human IgG1 monoclonal antibody |      | 108.3 ng/mL                                 |                                           | USA-WA1 / 2020                                                                             | Vero E6 |      | Preclinical | [273]      |
| Clone6   | Mice immunized with purified SARS-CoV-2                | RBD     | Human IgG1 monoclonal antibody |      | 35.73 ng/mL                                 |                                           | USA-WA1 / 2020                                                                             | Vero E6 |      | Preclinical | [273]      |

|           |                                |      |                                |  |                                                                                          |                      |                                                                                  |                                 |                      |                          |       |
|-----------|--------------------------------|------|--------------------------------|--|------------------------------------------------------------------------------------------|----------------------|----------------------------------------------------------------------------------|---------------------------------|----------------------|--------------------------|-------|
|           | RBD                            |      |                                |  |                                                                                          |                      |                                                                                  |                                 |                      |                          |       |
| 35B5      | Convalescent COVID-19 patients | RBD  | Human IgG1 monoclonal antibody |  | 1.55 ng/mL (WT)<br>7.29 ng/mL (D614G)<br>13.04 ng/mL (B.1.351)<br>5.63 ng/mL (B.1.617.2) | 0.0183 µg/mL (RBD)   | WT (EPI_ISL403934)<br>D614G,<br>B.1.351,<br>B.1.617.2                            | Vero E6                         | 7WLZ                 | Preclinical              | [274] |
| 87G7      | Mice                           | RBD  | Human IgG1 monoclonal antibody |  | 5.4 ng/mL,<br>5.7 ng/mL,<br>3.7 ng/mL,<br>4.2 ng/mL,<br>6.7 ng/mL,<br>10.2 ng/mL         |                      | Wuhan-Hu-1;<br>D614G;<br>Alpha;<br>Delta;<br>Omicron BA.1;<br>Omicron BA.2       | Calu-3                          | 7R40                 | Preclinical              | [275] |
| J08       | Convalescent COVID-19 patient  | RBD  | Human IgG1 monoclonal antibody |  | 22 ng/mL,<br>77 ng/mL,<br>499 ng/mL,<br>147 ng/mL,<br>226 ng/mL                          |                      | D614G;<br>Alpha;<br>Beta;<br>Gamma<br>Delta                                      | HEK293T<br>N-hACE2              | 7SBU                 | Preclinical              | [276] |
| G9        | Convalescent COVID-19 patient  | RBD  | Human IgG1 monoclonal antibody |  | 23.9 to 405 ng/mL                                                                        |                      | WT,<br>B.1.1.7,<br>B.1.351,<br>B.1.617.2,<br>B.1.525                             | Huh-7                           |                      | Preclinical              | [277] |
| NT-193    | humanized mice                 | RBD  | Human IgG1 monoclonal antibody |  | < 100 ng/mL                                                                              |                      |                                                                                  | VeroE6/T<br>MPRSS2              | 7E5O                 | Preclinical              | [278] |
| 76E1      | Convalescent COVID-19 patients | RBD  | Human IgG1 monoclonal antibody |  | Vero-E6: 0.373 µg/mL<br>HeLa-hACE2 :0.727µg/mL<br>Calu-3:0.433 µg/mL                     | Vero-E6: 0.072 µg/mL | B.1.1.7、P.1、<br>B.1.351、<br>B.1.617.1、<br>A.1.616.2<br>B.1.1.529<br>Omicron BA.1 | Vero-E6<br>HeLa-hACE2<br>Calu-3 | 7X9E                 | Preclinical              | [279] |
| N-612-017 | Convalescent COVID-19 patients | RBD  | Human IgG1 monoclonal antibody |  | 0.09–0.25 µg/mL                                                                          |                      | wild-type (D614G),<br>B.1.1.7                                                    | Vero E6                         | 7S0C                 | Preclinical              | [280] |
| CV07-287  | Convalescent COVID-19          | RBD  | Human IgG1 monoclonal antibody |  | < 200 ng/mL                                                                              |                      | Wildtype<br>Munich isolate<br>984, Beta, Delta                                   | Vero E6                         | 7S5P<br>7S5Q<br>7S5R | Preclinical              | [281] |
| IMM20184  | Convalescent COVID-19 patients | RBD  | Human IgG1 monoclonal antibody |  | BavPat(D614G)33.8 nM<br>Alpha 43.3 nM<br>Beta 81 nM<br>Gamma 18.4 nM                     |                      | WA1/2020<br>D614G,<br>BA.1, BA.1.1.                                              | VeroE6                          |                      | Preclinical              | [282] |
| IMM20190  | Convalescent COVID-19 patients | RBD  | Human IgG1 monoclonal antibody |  | BavPat(D614G)0.4 nM<br>Alpha 2.7 nM<br>Beta >393 nM<br>Gamma>393 nM                      |                      | WA1/2020<br>D614G,<br>BA.1, BA.1.1.                                              | VeroE6                          |                      | Preclinical              | [282] |
| IMM20253  | Convalescent COVID-19 patients | RBD  | Human IgG1 monoclonal antibody |  | BavPat(D614G)39.4 nM<br>Alpha 1.4 nM<br>Beta 155.4 nM<br>Gamma 13.4 nM                   |                      | WA1/2020<br>D614G,<br>BA.1, BA.1.1.                                              | VeroE6                          |                      | Preclinical              | [282] |
| DXP-604   | Convalescent COVID-19 patients | RBD  | Human IgG monoclonal antibody  |  | 0.287 µg/mL                                                                              |                      | Omicron:<br>SARS-CoV-2<br>(B.1.1.529)                                            | HEK293F                         |                      | Phase 2<br>(NCT05381519) | [283] |
| ADG-2     | SARS-CoV-1 survivor            | RBM  | Human IgG monoclonal antibody  |  | ~ 1 ng/mL                                                                                |                      | USA-WA1 /<br>2020                                                                | HeLa-hACE2                      |                      | Preclinical              | [284] |
| 2-43      | COVID-19                       | Non- | Human                          |  | 0.003 µg/mL                                                                              |                      | USA-WA1 /                                                                        | Vero E6                         | 7L56                 | Preclinical              | [285] |

|                      |                                     |                  |                                |    |                               |            |                                          |         |                      |                         |       |
|----------------------|-------------------------------------|------------------|--------------------------------|----|-------------------------------|------------|------------------------------------------|---------|----------------------|-------------------------|-------|
|                      | patients                            | RBD, non-NTD     | IgG monoclonal antibody        |    |                               |            | 2020                                     |         |                      | al                      |       |
| 2-51                 | COVID-19 patients                   | Non-RBD, non-NTD | Human IgG monoclonal antibody  |    | 0.007 µg/mL                   |            | USA-WA1 / 2020                           | Vero E6 | 7L2C                 | Preclinical             | [285] |
| Ab2-4                | COVID-19 patients                   | Non-RBD, non-NTD | Human IgG monoclonal antibody  |    | 0.394 µg /mL                  |            | USA-WA1 / 2020                           | Vero E6 | 6XEY                 | Preclinical             | [285] |
| A23-58.1             | COVID-19 patients                   | RBD              | Human IgG monoclonal antibody  |    | 2.1 ng/mL                     | 81 ng/mL   | USA-WA1 / 2020                           | Vero E6 | 7LRT<br>7LRS         | Preclinical             | [286] |
| B1-182.1             | COVID-19 patients                   | RBD              | Human IgG monoclonal antibody  |    | 2.4 ng/mL                     | 122 ng/mL  | USA-WA1 / 2020                           | Vero E6 | 7MLZ<br>7MM0         | Preclinical             | [286] |
| 4A8                  | Convalescent COVID-19 patients      | Non-RBD          | Human IgG monoclonal antibody  |    | 0.39 µg/mL                    | 0.61 µg/mL |                                          | Vero E6 | 7C2L                 | Preclinical             | [287] |
| ADI-55689            | SARS-CoV-1 survivor                 | RBD              | Human IgG monoclonal antibody  |    |                               |            | SARS-CoV-2/MT020880.1                    | Vero E6 |                      | Preclinical             | [288] |
| ADI-56046            | SARS-CoV-1 survivor                 | RBD              | Human IgG monoclonal antibody  |    |                               |            | SARS-CoV-2/MT020880.1                    | Vero E6 |                      | Preclinical             | [288] |
| C121                 | COVID-19 patients                   | RBM              | Human IgG monoclonal antibody  |    | 1.64 ng/mL                    |            | USA-WA1 / 2020                           | Vero E6 | 7K8Y                 | Preclinical             | [289] |
| C144-LS (BMS-986413) | COVID-19 patients                   | RBD              | Human IgG monoclonal antibody  |    | 2.55 ng/mL                    |            | USA-WA1 / 2020                           | Vero E6 |                      | Phase 2/3 (NCT04518410) | [289] |
| C135-LS (BMS-986414) | COVID-19 patients                   | RBD              | Human IgG monoclonal antibody  |    | 2.98 ng/mL                    |            | USA-WA1 / 2020                           | Vero E6 |                      | Phase 2/3 (NCT04518410) | [289] |
| COVA1-16             | Convalescent COVID-19 patients      | RBD              | Human IgG1 monoclonal antibody | WT | 0.02 µg/mL                    |            | German isolate; GISAID ID EPI-ISL 406862 | Vero E6 | 7JMW                 | Preclinical             | [290] |
| COVA1-18             | Convalescent COVID-19 patients      | RBD              | Human IgG monoclonal antibody  |    | 0.007 µg/mL                   |            | German isolate; GISAID ID EPI-ISL 406862 | Vero E6 |                      | Preclinical             | [291] |
| COVA2-15             | Convalescent COVID-19 patients      | RBD              | Human IgG monoclonal antibody  |    | 0.009 µg/mL                   |            | German isolate; GISAID ID EPI-ISL 406862 | Vero E6 |                      | Preclinical             | [291] |
| COVA2-04             | a convalescent donor from Amsterdam | RBD              | Human IgG monoclonal antibody  |    | 2.5 µg/mL                     |            | GenBank:QHD43416.1                       |         | 7JMO                 | Preclinical             | [292] |
| COVA2-39             | a convalescent donor from Amsterdam | RBD              | Human IgG monoclonal antibody  |    | 0.054 µg/mL                   |            | GenBank:QHD43416.1                       |         | 7JMP                 | Preclinical             | [292] |
| EY6A                 | Convalescent COVID-19 patient       | RBD              | Human IgG monoclonal antibody  |    | ND <sub>50</sub> : 0.39 µg/mL |            | Australia/VIC01/2020(PRNT)(PHE, Porton   | Vero E6 | 6ZER<br>6ZDG<br>6ZDH | Preclinical             | [293] |

|          |                                    |       |                               |  |                                                                                 |  |                                                                   |                                            |              |             |       |
|----------|------------------------------------|-------|-------------------------------|--|---------------------------------------------------------------------------------|--|-------------------------------------------------------------------|--------------------------------------------|--------------|-------------|-------|
|          |                                    |       |                               |  |                                                                                 |  | Down)                                                             |                                            |              |             |       |
| S2H13    | COVID-19 patients                  | RBM   | Human IgG monoclonal antibody |  | PSV: 500 ng/mL                                                                  |  | Wu-hu-1                                                           | Vero E6                                    | 7JV4<br>7VJ2 | Preclinical | [294] |
| S2H14    | COVID-19 patients                  | RBM   | Human IgG monoclonal antibody |  | PSV: 900 ng/mL                                                                  |  | Wu-hu-1                                                           | Vero E6                                    | 7JXC         | Preclinical | [294] |
| S2A4     | COVID-19 patients                  | RBM   | Human IgG monoclonal antibody |  | PSV: 3.5 µg/mL                                                                  |  | Wu-hu-1                                                           | Vero E6                                    | 7JVA         | Preclinical | [294] |
| S304     | COVID-19 patients                  | RBM   | Human IgG monoclonal antibody |  | PSV: 500 ng/mL                                                                  |  | Wu-hu-1                                                           | Vero E6                                    | 7JW0         | Preclinical | [294] |
| R40-1G8  | Convalescent COVID-19 individuals  | RBD   | Human IgG monoclonal antibody |  | < 0.02 µg/mL                                                                    |  | SARS-2-S Wu01,<br>SARS-2-S SARS-1,SARS-2-S WiV-1,<br>SARS-2-S B.1 | HEK293T cells                              | 7SC1         | Preclinical | [295] |
| JMB2002  | Convalescent COVID-19 patients     | RBD   | Human IgG monoclonal antibody |  | 1.8 nM                                                                          |  | Omicron: SARS-CoV-2 (B.1.1.529)                                   |                                            |              | Preclinical | [296] |
| CC40.8   | Convalescent COVID-19 patients     | RBD   | Human IgG monoclonal antibody |  | CC40.8-treated animals exhibited less weight loss and reduced lung viral titers |  | SARS-CoV-2 (WT-Wuhan)                                             | HEK293T                                    | 7SJS         | Preclinical | [297] |
| 1-57     | Convalescent COVID-19 patients     | RBD   | Human IgG monoclonal antibody |  | 0.008 µg/mL                                                                     |  | USA-WA1 / 2020                                                    | Vero E6                                    | 7LS9         | Preclinical | [298] |
| 2-7      | Convalescent COVID-19 patients     | RBD   | Human IgG monoclonal antibody |  | 0.003 µg/mL                                                                     |  | USA-WA1 / 2020                                                    | Vero E6                                    | 7LSS         | Preclinical | [298] |
| DH1047   | Convalescent patient with SARS-CoV | RBD   | Human IgG monoclonal antibody |  | 0.397 µg/mL<br>0.059 µg/mL                                                      |  | Q498Y/P499T, D614G                                                | Vero E6                                    | 7SG4<br>7LD1 | Preclinical | [299] |
| hMab5.17 | Mice                               | RBD   | Human IgG monoclonal antibody |  | 12.2 µg/mL                                                                      |  | hCoV-19/Taiwan/4/2020 and variants                                | Vero                                       |              | Preclinical | [300] |
| 1Ba-3H   | Mouse                              | RBM   | Human IgG monoclonal antibody |  | PSV: 16.8µg/ mL                                                                 |  |                                                                   | ACE2-293T                                  |              | Preclinical | [301] |
| 2-36     | Convalescent COVID-19 patients     | RBD   | Human IgG monoclonal antibody |  | 0.029 µg/mL                                                                     |  | USA-WA1 / 2020                                                    | Vero E6                                    | 7N5H         | Preclinical | [302] |
| G32R7    | Convalescent COVID-19 patients     | RBD-1 | Human IgG monoclonal antibody |  | 0.109 µg/mL,<br>0.08 µg/mL,<br>0.375 µg/mL,<br>1.851 µg/mL,<br>0.162 µg/mL      |  | Wuhan-Hu-1, Alpha, Gamma, Delta, Omicron BA.1                     | 293FT co-expressing human ACE2 and TMPRSS2 | 7N64         | Preclinical | [303] |
| G32Q4    | Convalescent COVID-19 patients     | RBD-3 | Human IgG monoclonal antibody |  | 0.578 µg/mL,<br>1.476 µg/mL,<br>0.089 µg/mL,<br>0.316 µg/mL,<br>6.666 µg/mL     |  | Wuhan-Hu-1, Alpha, Gamma, Delta, Omicron BA.1                     | 293FT co-expressing human ACE2 and TMPRSS2 | 7SWP         | Preclinical | [303] |
| C549     | Convalescent COVID-19 patients     | RBD   | Human IgG monoclonal antibody |  | 15 ng/mL                                                                        |  | SARS-CoV-2 pseudotyped HIV-1                                      | HT1080/A CE2.cl14 cells                    |              | Preclinical | [304] |
| C099     | Convalescent COVID-19 patients     | RBD   | Human IgG monoclonal antibody |  | 15 - 48 ng/mL,<br>L455R (123 ng/mL)                                             |  | SARS-CoV-2 pseudotyped HIV-1                                      | HT1080/A CE2.cl14 cells                    | 7N3H         | Preclinical | [304] |
| C080     | Convalescent COVID-                | RBD   | Human IgG monoclonal          |  | 71 ng/mL                                                                        |  | SARS-CoV-2 pseudotyped                                            | HT1080/A                                   | 7N3F         | Preclinical | [304] |



|           |                                             |              |                                            |  |                                                                                                                                                                                                                                                                     |                                      |                                                                 |                |                                                            |             |       |
|-----------|---------------------------------------------|--------------|--------------------------------------------|--|---------------------------------------------------------------------------------------------------------------------------------------------------------------------------------------------------------------------------------------------------------------------|--------------------------------------|-----------------------------------------------------------------|----------------|------------------------------------------------------------|-------------|-------|
|           | 19 patients                                 |              | antibody                                   |  |                                                                                                                                                                                                                                                                     |                                      | HIV-1                                                           | CE2.cl14 cells |                                                            |             |       |
| mAb222    | Convalescent COVID-19 patients              | RBD          | Human IgG monoclonal antibody              |  | 0.019 $\mu$ g/mL,<br>0.018 $\pm$ 0.001 $\mu$ g/mL                                                                                                                                                                                                                   |                                      | Victoria, B.1.617.2                                             | Vero           | 7NX6,<br>7NX7,<br>7NX8,<br>7NX9,<br>7NXB,<br>7NXA,<br>7NXC | Preclinical | [305] |
| mAb298    | Mice                                        | RBD          | Human IgG monoclonal antibody              |  | 57 ng/mL                                                                                                                                                                                                                                                            |                                      | D614GB.1.351                                                    | 293T-ACE2      |                                                            | Preclinical | [306] |
| S-E6      | Healthy donors before the COVID-19 pandemic | RBD          | Human IgG monoclonal antibody              |  | 12.2 $\pm$ 0.7 nm                                                                                                                                                                                                                                                   |                                      | B.1.351 and P.1                                                 | Vero           | 7KN4                                                       | Preclinical | [307] |
| P5A-3C8   | Convalescent COVID-19 patients              | RBD          | Human IgG monoclonal antibody              |  | 0.0112 $\mu$ g/mL                                                                                                                                                                                                                                                   |                                      | Beta/Shenzhen/SZTH-003/2020, EPI_ISL_406594                     | Vero-E6        | 7CHP                                                       | Preclinical | [308] |
| Omi-3     | Convalescent COVID-19 patients              | RBD          | Human IgG monoclonal antibody              |  | 0.007 $\pm$ 0.000 $\mu$ g/mL,<br>0.012 $\pm$ 0.007 $\mu$ g/mL,<br>0.009 $\pm$ 0.001 $\mu$ g/mL,<br>0.004 $\pm$ 0.000 $\mu$ g/mL,<br>0.004 $\pm$ 0.000 $\mu$ g/mL,<br>0.009 $\pm$ 0.002 $\mu$ g/mL,<br>0.015 $\pm$ 0.000 $\mu$ g/mL,<br>0.028 $\pm$ 0.002 $\mu$ g/mL |                                      | Victoria Alpha, Beta, Gamma, Delta, BA.1 BA.1.1 BA.2            | Vero cells     |                                                            | Preclinical | [309] |
| C1C-A3    | Convalescent COVID-19                       | RBD          | Human IgG monoclonal antibody              |  | 0.141 $\mu$ g/mL,<br>0.139 $\mu$ g/mL,<br>0.185 $\mu$ g/mL,<br>1.4 $\mu$ g/mL,<br>0.234 $\mu$ g/mL,<br>0.158 $\mu$ g/mL,<br>0.06 $\mu$ g/mL                                                                                                                         | 0.087 $\mu$ g/mL                     | WT (D614G), Alpha, Beta, Epsilon Kappa, Lambda, Gamma           | HEK293T        | 7SN2                                                       | Preclinical | [310] |
| 510A5     | Convalescent COVID-19 patients              | RBD          | Human IgG monoclonal antibody              |  | WT:17.10 ng/mL<br>Delta:22.26 ng/mL                                                                                                                                                                                                                                 | WT:16.78ng/mL<br>Delta:14.14 ng/mL   | Omicron, Delta, and WT                                          | Lenti-X293T    |                                                            | Preclinical | [311] |
| Beta-53   | Convalescent COVID-19 patients              | RBD          | Human IgG monoclonal antibody              |  |                                                                                                                                                                                                                                                                     |                                      | Alpha Beta Gamma                                                | HEK-293T       | 7Q9M                                                       | Preclinical | [312] |
| COV2-2196 | Convalescent COVID-19 patients              | RBD          | Human IgG monoclonal antibody              |  |                                                                                                                                                                                                                                                                     |                                      | OmicronBA.1; OmicronBA.1.1 D614G                                | VeroE6/TMPRSS2 | 8D8R                                                       | Preclinical | [313] |
| COV2-2130 | Convalescent COVID-19 patients              | RBD          | Human IgG monoclonal antibody              |  |                                                                                                                                                                                                                                                                     |                                      | OmicronBA.1; OmicronBA.1.1 D614G                                | VeroE6/TMPRSS2 |                                                            | Preclinical | [313] |
| COV2-3434 | Convalescent COVID-19 patients              | Non-RBD(NTD) | Human trimer-interface monoclonal antibody |  | 32 $\mu$ g/mL,<br>5.5 $\mu$ g/mL                                                                                                                                                                                                                                    | 0.025 $\mu$ g/ML (SARS-CoV-2 S6Pect) | D614G; Wash-B 1.351                                             | Vero           |                                                            | Preclinical | [314] |
| P2G3      | Convalescent COVID-19 patients              | RBD          | Human IgG monoclonal antibody              |  | Omicron BA.1<br>0.021 $\mu$ g /mL<br>BA .2 0.0008 $\mu$ g /mL                                                                                                                                                                                                       |                                      | 2019-nCoV (D614G) strain, Alpha, Beta, Gamma, Delta and Omicron | Vero E6        | 7QTK                                                       | Preclinical | [315] |
| P5C3      | Convalescent COVID-19 patients              | RBD          | Human IgG monoclonal antibody              |  | Omicron BA.1<br>0.351 $\mu$ g /mL<br>BA .2 0.158 $\mu$ g /mL                                                                                                                                                                                                        |                                      | 2019-nCoV (D614G) strain, Alpha, Beta, Gamma, Delta and Omicron | Vero E6        | 7P40 or 7PHG                                               | Preclinical | [315] |
| VH01H1    | Convalescent COVID-                         | RBD          | Human IgG monoclonal                       |  | IgG:43 $\mu$ g /mL<br>12.5 $\mu$ g /mL                                                                                                                                                                                                                              |                                      | WA-1 (USA-WA1/2020) ,                                           | Vero-TMPRSS2   |                                                            | Preclinical | [316] |

|          |                                |     |                                |  |                                                                                           |  |                                                                                                  |                 |      |             |       |
|----------|--------------------------------|-----|--------------------------------|--|-------------------------------------------------------------------------------------------|--|--------------------------------------------------------------------------------------------------|-----------------|------|-------------|-------|
|          | 19 patients                    |     | antibody                       |  | 19.7µg /mL<br>scFv:7.3µg /mL<br>0.9µg /mL<br>2.6µg /mL                                    |  | BA.1 (hCoV-19/USA/MD-HP20874/2021)<br>BA.2 (hCoV-19/USA/MD-HP24556/2022)                         |                 |      |             |       |
| C77G12   | Convalescent COVID-19 patients | RBD | Human IgG monoclonal antibody  |  | IgG:26.9µg /mL<br>2.9µg /mL<br>5.4µg /mL<br>scFv:2µg /mL<br>0.6µg /mL<br>0.8µg /mL        |  | WA-1 (USA-WA1/2020),<br>BA.1 (hCoV-19/USA/MD-HP20874/2021)<br>BA.2 (hCoV-19/USA/MD-HP24556/2022) | Vero-TMPRSS2    |      | Preclinical | [316] |
| C102     | Convalescent COVID-19 patients | RBD | Human IgG monoclonal antibody  |  | 34ng/mL                                                                                   |  |                                                                                                  | Expi293F        | 7K8M | Preclinical | [317] |
| C104     | Convalescent COVID-19 patients | RBD | Human IgG monoclonal antibody  |  | 23.3ng/mL                                                                                 |  |                                                                                                  | Expi293F        | 7K8U | Preclinical | [317] |
| C119     | Convalescent COVID-19 patients | RBD | Human IgG monoclonal antibody  |  | 9.1ng/mL                                                                                  |  |                                                                                                  | Expi293F        | 7K8W | Preclinical | [317] |
| C144     | Convalescent COVID-19 patients | RBD | Human IgG monoclonal antibody  |  | 6.9ng/mL                                                                                  |  |                                                                                                  | Expi293F        | 7K90 | Preclinical | [317] |
| CV30     | Convalescent COVID-19 patients | RBD | Human IgG monoclonal antibody  |  | 0.118 µg/mL                                                                               |  | USA-WA1/2020                                                                                     | VeroE6          | 6XE1 | Preclinical | [318] |
| CV07-250 | Convalescent COVID-19 patients | RBD | Human IgG monoclonal antibody  |  | 3.5 ng/mL                                                                                 |  | Munich isolate 984                                                                               | HEK293T         | 6XKQ | Preclinical | [319] |
| CV07-270 | Convalescent COVID-19 patients | RBD | Human IgG monoclonal antibody  |  | 82.3 ng/mL                                                                                |  | Munich isolate 984                                                                               | HEK293T         | 6XKP | Preclinical | [319] |
| 5A6      | Convalescent COVID-19 patients | RBD | Human IgG monoclonal antibody  |  | IgG:140.7 ng/mL<br>Fab:3.3ng/m                                                            |  | isolated from a nasopharyngeal swab of an individual in Singapore                                | Vero E6 C1008   | 7M71 | Preclinical | [320] |
| 47D11    | Convalescent COVID-19 patients | RBD | Human IgG monoclonal antibody  |  | WT: 0.063µg /mL<br>E484K: 0.078 µg /mL<br>N501Y: 0.054µg /mL<br>K417N: 0.059 µg /mL       |  | WT,<br>E484K,<br>N501Y,<br>K417N                                                                 | VeroE6          | 7AKJ | Preclinical | [321] |
| BG10-19  | Convalescent COVID-19 patients | RBD | Human IgG monoclonal antibody  |  | 0.002µg /mL<br>0.001µg /mL<br>0.004µg /mL                                                 |  | WT<br>B.1.1.7,<br>B.1.351                                                                        | Vero E6-TMPRSS2 | 7M6E | Preclinical | [322] |
| CC12.1   | Convalescent COVID-19 patients | RBD | Human IgG1 monoclonal antibody |  | 0.019 µg/mL                                                                               |  | USA-WA1/2020                                                                                     | HeLa-ACE2 cells | 6XC2 | Preclinical | [323] |
| CC12.3   | Convalescent COVID-19 patients | RBD | Human IgG monoclonal antibody  |  | 20 ng/mL                                                                                  |  |                                                                                                  |                 | 6XC4 | Preclinical | [324] |
| 553-49   | Convalescent COVID-19 patients | RBD | Human IgG monoclonal antibody  |  | 11.44 ng/mL                                                                               |  | Omicron                                                                                          | 293T            | 7WOG | Preclinical | [325] |
| 58G6     | A COVID-19 patients            | RBD | Human IgG monoclonal antibody  |  | Pseudovirus:<br>4.75 ng/mL<br>1.35 ng/mL<br>183.6 ng/mL<br>Authentic Virus:<br>1.32 ng/mL |  | WT,<br>Delta(B.1.617.2),<br>Omicron BA.1                                                         | Vero E6         | 7E3L | Preclinical | [326] |

|                |                                 |     |                               |  |                                                                                                                                                                                                                         |                                               |                                                                                                                                                                                                                                                                            |                     |      |             |       |
|----------------|---------------------------------|-----|-------------------------------|--|-------------------------------------------------------------------------------------------------------------------------------------------------------------------------------------------------------------------------|-----------------------------------------------|----------------------------------------------------------------------------------------------------------------------------------------------------------------------------------------------------------------------------------------------------------------------------|---------------------|------|-------------|-------|
|                |                                 |     |                               |  | 1.69 ng/mL<br>54.31 ng/mL                                                                                                                                                                                               |                                               |                                                                                                                                                                                                                                                                            |                     |      |             |       |
| F61            | Convalescent COVID-19 patients  | RBD | Human IgG monoclonal antibody |  | HEK293T(Pseudovirus):<br>7 ng/mL<br>11 ng/mL<br>2 ng/mL<br>10 ng/mL<br>9 ng/mL<br>10 ng/mL<br>16 ng/mL<br>19 ng/mL<br>12 ng/mL<br><br>Vero E6(Athueutic virus):<br>10 ng/mL<br>160 ng/mL<br>200 ng/mL<br>130 ng/mL      | 2.638 ng/mL (Delta),<br>4.399 ng/mL (Omicron) | Pseudoviruses:<br>Alpha(B.1.1.7),<br>Beta(B.1.351)<br>Delta(B.1.617.2)<br><br>Delta(B.1.617.3)<br>Omicron(BA.1),<br>Omicron(BA.1.1),<br>Omicron(BA.2),<br>Omicron(BA.3),<br>Omicron(BA.4)<br><br>Athueutic viruses:<br>Omicron(BA.1),<br>Omicron(BA.1.1),<br>Omicron(BA.2) | HEK293T,<br>Vero E6 | 7XST | Preclinical | [327] |
| D2             | Convalescent COVID-19 patients  | RBD | Human IgG monoclonal antibody |  | HEK293T(Pseudovirus):<br>1 ng/mL<br>22 ng/mL<br>8 ng/mL<br>43 ng/mL<br>18 ng/mL<br>249 ng/mL<br>11 ng/mL<br>32 ng/mL<br>318 ng/mL<br><br>Vero E6(Athueutic virus):<br>390 ng/mL<br>350 ng/mL<br>>800 ng/mL<br>162 ng/mL | 3.303 ng/mL (Delta),<br>4.150 ng/mL (Omicron) | Pseudoviruses:<br>Alpha(B.1.1.7),<br>Beta(B.1.351)<br>Delta(B.1.617.2)<br><br>Delta(B.1.617.3)<br>Omicron(BA.1),<br>Omicron(BA.1.1),<br>Omicron(BA.2),<br>Omicron(BA.3),<br>Omicron(BA.4)<br><br>Athueutic viruses:<br>Omicron(BA.1),<br>Omicron(BA.1.1),<br>Omicron(BA.2) | HEK293T,<br>Vero E6 | 7XMZ | Preclinical | [327] |
| CV10-2449–ACE2 | Convalescent COVID-19 patients  | RBD | Human IgG monoclonal antibody |  |                                                                                                                                                                                                                         |                                               | WT,<br>Alpha,<br>Beta,<br>Gamma,<br>Delta,<br>Omicron                                                                                                                                                                                                                      |                     |      | Preclinical | [328] |
| 002-S21F2      | Convalescent COVID-19 patients  | RBD | Human IgG monoclonal antibody |  | 0.05 µg /mL,<br>0.05 µg /mL,<br>0.02 µg /mL,<br>0.03 µg /mL,<br>0.03 µg /mL,<br>0.05 µg /mL,<br>0.04 µg /mL,<br>0.12 µg /mL,<br>0.13 µg /mL,<br>0.13 µg /mL                                                             |                                               | WA.1,<br>Alpha,<br>Beta,<br>Gamma,<br>Delta,<br>BA.1,<br>BA.2,<br>BA.2.12.1,<br>BA.4,<br>BA.5                                                                                                                                                                              | Vero-TMPRSS2        | 7UPL | Preclinical | [329] |
| 5317-10        | Convalescent COVID-19 patients  | RBD | Human IgG monoclonal antibody |  | 0.1311 µg /mL,<br>0.0108 µg /mL,<br>0.1172 µg /mL,<br>0.1857 µg /mL,<br>0.2733 µg /mL,                                                                                                                                  |                                               | WA1,<br>Alpha,<br>Beta,<br>Gamma,<br>Delta                                                                                                                                                                                                                                 | Vero E6             |      | Preclinical | [330] |
| JS026          | A Convalescent COVID-19 patient | RBD | Human IgG monoclonal antibody |  | 3.2 µg /mL,<br>0.6 µg /mL,<br>2.0 µg /mL,<br>3.2 µg /mL,<br>1.4 µg /mL,                                                                                                                                                 |                                               | WT,<br>Alpha,<br>Beta,<br>Gamma,<br>Delta                                                                                                                                                                                                                                  | HEK293T-hACE2       |      | Preclinical | [331] |
| scFv76         | Mice                            | RBD | Human IgG                     |  | Caco-2:                                                                                                                                                                                                                 |                                               | Omicron BA.1,                                                                                                                                                                                                                                                              | Caco-2              | 7ZCF | Preclinical | [332] |

|        |                                |     |                               |  |                                                                                                                                                                                                                                                                                                                                                                                                                                                                                                        |  |                                                                                                                                                                                                                                                                                                                                                                                                                                                                                                                                                                                                                  |                      |                       |             |       |
|--------|--------------------------------|-----|-------------------------------|--|--------------------------------------------------------------------------------------------------------------------------------------------------------------------------------------------------------------------------------------------------------------------------------------------------------------------------------------------------------------------------------------------------------------------------------------------------------------------------------------------------------|--|------------------------------------------------------------------------------------------------------------------------------------------------------------------------------------------------------------------------------------------------------------------------------------------------------------------------------------------------------------------------------------------------------------------------------------------------------------------------------------------------------------------------------------------------------------------------------------------------------------------|----------------------|-----------------------|-------------|-------|
|        |                                |     | monoclonal antibody           |  | 2.84 nM(Omicron BA.1)<br>2.47 nM(Omicron BA.2)<br>Vero E6:<br>1.99 nM(Delta),<br>6.38 nM(Omicron BA.1)<br>Calu-3:<br>13.5 nM(Delta)                                                                                                                                                                                                                                                                                                                                                                    |  | Omicron BA.2, Delta                                                                                                                                                                                                                                                                                                                                                                                                                                                                                                                                                                                              | Vero E6 Calu-3       |                       | al          |       |
| CT-P63 | Convalescent COVID-19 patients | RBD | Human IgG monoclonal antibody |  | Live viruses:<br>50.50 ng/mL<br>96.48 ng/mL<br>88.67 ng/mL<br>46.95 ng/mL<br>18.88 ng/mL<br>7.21 ng/mL<br>20.58 ng/mL<br>25.84 ng/mL<br>22.46 ng/mL<br>58.48 ng/mL<br>34.28 ng/mL<br>14.53 ng/mL<br>44.44 ng/mL<br>31.79 ng/mL<br><br>Pseudoviruses:<br>4.81 ng/mL<br>22.29 ng/mL<br>9.45 ng/mL<br>5.46 ng/mL<br>12.0 ng/mL<br>5.32 ng/mL<br>1.71 ng/mL<br>3.27 ng/mL<br>18.69 ng/mL<br>12.18 ng/mL<br>8.26 ng/mL<br>4.85 ng/mL<br>14.10 ng/mL<br>5.86 ng/mL<br>5.57 ng/mL<br>3.53 ng/mL<br>2.16 ng/mL |  | Live viruses:<br>WT,<br>B.1.1.529/BA.1,<br>B1.1.529/BA.2,<br>BA.2.12.1,<br>Delta(B.1.617.2),<br><br>Gamma(P.1),<br>Beta(B.1.351),<br>Kappa(B.1.617.1),<br>Alpha(B.1.1.7),<br>Epsilon(B.1.427),<br>Epsilon(B.1.429),<br>Eta(B.1.525),<br>Iota(B.1.526),<br>Zeta(P.2)<br><br>Pseudoviruses:<br>D614G,<br>B.1.1.529/BA.1,<br>B1.1.529/BA.2,<br>BA.2.12.1,<br>Omicron BA.3,<br>Delta(L452R/T478K/P681R),<br>Gamma(P.1),<br>Beta(B.1.351),<br>Lambda(C.37),<br>Mu(B.1.621),<br>Kappa(L452R/E484Q/P681R),<br>Alpha(B.1.1.7),<br>Epsilon(B.1.427),<br>Epsilon(B.1.429),<br>Eta(B.1.525),<br>Iota(B.1.526),<br>Zeta(P.2) | HEK293T              | Phase 3 (NCT05224856) | [333]       |       |
| 6M6    | Convalescent COVID-19 patients | RBD | Human IgG monoclonal antibody |  | 16.8 ng/mL<br>15.6 ng/mL<br>69.0 ng/mL<br>48.0 ng/mL<br>653 ng/mL<br>19.9 ng/mL                                                                                                                                                                                                                                                                                                                                                                                                                        |  | WT,<br>Alpha,<br>Beta,<br>Gamma,<br>Delta,<br>Omicron                                                                                                                                                                                                                                                                                                                                                                                                                                                                                                                                                            |                      | 7WK0                  | Preclinical | [334] |
| S2X324 | Convalescent COVID-19 patients | RBD | Human IgG monoclonal antibody |  | 2.72 ng/mL<br>3.68 ng/mL<br>2.78 ng/mL<br>3.86 ng/mL<br>2.46 ng/mL                                                                                                                                                                                                                                                                                                                                                                                                                                     |  | WA1/2020<br>BA.1<br>BA.2<br>BA.4-V3G<br>BA.5                                                                                                                                                                                                                                                                                                                                                                                                                                                                                                                                                                     | VeroE6-TMPRSS2 cells | 8ERQ                  | Preclinical | [335] |
| R1-32  | Convalescent COVID-19 patients | RBD | Human IgG monoclonal antibody |  | 4.03 nM<br>9.03 nM<br>33.7 nM                                                                                                                                                                                                                                                                                                                                                                                                                                                                          |  | Wildtype<br>Beta<br>Delta                                                                                                                                                                                                                                                                                                                                                                                                                                                                                                                                                                                        | 293T-ACE2 cells      | 7YDI                  | Preclinical | [336] |

|           |                                                      |     |                                     |    |                                                                                                                    |                                                                              |                      |            |                                      |       |
|-----------|------------------------------------------------------|-----|-------------------------------------|----|--------------------------------------------------------------------------------------------------------------------|------------------------------------------------------------------------------|----------------------|------------|--------------------------------------|-------|
| CR3022    | SARS-CoV-1 patient                                   | RBD | Human IgG1kappa monoclonal antibody |    |                                                                                                                    | Australia/VIC01/2020                                                         | Vero E6              | 7JN5       | Preclinical                          | [337] |
| S2M11     | Convalescent COVID-19 patients                       | RBM | Human IgG1m3 monoclonal antibody    | LS | 0.02 nM                                                                                                            | USA-WA1 / 2020                                                               | Vero E6              | 7K43       | Preclinical                          | [338] |
| S2E12     | Convalescent COVID-19 patients                       | RBD | Human IgG1m3 monoclonal antibody    | LS | 0.04 nM                                                                                                            | USA-WA1 / 2020                                                               | Vero E6              | 7K4N, 7R6X | Preclinical                          | [338] |
| SARS2-38  | Splenocytes of BALB/c mice                           | RBD | IgG1 monoclonal antibody            |    | 1 to 7 ng/mL                                                                                                       | B.1.1.7, B.1.429, B.1.1.298, B.1.222, B.1.617.1, B.1.617.2, B.1.526+S477N    | Vero E6              | 7MKL, 7MKM | Preclinical                          | [339] |
| 3E8       | BALB/c mice were immunized with Fc-tagged human ACE2 | RBD | Human IgG4 monoclonal antibody      |    | 0.04 nM                                                                                                            | SARS-CoV2 (IVCAS 6.7512)                                                     | Vero E6              | 7V61       | Preclinical                          | [340] |
| bsAb15    | Convalescent COVID-19 patients                       | RBD | Human IgG-ScFv monoclonal antibody  |    | 3.34 nM                                                                                                            | hCoV-19 / China / CAS-B001 / 2020                                            | Vero E6              |            | Preclinical                          | [341] |
| STE90-C11 | Convalescent COVID-19 patients                       | RBD | Human IgG1                          |    | 2.56a: 50nM Spike<br>0.99a: 10nM RBD                                                                               | B.1.617, B.1.525, B.1.526, B.1.1.33, B.1.258, and B.1.429/B.1.427            | VeroE6               | 7B3O       | Phase Ib/II trial (ID: NCT04674566). | [342] |
| ZCB11     | Convalescent COVID-19 patients                       | RBD | Human IgG1                          |    | 51 ng/mL,<br>85.1 ng/mL,<br>39.9 ng/mL,<br>56.9 ng/mL,<br>11.2 ng/mL,<br>36.8 ng/mL,<br>11.7 ng/mL,<br>27.7 ng/mL, | D614G, Alpha, Beta, Gamma, Delta, Omicron BA.1, Omicron BA.1.1, Omicron BA.2 | Vero E6              | 7XH8       | Preclinical                          | [343] |
| HP6017    | Convalescent COVID-19 patients                       | RBD | Human IgG                           |    |                                                                                                                    |                                                                              | HEK293F              |            | Preclinical                          | [344] |
| 10-40     | Convalescent COVID-19 patients                       | RBD | IgG monoclonal antibody             |    | 0.029 µg/mL,<br>0.045 µg/mL,<br>0.104 µg/mL,<br>0.079 µg/mL,<br>0.298 µg/mL,<br>0.139 µg/mL,<br>0.225 µg/mL,       | USA-WA1/2020<br>B.1.1.7<br>B.1.351<br>P.1<br>B.1.617.2<br>C.37<br>B.1.621    | Vero E6              | 7SD5       | Preclinical                          | [345] |
| C022      | Convalescent COVID-19 patients                       | RBD | IgG                                 |    | 173ng/mL,<br>255ng/mL,<br>455ng/mL,<br>250ng/mL,<br>377ng/mL                                                       | D614G<br>B.1.1.7,<br>B.1.351,<br>B.1.429,<br>B.1.536,                        | 293T <sub>ACE2</sub> | 7RKU       | Preclinical                          | [346] |
| C118      | Convalescent COVID-19 patients                       | RBD | IgG                                 |    | 440ng/mL,<br>316ng/mL,<br>709ng/mL,<br>359ng/mL,<br>464ng/mL,                                                      | D614G B.1.1.7,<br>B.1.351,<br>B.1.429,<br>B.1.536,                           | 293T <sub>ACE2</sub> | 7RKS       | Preclinical                          | [346] |
| MW01      | Convalescent                                         | RBD | Human monoclonal                    |    |                                                                                                                    |                                                                              | Huh7 Vero            | 7DJZ       | Preclinical                          | [347] |

|                       |                                |     |                                   |  |                                                                                                                                                                                         |                                                                             |                                                                                                                                         |                   |      |                       |       |
|-----------------------|--------------------------------|-----|-----------------------------------|--|-----------------------------------------------------------------------------------------------------------------------------------------------------------------------------------------|-----------------------------------------------------------------------------|-----------------------------------------------------------------------------------------------------------------------------------------|-------------------|------|-----------------------|-------|
|                       | COVID-19 patients              |     | antibody                          |  |                                                                                                                                                                                         |                                                                             |                                                                                                                                         |                   |      |                       |       |
| MW05                  | Convalescent COVID-19 patients | RBD | Human monoclonal antibody         |  |                                                                                                                                                                                         |                                                                             |                                                                                                                                         | Huh7 Vero         | 7DK0 | Preclinical           | [347] |
| 2H2                   | Mice                           | RBD | IgG1 monoclonal antibody          |  | 0.007 µg/mL                                                                                                                                                                             |                                                                             | nCoV-SH01 (GenBank: MT121215.1)                                                                                                         | VeroE6            | 7DK5 | Preclinical           | [348] |
| 3C1                   | Mice                           | RBD | IgG1 monoclonal antibody          |  | 3.127 µg/mL                                                                                                                                                                             | 31.4ng/mL                                                                   | nCoV-SH01 (GenBank: MT121215.1)                                                                                                         | VeroE6            | 7DD8 | Preclinical           | [348] |
| UT28K                 | Convalescent COVID-19 patients | RBD | Human IgG CH1 monoclonal antibody |  | Omicron variant : 200 pM)                                                                                                                                                               |                                                                             | WT, Alpha, Beta, Gamma, Delta                                                                                                           | VeroE6/T MPRSS2   | 7X70 | Preclinical           | [349] |
| CA521 <sup>FALA</sup> | Mice                           | RBD | IgG monoclonal antibody           |  | CA521 FALA:0.343 nM<br>hACE2protein:8.887 nM<br>pseudoviruses transduction into Huh-7: 0.121 nM<br>hACE2:0.104 nM                                                                       | CA521FALA:0.014 nM<br>CA13f SARS-CoV-2: 0.015nM<br>CA13f SARS-CoV: 0.019 nM |                                                                                                                                         | Vero              | 7E23 | Preclinical           | [350] |
| NAb 15033-7           | Convalescent COVID-19 patients | RBD | Human IgG                         |  | IgG 15033-7:550 pM<br>tetraivalent Fab-IgG and IgG-Fab Versions:60 and 37 pM                                                                                                            |                                                                             | 2019 nCoV/USA_WA 1/2020                                                                                                                 | Vero E6           | 7KXK | Preclinical           | [351] |
| 10D12                 | RenMab mice                    | RBD | IgG monoclonal antibody           |  |                                                                                                                                                                                         | 0.02 µg/mL                                                                  | E406W                                                                                                                                   | Huh-7 cells       |      | Preclinical           | [352] |
| 7B8                   | RenMab mice                    | RBD | IgG monoclonal antibody           |  |                                                                                                                                                                                         | 0.05 µg/mL, a                                                               | B1.1.7                                                                                                                                  | Huh-7 cells       |      | Preclinical           | [352] |
| 9G11                  | RenMab mice                    | RBD | IgG monoclonal antibody           |  |                                                                                                                                                                                         | 0.05 µg/mL                                                                  | E406W                                                                                                                                   | Huh-7 cells       |      | Preclinical           | [352] |
| FBR002                | Convalescent COVID-19 patients | RBM | Monoclonal antibody               |  | 81.9 ng/mL<br>234.9 ng/mL<br>2950 ng/mL<br>688.5 ng/mL                                                                                                                                  |                                                                             | D614G<br>BA.1<br>BA.4<br>BA.4/5                                                                                                         |                   |      | Phase 2 (NCT05279352) | [353] |
| mAb253                | Convalescent COVID-19          | RBD | Monoclonal antibody               |  | 55±8 ng/mL,<br>5±1 ng/mL                                                                                                                                                                |                                                                             | Victoria, B.1.617.2                                                                                                                     | HEK293T /17 cells |      | Preclinical           | [354] |
| COV89-22              | Convalescent COVID-19 patients | RBD | Monoclonal antibody               |  | NT <sub>50</sub> .<br>1.83 µg /mL<br>5.16 µg /mL<br>6.28 µg /mL<br>5.94 µg /mL<br>9.87 µg /mL<br>5.30 µg /mL<br>3.00 µg /mL<br>9.20 µg /mL<br>7.30 µg /mL<br>25.0 µg /mL<br>7.42 µg /mL |                                                                             | WT,<br>Alpha,<br>Beta,<br>Gamma,<br>Delta,<br>Mu,<br>Omicron BA.1,<br>Omicron BA.2,<br>BA.2.12.1,<br>Omicron BA.2.75,<br>Omicron BA.4/5 | Hela              | 8DTX | Preclinical           | [355] |
| COV72-37              | Convalescent COVID-19 patients | RBD | Monoclonal antibody               |  | NT <sub>50</sub> .<br>8.25 µg /mL<br>10.63 µg /mL<br>9.36 µg /mL<br>6.09 µg /mL<br>14.08 µg /mL<br>10.52 µg /mL<br>9.72 µg /mL                                                          |                                                                             | WT,<br>Alpha,<br>Beta,<br>Gamma,<br>Delta,<br>Mu,<br>Omicron BA.1,<br>Omicron BA.2,                                                     | Hela              |      | Preclinical           | [355] |

|                  |                                                   |     |                                              |  |                                                                                                                                                                                                                              |                                                                                                                           |                                                                                                                          |                         |               |             |       |
|------------------|---------------------------------------------------|-----|----------------------------------------------|--|------------------------------------------------------------------------------------------------------------------------------------------------------------------------------------------------------------------------------|---------------------------------------------------------------------------------------------------------------------------|--------------------------------------------------------------------------------------------------------------------------|-------------------------|---------------|-------------|-------|
|                  |                                                   |     |                                              |  | 10.35 µg /mL<br>10.59 µg /mL<br>24.2 µg /mL<br>7.85 µg /mL                                                                                                                                                                   |                                                                                                                           | BA.2.12.1,<br>Omicron<br>BA.2.75,<br>Omicron BA.4/5                                                                      |                         |               |             |       |
| NA8              | Convalescent COVID-19 patients                    | RBD | Monoclonal antibody                          |  | 0.008 µg /mL<br>0.002 µg /mL<br>0.004 µg /mL<br>0.450 µg /mL<br>0.005 µg /mL<br>0.008 µg /mL<br>5.701 µg /mL<br>0.512 µg /mL                                                                                                 |                                                                                                                           | WA-1,<br>Alpha,<br>Beta,<br>Delta,<br>Omicron BA.1,<br>Omicron BA.2,<br>Omicron BA.4,<br>BA.2.12.1                       | Vero-E6                 | 7U9P          | Preclinical | [356] |
| NE12             | Convalescent COVID-19 patients                    | RBD | Monoclonal antibody                          |  | 0.003 µg /mL<br>0.004 µg /mL<br>>10 µg /mL<br>0.001 µg /mL<br>2.819 µg /mL<br>0.498 µg /mL<br>0.412 µg /mL<br>1.742 µg /mL                                                                                                   |                                                                                                                           | WA-1,<br>Alpha,<br>Beta,<br>Delta,<br>Omicron BA.1,<br>Omicron BA.2,<br>Omicron BA.4,<br>BA.2.12.1                       | Vero-E6                 | 7U9O          | Preclinical | [356] |
| P4A2             | K18-hACE2-transgenic mice against SARS-CoV-2 VOCs | RBD | Monoclonal antibody                          |  | 230<br>ng/mL(WA1/2020)<br>45 ng/mL(BA.1)                                                                                                                                                                                     | 0.0093 µg /mL,<br>0.0099 µg /mL,<br>0.6002 µg /mL,<br>0.1158 µg /mL,<br>0.0131 µg /mL,<br>0.0121 µg /mL,<br>0.2616 µg /mL | WA1/2020,<br>Alpha,<br>Beta,<br>Gamma,<br>Kappa,<br>Delta,<br>BA.1                                                       | Vero E6                 | 7WVL          | Preclinical | [357] |
| CV3-1            | Convalescent COVID-19                             | RBD | SARS-CoV-2 spike (S)-neutralizing monoclonal |  | 0.004-0.014 µg/mL                                                                                                                                                                                                            |                                                                                                                           | b .1.1.7 (SARS-CoV2 a),<br>b .1.351 (b), P.1,<br>b .1.617.2,<br>b .1.429,<br>b .1.525 ,b .1.526,<br>b .1.617.1           | 293T-ACE2               | 7NAB          | Preclinical | [358] |
| CV3-25           | Convalescent COVID-19                             | RBD | SARS-CoV-2 spike-neutralizing monoclonal     |  | 0.05-0.2 µg/mL                                                                                                                                                                                                               |                                                                                                                           | b .1.1.7 (SARS-CoV2), b .1.351,<br>P.1, b .1.617.2,<br>b .1.429,<br>b .1.525,<br>b .1.526,<br>b.1.617.1 (k)              | V293T-ACE2              | 7NAB,<br>7RAQ | Preclinical | [358] |
| SW186            | Mice                                              | RBD | SARS-CoV-2 spike-neutralizing monoclonal     |  | 64 ng/mL<br>78 ng/mL<br>15 ng/mL<br>36 ng/mL<br>42 ng/mL<br>38 ng/mL<br><1 ng/mL                                                                                                                                             |                                                                                                                           | Wuhan-Hu-1,<br>B.1.1.7(Alpha),<br>B.1.351(Beta),<br>P.1(Gamma),<br>B.1.617.2(Delta)<br>,<br>C.37(Lambda),<br>B.1.621(Mu) | Huh-7                   | 8DT3          | Preclinical | [359] |
| sACE22.v2.4-IgG1 | Mice                                              | RBD | SARS-CoV-2 spike(S)-neutralizing monoclonal  |  | BA.1 omicron:<br>18±7 pM(Hela-hACE2-11,Engineered)<br>580±70 pM(Hela-hACE2-11,WT)<br>0.14±0.22 nM(Calu-3,Engineered)<br>7.5±9.2 nM(Calu-3,WT)<br><br>BA.2 omicron:<br>130±40 pM(Hela-hACE2-11,Engineered)<br>350±90 pM(Hela- |                                                                                                                           | BA.1 omicron,<br>BA.2 omicron,                                                                                           | Hela-hACE2-11<br>Calu-3 |               | Preclinical | [360] |

|           |                                        |     |                      |  | hACE2-11,WT)                                                                                            |  |                                                               |                 |            |             |       |
|-----------|----------------------------------------|-----|----------------------|--|---------------------------------------------------------------------------------------------------------|--|---------------------------------------------------------------|-----------------|------------|-------------|-------|
| 14-H-06   |                                        | RBD | Bi-specific antibody |  | 21.2 nM                                                                                                 |  | WA                                                            |                 | 7WPV       | Preclinical | [361] |
| VHH-E     | Llama                                  | RBD | Multivalent nanobody |  | 60 nM                                                                                                   |  | SARS-CoV-2/human/Germany/Heinsberg-01/2020                    | Vero E6         | 7KN5       | Preclinical | [362] |
| VHH-U     | Alpaca                                 | RBD | Multivalent nanobody |  | 286 nM                                                                                                  |  | SARS-CoV-2/human/Germany/Heinsberg-01/2020                    | Vero E6         |            | Preclinical | [362] |
| VHH-W     | Alpaca                                 | RBD | Multivalent nanobody |  | 257 nM                                                                                                  |  | SARS-CoV-2/human/Germany/Heinsberg-01/2020                    | Vero E6         | 7KN7       | Preclinical | [362] |
| mNb6      | Yeast                                  | RBD | Nanobody             |  | 54 pM                                                                                                   |  | France/IDF0372/2020                                           | Vero E6         | 7KKJ       | Preclinical | [363] |
| mNb6-tri  | Yeast                                  | RBD | Ttrivalent nanobody  |  | PSV: 120 pM                                                                                             |  | France/IDF0372/2020                                           | Vero E6         |            | Preclinical | [363] |
| Sb23      |                                        | RBD | Synthetic nanobody   |  | 0.6 µg/mL                                                                                               |  |                                                               | HEK293T-ACE2    | 7A25, 7A29 | Preclinical | [364] |
| H11-H4    | Llama                                  | RBD | Synthetic nanobody   |  | 34 nM                                                                                                   |  | Australia/VIC01/2020                                          | Vero E6         | 6ZBP       | Preclinical | [365] |
| H11-D4    | Llama                                  | RBD | Synthetic nanobody   |  | 28 nM                                                                                                   |  | Australia/VIC01/2020                                          | Vero E6         | 6Z43       | Preclinical | [365] |
| Sb#15     | convalescent COVID-19 patients         | RBD | Synthetic nanobody   |  | Sb#15:2.3µg/mL (147 nM)                                                                                 |  | B.1.1.7 (Alpha), B.1.351 (Beta), B.1.617.2 (Delta)            | Vero E6         | 3K1K       | Preclinical | [366] |
| Sb#68     | convalescent COVID-19 patients         | RBD | Synthetic nanobody   |  | 2.3µg/mL (138 nM)                                                                                       |  | B.1.1.7 (Alpha), B.1.351 (Beta), B.1.617.2 (Delta)            | Vero E6         | 7KLW       | Preclinical | [366] |
| Ty1       | Alpaca                                 | RBD | Alpaca nanobody      |  | 54 nM                                                                                                   |  |                                                               | HEK293T Vero E6 |            | Preclinical | [367] |
| Nb20      | Llama                                  | RBD | Nanobody             |  | 0.048 nM                                                                                                |  | SARS-CoV-2 (Munich strain)                                    | Vero E6         | 7JVB       | Preclinical | [368] |
| Nb21      | Llama                                  | RBD | Nanobody             |  | 0.022 nM                                                                                                |  | SARS-CoV-2 (Munich strain)                                    | Vero E6         | 7N9A, 7N9B | Preclinical | [368] |
| Nb34      | Llama                                  | RBD | Nanobody             |  | 1.125 nM                                                                                                |  | SARS-CoV-2 (Munich strain)                                    | Vero E6         | 7N9E       | Preclinical | [368] |
| Nb95      | Llama                                  | RBD | Nanobody             |  | 5.105 nM                                                                                                |  | SARS-CoV-2 (Munich strain)                                    | Vero E6         | 7N9C       | Preclinical | [368] |
| NB1A7     | A camel immunized with recombinant RBD | RBD | Nanobody             |  | 808.1 ± 1.02 nM (against RDB)<br>59.3 ± 1.40 nM (PRNT: ND <sub>50</sub> )                               |  | P.1, B.1.526, B.1.617.1, B.1.617.2                            | Vero E6 (PRNT)  | 7FAT       | Preclinical | [369] |
| NB1B11    | A camel immunized with recombinant RBD | RBD | Nanobody             |  | 709.4 ± 1.03 nM (against RDB)<br>36.5 ± 1.52 nM (PRNT: ND <sub>50</sub> )                               |  | P.1, B.1.526, B.1.617.1, B.1.617.2                            | Vero E6 (PRNT)  | 7FAU       | Preclinical | [369] |
| 7A3+8A2   | Camels                                 | RBD | Nanobodies           |  | 20 nM (WT)<br>6 nM (D614G)<br>2 nM (B.1.1.7)<br>0.87 nM (B.1.351)<br>0.14 nM (P.1)<br>27 nM (B.1.617.2) |  | Wuhan-Hu-1<br>D614G<br>B.1.1.7<br>B.1.351<br>P.1<br>B.1.617.2 | Vero E6         | 7TPR       | Preclinical | [370] |
| C5-trimer | Camelid                                | RBD | Nanobody             |  | Victoria - B; 18 pM<br>Alpha - B1.1.7: 25 pM                                                            |  | Victoria, Alpha, Beta                                         | Vero E6         | 7OAO       | Preclinical | [371] |
| Nb-0      | Mice                                   | RBD | Nanobody             |  |                                                                                                         |  |                                                               | HEK293          | 7R9D       | Preclinical | [372] |



|                |                          |     |          |  |                                                                                                                                       |             |                                                                                                   |                                |      |             |       |
|----------------|--------------------------|-----|----------|--|---------------------------------------------------------------------------------------------------------------------------------------|-------------|---------------------------------------------------------------------------------------------------|--------------------------------|------|-------------|-------|
| Fab_8D3        | Mice                     | RBD | Nanobody |  |                                                                                                                                       |             |                                                                                                   | HEK293                         | 7R9D | Preclinical | [372] |
| DL4            | Immunized alpaca         | RBD | Nanobody |  | 0.101 µg/mL (6.23 nM)<br>Fc-DL4: 3.23 µg/mL                                                                                           |             | Alpha (B.1.1.17), Beta (B.1.351), Gamma (P.1)                                                     | HEK293T                        | 7F5G | Preclinical | [373] |
| Nb12           | Nanomouse                | RBD | Nanobody |  | 248pM<br>64pM<br>286pM<br>2755pM<br>1874pM                                                                                            |             | USA-WA1/2020 (WA1)<br>B.1.1.7<br>B.1.351<br>P.1                                                   | Vero-E6                        | 7MY3 | Preclinical | [374] |
| Nb30           | Nanomouse                | RBD | Nanobody |  | 9374pM<br>538pM<br>2755pM<br>1874pM                                                                                                   |             | USA-WA1/2020 (WA1)<br>B.1.1.7<br>B.1.351<br>P.1                                                   | Vero-E6                        | 7MY2 | Preclinical | [374] |
| WNbFc2         | Alpacas                  | RBD | Nanobody |  | WT:0.33nM<br>N501Y<br>D614G:0.30nM                                                                                                    | 2.65nM      | WT (hCoV-19/Australia/VIC01/2020)SARS-CoV-2 (hCoV19/Australia/VIC2089/2020)                       |                                |      | Preclinical | [375] |
| WNbFc36        | Alpacas                  | RBD | Nanobody |  | WT:0.10nM<br>N501Y<br>D614G:0.11nM                                                                                                    | 0.97nM      | WT (hCoV-19/Australia/VIC01/2020)SARS-CoV-2 (hCoV19/Australia/VIC2089/2020)                       |                                |      | Preclinical | [375] |
| nCoV617        | Convalescent COVID-19    | RBD | Nanobody |  |                                                                                                                                       |             |                                                                                                   | Vero cells (Corning; no. 3988) | 7E3O | Preclinical | [376] |
| Nanosota-1C    | Camelidae family         | RBD | Nanobody |  |                                                                                                                                       |             | (US_WA-1 isolate) from CDC (Atlanta)                                                              | VeroE6                         | 7KM5 | Preclinical | [377] |
| Nanosota-1C-Fc | Camelidae family         | RBD | Nanobody |  |                                                                                                                                       |             | (US_WA-1 isolate) from CDC (Atlanta)                                                              | VeroE6                         |      | Preclinical | [377] |
| 2-3-Fc         | Fusing aSA3-Fc to aRBD-2 | RBD | Nanobody |  | Authentic:<br>10.3 ng/mL<br>4.6 ng/mL<br>2.6 ng/mL<br>5.3 ng/mL<br>Pseudotyped:<br>4.0 ng/mL<br>6.6 ng/mL<br>8.1 ng/mL<br>138.3 ng/mL |             | Authentic:<br>WT,<br>Beta,<br>Delta,<br>BA.1<br>Pseudotyped:<br>BA.1<br>BA.2,<br>BA.5,<br>BA.2.75 | ACE2-293T                      | 7X4I | Preclinical | [378] |
| aRBD-2-5-Fc    | Mice                     | RBD | Nanobody |  | 0.0830 nM<br>0.0511 nM<br>0.0438 nM<br>0.1087 nM<br>0.0271 nM<br>0.0769 nM<br>0.0293 nM                                               |             | WT,<br>Alpha,<br>Beta<br>Gamma,<br>Delta,<br>Kappa,<br>BA.1                                       |                                | 7VOA | Preclinical | [379] |
| X01            | Mice                     | RBD | Nanobody |  | 0.17 µg/mL<br>0.07 µg/mL<br>0.13 µg/mL<br>0.06 µg/mL<br>33.25 µg/mL                                                                   | 3.29 µg/mL  | B.1.1.7,<br>B.1.351,<br>B.1.1.28,<br>B.1.617.2,<br>B.1.1.529                                      | Vero E6                        | 7X7T | Preclinical | [380] |
| X10            | Mice                     | RBD | Nanobody |  | 0.07 µg/mL<br>0.02 µg/mL<br>0.09 µg/mL<br>0.17 µg/mL                                                                                  | 18.79 µg/mL | B.1.1.7,<br>B.1.351,<br>B.1.1.28,<br>B.1.617.2,                                                   | Vero E6                        | 7X7T | Preclinical | [380] |

|            |                                                           |            |                                     |  |                                                                                                                                                                                                                                                                        |                      |                                                                                      |                          |      |                                |       |
|------------|-----------------------------------------------------------|------------|-------------------------------------|--|------------------------------------------------------------------------------------------------------------------------------------------------------------------------------------------------------------------------------------------------------------------------|----------------------|--------------------------------------------------------------------------------------|--------------------------|------|--------------------------------|-------|
|            |                                                           |            |                                     |  | 12.22 µg/mL                                                                                                                                                                                                                                                            |                      | B.1.1.529                                                                            |                          |      |                                |       |
| X17        | Mice                                                      | RBD        | Nanobody                            |  | 0.28 µg/mL<br>0.29 µg/mL<br>1.02 µg/mL<br>0.54 µg/mL<br>1.67 µg/mL                                                                                                                                                                                                     | 0.005 µg/mL          | B.1.1.7,<br>B.1.351,<br>B.1.1.28,<br>B.1.617.2,<br>B.1.1.529                         | Vero E6                  | 7X7T | Preclinical                    | [380] |
| XG014      | Convalescent COVID-19 patients                            | RBD        | Nanobody                            |  | Huh-7:<br>0.014±0.002 µg/mL<br>0.021±0.002 µg/mL<br>0.032±0.004 µg/mL<br>0.017±0.002 µg/mL<br>Caco-2:<br>0.023±0.003 µg/mL<br>0.018±0.001 µg/mL<br>0.031±0.002 µg/mL<br>0.016±0.002 µg/mL                                                                              | 0.014 to 0.032 µg/mL | WT,<br>B.1.1.7,<br>B.1.351,<br>P.1                                                   | Huh-7<br>Caco-2          | 7V2A | Preclinical                    | [381] |
| P3E6       | Fully-vaccinated individuals after BA.1 natural infection | RBD        | Monoclonal antibody                 |  | 0.0105 µg/mL<br>0.0114 µg/mL<br>0.0153 µg/mL<br>0.0234 µg/mL<br>0.0183 µg/mL<br>0.0064 µg/mL<br>0.0204 µg/mL<br>0.11 µg/mL<br>0.0743 µg/mL                                                                                                                             |                      | WT,<br>Alpha,<br>Beta,<br>Gamma,<br>Delta,<br>BA.1,<br>BA.2,<br>BA.2.12.1,<br>BA.4/5 | Vero-E6-TMPRSS2          | 7YKJ | Preclinical                    | [382] |
| IMM-BCP-01 | Convalescent COVID-19 patients                            | RBD        | Three antibody cocktail             |  | REF (WA1/2020) 1.0nM<br>BavPat (D614G) 0.6 nM<br>Alpha 3.0 nM<br>Beta 13.5 nM<br>Gamma 24.8 nM<br>B.1.617(L452/E484 Q) 1.0 nM<br>Delta 0.4 nM<br>Delta plus 3.0 nM<br>Epsilon 0.6 nM<br>Kappa (complete sequence) 2.7 nM<br>Lambda 0.4 nM<br>Mu 9.1 nM<br>Zeta 1.53 nM |                      | WA1/2020<br>D614G,<br>BA.1, BA.1.1.                                                  | VeroE6                   | 7JVB | Phase 1 (NCT05429021)          | [282] |
| SAB-185    | Ranschromosomal bovine                                    | Ectodomain | Human IgG polyclonal antibody       |  |                                                                                                                                                                                                                                                                        |                      | USA-WA1 / 2020                                                                       | 293-ACE2-TMPRSS2         |      | Phase 2/3 (NCT04518410)        | [383] |
| XAV-19     | Swine glyco-humanized IgG                                 | RBD        | Polyclonal antibody                 |  |                                                                                                                                                                                                                                                                        |                      |                                                                                      |                          |      | Phase 2, Phase 3 (NCT04928430) | [384] |
| COV21      | Convalescent COVID-19 patients                            | RBD        | Human IgG polyclonal antibody       |  | 62.3 nM                                                                                                                                                                                                                                                                | 20–50 µg/mL          | Wu-Hu-1                                                                              | HEK293T-human ACE2 cells |      | Preclinical                    | [385] |
| C105       | Convalescent COVID-19 patients                            | RBD        | Human IgG polyclonal antibody       |  | 26.1 ng/mL                                                                                                                                                                                                                                                             |                      | Wu-Hu-1                                                                              | HEK293T-human ACE2 cells | 6XCA | Preclinical                    | [385] |
| bn03       | Camels                                                    | RBD        | A bispecific single-domain antibody |  | (Pseudovirus neutralization assay)<br>0.11-0.76 µg/mL                                                                                                                                                                                                                  |                      | Wuhan-Hu-1;<br>Alpha;<br>Beta;<br>Gamma;<br>Delta;<br>Omicron;                       | Huh-7                    | 7WHK | Preclinical                    | [386] |
| 7D6        | Mice                                                      | RBD        | Cross-neutralizing                  |  | 2.23 µg/mL                                                                                                                                                                                                                                                             |                      | B.1.1.7,<br>B.1.351, P.1                                                             | BHK21-hACE2              | 7EAM | Preclinical                    | [387] |

|                  |                                          |     |                               |  |                                                                                                                                                                                                                                                                      |                                                    |                                                                                                                                                                                           |                    |      |             |       |
|------------------|------------------------------------------|-----|-------------------------------|--|----------------------------------------------------------------------------------------------------------------------------------------------------------------------------------------------------------------------------------------------------------------------|----------------------------------------------------|-------------------------------------------------------------------------------------------------------------------------------------------------------------------------------------------|--------------------|------|-------------|-------|
|                  |                                          |     | antibody                      |  |                                                                                                                                                                                                                                                                      |                                                    | variants, the B.1.351 authentic virus                                                                                                                                                     |                    |      |             |       |
| 6D6              | Mice                                     | RBD | Cross-neutralizing antibody   |  | 1.77 µg/mL                                                                                                                                                                                                                                                           |                                                    | B.1.1.7, B.1.351, P.1 variants, the B.1.351 authentic virus                                                                                                                               | BHK21-hACE2        | 7EAN | Preclinical | [387] |
| XGv347           | Mice                                     | RBD | Antibodies against Omicron    |  | 0.006 µg/mL                                                                                                                                                                                                                                                          |                                                    | Omicron, Beta (B.1.351)                                                                                                                                                                   | 293T               | 7WED | Preclinical | [388] |
| SP1-77           | Single human VH-rearranging mouse        | RBD | Monoclonal antibody           |  | Pseudotype viruses:<br>20 ng/mL<br>28 ng/mL<br>16 ng/mL<br>15 ng/mL<br>36 ng/mL<br>19 ng/mL<br>11 ng/mL<br>76 ng/mL<br>6.5 ng/mL<br>33 ng/mL<br>7 ng/mL<br>16 ng/mL<br>8 ng/mL<br><br>Live Viruses:<br>1.1 ng/mL<br>1.1 ng/mL<br>0.8 ng/mL<br>0.8 ng/mL<br>9.7 ng/mL |                                                    | Pseudotype viruses:<br>G614, B.1.1.7, B.1.351, P.1, B.1.429, B.1.526.K484E, B.1.617, BA.1, BA.2, BA.3, BA.4/BA.5, BA.2.12.1<br><br>Live Viruses:<br>WA1, B.1.1.7, B.1.351, P.1, B.1.617.2 | ACE2-HEK293T cells | 7UPX | Preclinical | [389] |
| AB-3467          | RBD-immunized Ig-humanized mice          | RBD | IgG1 antibody                 |  | 0.328 µg/mL<br>0.314 µg/mL<br>0.274 µg/mL<br>0.322 µg/mL<br>0.27 µg/mL<br>0.145 µg/mL<br>0.296 µg/mL<br>0.576 µg/mL<br>0.473 µg/mL<br>0.271 µg/mL<br>0.226 µg/mL<br>0.352 µg/mL                                                                                      |                                                    | WT(clade A early) D614G B.1.17 B.1.351 B.1.617 B.1.617.2 P1 P2 B.1.525 B.1.427 B.1.429 C36                                                                                                | ACE2-HEK293T cells | 7MSQ | Preclinical | [390] |
| 910-30           | COVID-19 convalescent patient, Donor 910 | RBD | IgG1 monoclonal antibody      |  | 0.142 µg/mL                                                                                                                                                                                                                                                          |                                                    | USA-WA1/2020                                                                                                                                                                              | Vero-E6 cells      | 7KS9 | Preclinical | [391] |
| Bi-Nab35B5-47D10 | Convalescent COVID-19 patient            | RBD | bsAb                          |  | 0.046 nM<br>0.038 nM<br>0.360 nM<br>0.065 nM<br>0.079 nM<br>0.150 nM<br>0.670 nM                                                                                                                                                                                     | WT S1 protein: 0.023 nM<br>WT S2 protein: 628.3 nM | WT, Alpha, Beta, Kappa, Delta, Omicron BA.1, Omicron BA.2                                                                                                                                 | HEK293             |      | Preclinical | [392] |
| Fu2              | Alpaca                                   | RBD | Bispecific monomeric nanobody |  | 106 ng/mL                                                                                                                                                                                                                                                            |                                                    |                                                                                                                                                                                           | HEK293T-hACE2      | 7NS6 | Preclinical | [393] |
| CV38-142         | A COVID-19 patient                       | RBD | Cross-neutralizing antibody   |  | 3.46 µg/mL(IgG)<br>>100 µg/mL(Fab)                                                                                                                                                                                                                                   | K <sub>D</sub> =29.2 nM                            |                                                                                                                                                                                           |                    | 7LM9 | Preclinical | [394] |
| THSC20.HVTR04    | Convalescent COVID-19 patient            | RBD | Monoclonal antibody           |  |                                                                                                                                                                                                                                                                      | SARS-CoV-2 (Wuhan): K <sub>D</sub> =0.196 nM       | SARS-CoV-2 (Wuhan)                                                                                                                                                                        | HEK 293T           | 7Z0Y | Preclinical | [395] |

|                                  |                                                   |     |                                        |  |                                                                         |                                                 |                                                      |                         |           |                               |       |
|----------------------------------|---------------------------------------------------|-----|----------------------------------------|--|-------------------------------------------------------------------------|-------------------------------------------------|------------------------------------------------------|-------------------------|-----------|-------------------------------|-------|
| THSC20.HVTR26                    | Convalescent COVID-19 patient                     | RBD | Monoclonal antibody                    |  | Kappa: 0.003-0.01 µg/mL<br>Omicron: 2.71 µg/mL                          | SARS-CoV-2 (Wuhan):<br>K <sub>D</sub> =0.255 nM | SARS-CoV-2 (Wuhan),<br>Kappa,<br>Omicron             | HEK 293T                | 7Z0X      | Preclinical                   | [395] |
| CV3-13                           | Convalescent COVID-19 patient                     | RBD | Non-neutralizing antibody              |  |                                                                         | K <sub>D</sub> =55.2 nM(Fab)                    |                                                      |                         | 7RQ6      | Preclinical                   | [396] |
| SR31                             | Synthetic libraries by ribosome and phage display | RBD | Synthetic nanobody (sybody)            |  |                                                                         | K <sub>D</sub> =5.6 nM                          |                                                      | HEK293T                 | 7D2Z      | Preclinical                   | [397] |
| hu33                             | Mice                                              | RBD | Monoclonal antibody                    |  | ND <sub>50</sub> :<br>12.5 ng/mL<br>4.7 ng/mL<br>154.3 ng/mL            |                                                 | Beta,<br>Delta,<br>Omicron                           | Vero E6                 | 7WB5      | Preclinical                   | [398] |
| Nb15-NbH-Nb15                    | Mice                                              | RBD | Bispecific nanobody                    |  | 0.4 ng/mL<br>0.26 ng/mL<br>88.95 ng/mL<br>5.16 ng/mL                    |                                                 | WT,<br>Alpha,<br>Epsilon,<br>Delta                   |                         |           | Preclinical                   | [399] |
| P4A1                             | Convalescent COVID-19 patient                     | RBD | Neutralizing antibody                  |  | 2.077 nM                                                                |                                                 | WT                                                   | HEK293                  | 7CJF      | Preclinical                   | [400] |
| MR3                              | Synthetic nanobody                                | RBD | Synthetic nanobody (sybody)            |  | 0.42 µg/mL                                                              |                                                 |                                                      | VeroE6-hACE2            | EMD-31328 | Preclinical                   | [401] |
| XVR011(humVHH_S56A/LALA-Fc/Gen2) | Hamster                                           | RBD | Neutralizing heavy chain-only antibody |  | PRNT <sub>50</sub> =0.13 µg/mL                                          | K <sub>D</sub> >20 µM                           | BetaCov/Belgium/GHB-03021/2020                       | Vero E6 cells           |           | Phase 1, Phase2 (NCT04884295) | [402] |
| S2P6                             | COVID-19 convalescent individuals                 | RBD | Monoclonal antibody                    |  | 1.4 µg/mL                                                               | K <sub>D</sub> =7 µM                            |                                                      | Vero-E6                 | 7RNJ      | Preclinical                   | [403] |
| S1D7                             | Mice                                              | RBD | Monoclonal antibody                    |  | 405.2 ng/mL                                                             | 42.7 ng/mL                                      |                                                      | VeroE6/TMPRSS2          |           | Preclinical                   | [404] |
| S3D8                             | Mice                                              | RBD | Monoclonal antibody                    |  | 139 ng/mL                                                               | 57.7 ng/mL                                      |                                                      |                         |           | Preclinical                   | [404] |
| C98C7                            | Convalescent COVID-19 patient                     | RBD | Monoclonal antibody                    |  | 0.013 µg/mL<br>0.015 µg/mL<br>0.012 µg/mL<br>0.023 µg/mL<br>1.067 µg/mL |                                                 | Wuhan,<br>Alpha,<br>Gamma,<br>Delta,<br>Omicron BA.1 |                         | 7SWO      | Preclinical                   | [405] |
| G32Q4                            | Convalescent COVID-19 patient                     | RBD | Monoclonal antibody                    |  | 0.578 µg/mL<br>1.476 µg/mL<br>0.089 µg/mL<br>0.316 µg/mL<br>6.666 µg/mL |                                                 | Wuhan,<br>Alpha,<br>Gamma,<br>Delta,<br>Omicron BA.1 |                         | 7SWP      | Preclinical                   | [405] |
| 3-2A2-4                          | Convalescent COVID-19 patients                    | RBD | Nanobody                               |  | 0.102 µg/mL<br>0.115 µg/mL<br>0.098 µg/mL<br>0.130 µg/mL<br>0.106 µg/mL |                                                 | WT,<br>Alpha,<br>Beta,<br>Delta,<br>Omicron BA.1     |                         | 7X2L      | Preclinical                   | [406] |
| ZWD12                            | Mice                                              | RBD | Monoclonal antibody                    |  | 258 ng/mL<br>169 ng/mL<br>54 ng/mL<br>915 ng/mL                         |                                                 | Wuhan-Hu-1,<br>B.1.351,<br>B.1.617.2,<br>B.1.1.529   |                         | 7WWL      | Preclinical                   | [407] |
| KC3.ep3                          | Synthetic nanobody                                | RBD | Nanobody                               |  | 1.82±1.09 ng/mL<br>38.53±3.98 ng/mL                                     | 34±1 pM                                         |                                                      | HEK293T,<br>VeroE6      |           | Preclinical                   | [408] |
| nCoVmab1                         | Synthetic nanobody                                | RBD | Monoclonal antibody                    |  | 0.010 µg/mL                                                             | 16 nM                                           |                                                      | Vero E6                 |           | Preclinical                   | [409] |
| S1-27                            | Llama                                             | RBD | Nanobody                               |  | 19.5 nM                                                                 |                                                 |                                                      | TMPRSS2 + Vero E6 cells |           | Preclinical                   | [410] |

|             |                                |     |                     |  |                                                                                                 |                                                                                                  |                                                                            |                                              |              |                       |       |
|-------------|--------------------------------|-----|---------------------|--|-------------------------------------------------------------------------------------------------|--------------------------------------------------------------------------------------------------|----------------------------------------------------------------------------|----------------------------------------------|--------------|-----------------------|-------|
| S1-23       | Llama                          | RBD | Nanobody            |  | 5.7 nM                                                                                          |                                                                                                  |                                                                            | TMPrSS2 + Vero E6 cells                      |              | Preclinical           | [410] |
| COV2-2676   | Mice                           | RBD | Monoclonal antibody |  | 501 ng/mL                                                                                       | 896 ng/mL                                                                                        | WA1/2020                                                                   | Vero E6                                      |              | Preclinical           | [411] |
| COV2-2489   | Mice                           | RBD | Monoclonal antibody |  | 199 ng/mL                                                                                       | 1438 ng/mL                                                                                       | WA1/2020                                                                   | Vero E6                                      |              | Preclinical           | [411] |
| 2B04        | Convalescent COVID-19 patients | RBD | Monoclonal antibody |  | 0.04 µg/mL                                                                                      |                                                                                                  |                                                                            | Chimeric VSV expressing SARS-CoV-2 S protein | 7K9I<br>7K9H | Phase 1 (NCT04644120) | [412] |
| 2C03        | Convalescent COVID-19 patients | RBD | Monoclonal antibody |  | 5 µg/mL                                                                                         |                                                                                                  |                                                                            | Chimeric VSV expressing SARS-CoV-2 S protein |              | Preclinical           | [412] |
| XMA01       | Convalescent COVID-19 patients | RBD | Monoclonal antibody |  | 23.6 ng/mL                                                                                      |                                                                                                  | Omicron                                                                    | BHK21-hACE2 cells                            | 7WHZ         | Preclinical           | [413] |
| XMA04       | Convalescent COVID-19 patients | RBD | Monoclonal antibody |  | 24.9 ng/mL                                                                                      |                                                                                                  | Omicron                                                                    | BHK21-hACE2 cells                            | 7WI0         | Preclinical           | [413] |
| 5-7         | Convalescent COVID-19 patients | NTD | Monoclonal antibody |  | 0.050 µg/mL<br>0.595 µg/mL<br>0.905 µg/mL<br>>20 µg/mL<br>0.760 µg/mL<br>>20 µg/mL<br>>20 µg/mL |                                                                                                  | WT,<br>B.1.1.7,<br>B.1.351,<br>P.1,<br>B.1.526,<br>B.1.427/9,<br>B.1.617.2 | Vero E6 cells                                | 7RW2         | Preclinical           | [414] |
| aRBD-2-5    | Alpaca                         | RBD | Nanobody            |  | ND <sub>50</sub> :0.043 nM                                                                      |                                                                                                  | USA-WA1/2020                                                               | Vero E6                                      | 7VOA         | Preclinical           | [415] |
| aRBD-2-7    | Alpaca                         | RBD | Nanobody            |  | ND <sub>50</sub> :0.111 nM                                                                      |                                                                                                  | USA-WA1/2020                                                               | Vero E6                                      | 7FH0         | Preclinical           | [415] |
| S2-4D       | Mice                           | RBD | Monoclonal antibody |  |                                                                                                 | 20.05±1.69 µg/mL<br>20.88±3.93 µg/mL<br>37.10±6.12 µg/mL<br>27.20±8.03 µg/mL<br>21.47±4.23 µg/mL | WT,<br>Alpha,<br>Epsilon,<br>Delta,<br>Gamma                               | Vero E6                                      |              | Preclinical           | [416] |
| S2-5D       | Mice                           | RBD | Monoclonal antibody |  |                                                                                                 | 25.80±4.72 µg/mL<br>21.84±2.23 µg/mL<br>21.18±3.51 µg/mL<br>15.00±3.27 µg/mL<br>16.43±3.03 µg/mL | WT,<br>Alpha,<br>Epsilon,<br>Delta,<br>Gamma                               | Vero E6                                      |              | Preclinical           | [416] |
| S2-8D       | Mice                           | RBD | Monoclonal antibody |  |                                                                                                 | 20.78±3.32 µg/mL<br>12.88±5.11 µg/mL<br>21.00±8.63 µg/mL<br>30.54±6.60 µg/mL<br>10.92±3.59 µg/mL | WT,<br>Alpha,<br>Epsilon,<br>Delta,<br>Gamma                               | Vero E6                                      |              | Preclinical           | [416] |
| PR1077      | Mice                           | RBD | Monoclonal antibody |  | 6.810 ng/mL<br>27.9 ng/mL                                                                       | 2.58 ng/mL                                                                                       | Wuhan/WIV04/2019                                                           | HEK293-ACE2, Vero E6                         | 7DEO         | Preclinical           | [417] |
| RBD-chAb-25 | Mice                           | RBD | Monoclonal antibody |  | 25.44 ng/mL<br>4.32 ng/mL                                                                       |                                                                                                  | WT (TCDC#4), D614G                                                         | Vero E6                                      | 7EJ4         | Preclinical           | [418] |
| RBD-chAb-45 | Mice                           | RBD | Monoclonal antibody |  | 2.30 ng/mL<br>1.57 ng/mL                                                                        |                                                                                                  | WT (TCDC#4), D614G                                                         | Vero E6                                      | 7EJ5         | Preclinical           | [418] |
| Sb45        | Synthetic nanobody             | RBD | Nanobody            |  | K <sub>D</sub> =47.1 nM                                                                         |                                                                                                  |                                                                            |                                              | 7KGJ         | Preclinical           | [419] |
| 54042-4     | Convalescent COVID-19 patients | RBD | Monoclonal antibody |  | 3.2 ng/mL<br>5.5 ng/mL<br>9.7 ng/mL<br>3.7 ng/mL<br>1.5 ng/mL                                   |                                                                                                  | USA-WA1, Alpha, Beta, Gamma, Delta,                                        | Vero E6                                      | 7T01         | Preclinical           | [420] |

|            |                                |     |                     |  |                                                                                                                              |                                                                                                                                      |                                                                                                                                             |                                    |              |             |       |
|------------|--------------------------------|-----|---------------------|--|------------------------------------------------------------------------------------------------------------------------------|--------------------------------------------------------------------------------------------------------------------------------------|---------------------------------------------------------------------------------------------------------------------------------------------|------------------------------------|--------------|-------------|-------|
| 2H04       | Mice                           | RBD | Monoclonal antibody |  | 154 ng/mL                                                                                                                    | 602 ng/mL<br>8596 ng/mL<br>2084 ng/mL<br>6287 ng/mL<br>274 ng/mL<br>1562 ng/mL<br>785 ng/mL<br>175 ng/mL<br>5363 ng/mL<br>3378 ng/mL | D614G,<br>B.1.1.7,<br>Wash-B.1.351,<br>Wash-B.1.1.28,<br>B.1.429,<br>B.1.617.1,<br>B.1.526,<br>Denmark<br>B.1.1.298,<br>Scotland<br>B.1.222 | Vero-hACE2-TMPRSS2 cells           | 7K9K<br>7K9J | Preclinical | [421] |
| 9-105      | Convalescent COVID-19 patients | RBD | Monoclonal antibody |  | 0.0035 µg/mL<br>0.0019 µg/mL<br>0.00092 µg/mL                                                                                |                                                                                                                                      | Wuhan-Hu-1                                                                                                                                  | 293FT/ACE2/TMPRSS2, Calu-3, Caco-2 |              | Preclinical | [422] |
| 10-121     | Convalescent COVID-19 patients | RBD | Monoclonal antibody |  | 0.018 µg/mL<br>0.12 µg/mL<br>0.015 µg/mL                                                                                     |                                                                                                                                      | Wuhan-Hu-1                                                                                                                                  | 293FT/ACE2/TMPRSS2, Calu-3, Caco-2 |              | Preclinical | [422] |
| Cv2.1169   | Convalescent COVID-19 patients | RBD | Monoclonal antibody |  | 331 ng/mL                                                                                                                    |                                                                                                                                      | BA.2                                                                                                                                        | Vero E6                            | 7QEZ         | Preclinical | [423] |
| Cv2.3194   | Convalescent COVID-19 patients | RBD | Monoclonal antibody |  | 40.5 ng/mL                                                                                                                   |                                                                                                                                      | BA.2                                                                                                                                        | Vero E6                            |              | Preclinical | [423] |
| XG014      | Convalescent COVID-19 patients | RBD | Monoclonal antibody |  | 0.004-0.018 µg/mL                                                                                                            |                                                                                                                                      | B.1.1.7,<br>B.1.351,<br>P.1,<br>B.1.617.2                                                                                                   | Huh-7                              | 7V2A         | Preclinical | [424] |
| P5-22      | Convalescent COVID-19 patients | RBD | Monoclonal antibody |  | ~0.007214 µg/mL                                                                                                              |                                                                                                                                      | BetaCoV/JS02/human/2020                                                                                                                     | HEK293/ACE2 cells                  |              | Preclinical | [425] |
| P14-44     | Convalescent COVID-19 patients | RBD | Monoclonal antibody |  | 0.7066 µg/mL                                                                                                                 |                                                                                                                                      | BetaCoV/JS02/human/2020                                                                                                                     | HEK293/ACE2 cells                  | 7FCQ         | Preclinical | [425] |
| Nb1-Nb2-Fc | Synthetic nanobody             | RBD | Nanobody            |  | 0.0168 nM<br>0.0117 nM<br>0.0097 nM<br>0.0987 nM<br>0.0232 nM<br>1.46 nM                                                     |                                                                                                                                      | WT,<br>Alpha,<br>Beta,<br>Gamma,<br>Delta,<br>Omicron                                                                                       | HEK293T                            |              | Preclinical | [426] |
| NM1267     | Mice                           | RBD | Nanobody            |  | 0.33 nM<br>0.78 nM<br>52.55 nM                                                                                               |                                                                                                                                      | B.1,<br>B.1.351,<br>B.1.617.2                                                                                                               | Caco-2                             |              | Preclinical | [427] |
| NM1268     | Mice                           | RBD | Nanobody            |  | 2.37 nM<br>6.06 nM<br>0.67 nM                                                                                                |                                                                                                                                      | B.1,<br>B.1.351,<br>B.1.617.2                                                                                                               | Caco-2                             |              | Preclinical | [427] |
| Re9F06     | Alpaca                         | RBD | Nanobody            |  | K <sub>D</sub> =4 nM                                                                                                         |                                                                                                                                      |                                                                                                                                             |                                    |              | Preclinical | [428] |
| Re9B09     | Alpaca                         | RBD | Nanobody            |  | K <sub>D</sub> =20 pM<br>K <sub>D</sub> =20 pM<br>K <sub>D</sub> =100 pM<br>K <sub>D</sub> =100 pM<br>K <sub>D</sub> =200 pM |                                                                                                                                      | WT,<br>B.1.1.7,<br>B.1.351,<br>P.1,<br>B.1.427/B.1.429                                                                                      |                                    |              | Preclinical | [428] |
| FD20       | Convalescent COVID-19 patients | RBD | Monoclonal antibody |  | 12.0 nM<br>10.7 nM<br>22.4 nM<br>12.4 nM<br>12.6 nM                                                                          |                                                                                                                                      | WT,<br>B.1.1.7,<br>B.1.35,<br>P.1,<br>B.1.617.2                                                                                             | VeroE6-hACE2                       | 7CYV         | Preclinical | [429] |
| 1F         | Convalescent COVID-19 patients | RBD | Monoclonal antibody |  | 18 ng/mL                                                                                                                     | 1.63 ng/mL                                                                                                                           | SARS-CoV-2/SH01/human/2020/CHN                                                                                                              | Vero-E6 cells                      |              | Preclinical | [430] |

|         |                                |     |                     |  |                                                                                                                             |             |                                                                                                            |                                  |      |             |       |
|---------|--------------------------------|-----|---------------------|--|-----------------------------------------------------------------------------------------------------------------------------|-------------|------------------------------------------------------------------------------------------------------------|----------------------------------|------|-------------|-------|
| Ab08    | Convalescent COVID-19 patients | RBD | Monoclonal antibody |  | 0.18 µg/mL,<br>0.19 µg/mL,<br>0.18 µg/mL,<br>0.26 µg/mL,<br>0.20 µg/mL,<br>1.65 µg/mL<br><br>PRNT <sub>50</sub> : 1.18µg/mL |             | Wuhan-Hu-1,<br>Omicron BA.1,<br>D614G,<br>Omicron,<br>BA.1.1,<br>BA.2.12.1,<br><br>Authentic<br>Wuhan-Hu-1 | VeroE2-<br>hACE6,<br><br>Vero E6 |      | Preclinical | [431] |
| GAR05   | Convalescent COVID-19 patients | RBD | Monoclonal antibody |  | 28 ng/mL<br>50 ng/mL<br>82.45 ng/mL<br>71.31 ng/mL<br>198.9 ng/mL<br>337.6 ng/mL                                            |             | Wuhan-Hu-1,<br>Delta,<br>Omicron A.2.2,<br>Omicron BA1,<br>Omicron BA2,<br>Omicron BA5                     | Vero E6                          |      | Preclinical | [432] |
| GAR12   | Convalescent COVID-19 patients | RBD | Monoclonal antibody |  | 182 ng/mL<br>255 ng/mL<br>12.77 ng/mL<br>16.17 ng/mL<br>26.58 ng/mL<br>62.59 ng/mL                                          |             | Wuhan-Hu-1,<br>Delta,<br>Omicron A.2.2,<br>Omicron BA1,<br>Omicron BA2,<br>Omicron BA5                     | Vero E6                          |      | Preclinical | [432] |
| sd1.040 | Convalescent COVID-19 patients | RBD | Monoclonal antibody |  | 245 ng/mL                                                                                                                   |             | SARS-CoV-2/human/Czech Republic/951/2020                                                                   | 293T                             | 8D48 | Preclinical | [433] |
| rbd.042 | Convalescent COVID-19 patients | RBD | Monoclonal antibody |  |                                                                                                                             |             | SARS-CoV-2/human/Czech Republic/951/2020                                                                   | 293T                             |      | Preclinical | [433] |
| ShAb01  | Shark                          | RBD | Nanobody            |  | 609 ng/mL,<br>420 ng/mL,<br>619 ng/mL,<br>188 ng/mL,<br>>18000 ng/mL,<br>>12000 ng/mL                                       |             | WA-1,<br>Alpha,<br>Beta,<br>Delta,<br>Omicron BA.1,<br>Omicron BA.4/5                                      | HEK293T<br>/17 cells             |      | Preclinical | [434] |
| ShAb02  | Shark                          | RBD | Nanobody            |  | 52 ng/mL,<br><23 ng/mL,<br><23 ng/mL,<br>15 ng/mL,<br>178 ng/mL,<br>1003 ng/mL                                              |             | WA-1,<br>Alpha,<br>Beta,<br>Delta,<br>Omicron BA.1,<br>Omicron BA.4/5                                      | HEK293T<br>/17 cells             |      | Preclinical | [434] |
| P2D9    | Convalescent COVID-19 patients | RBD | Monoclonal antibody |  | 7.5 ng/mL,<br>3 ng/mL,<br>0.8 ng/mL,<br>3.2 ng/mL,<br>9.1 ng/mL,<br>11.7 ng/mL,<br>138.1 ng/mL,<br>125 ng/mL,<br>75.3 ng/mL | 0.028 ug/ml | WA-1,<br>Alpha,<br>Beta,<br>Gamma,<br>Delta,<br>BA.1,<br>BA.2,<br>BA.2.12.1,<br>BA.4/5                     | HEK293T<br>/17 cells             |      | Preclinical | [435] |

IV: intravenous infusion, IM: intramuscular infusion  
RBD: receptor binding domain, RBM: receptor binding motif  
mAb: monoclonal antibody, rAb: recombinant antibody

**Table S3: Summary of host-targeted agents against SARS-CoV-2**

| Host factor | Drug name           | Type        | IC <sub>50</sub>                                                                       | EC <sub>50</sub>                          | CC <sub>50</sub>    | Cell line                           | SARS-CoV-2 strain                                                                        | Status                | Ref.  |
|-------------|---------------------|-------------|----------------------------------------------------------------------------------------|-------------------------------------------|---------------------|-------------------------------------|------------------------------------------------------------------------------------------|-----------------------|-------|
| ACE2        | APN01               | Miniprotein | 6.08 μM                                                                                |                                           | 6259 μg/mL          | Vero E6                             | A clinical SARS-CoV-2 isolate                                                            | Phase 2 (NCT04335136) | [436] |
|             | LCB1                | Miniprotein | 23.54 pM                                                                               | <50 pM                                    |                     | Vero E6                             | USA_WA1/2020                                                                             | Preclinical           | [437] |
|             | LCB3                | Miniprotein | 48.1 pM                                                                                | <50 pM                                    |                     | Vero E6                             | USA_WA1/2020                                                                             | Preclinical           | [437] |
|             | ACE2615-foldon-T27W | Miniprotein | 0.08μg/mL                                                                              |                                           |                     | Vero E6                             | USA_WA1/2020                                                                             | Preclinical           | [438] |
|             | ACE2615-foldon-T27Y | Miniprotein | 0.14μg/mL                                                                              |                                           |                     | Vero E6                             | USA_WA1/2020                                                                             | Preclinical           | [438] |
|             | CVD313              | Miniprotein | 0.073 ± 0.02μg/mL                                                                      |                                           |                     | Vero E6                             | USA-WA1/2020                                                                             | Preclinical           | [439] |
|             | CVD310              | Miniprotein | 0.089 ± 0.01μg/mL                                                                      |                                           |                     | Vero E6                             | USA-WA1/2020                                                                             | Preclinical           | [439] |
|             | sACE2(v1)           | Miniprotein | 0.37±0.06nM<br>0.27±0.12nM<br>0.21±0.05nM<br>0.23±0.03nM<br>0.21±0.06nM<br>0.34±0.08nM |                                           |                     | Vero-CCL81                          | Wild-type, Alpha, Beta, Gamma, Delta, Omicron                                            | Preclinical           | [440] |
|             | P10                 | Peptide     | 42 nM                                                                                  |                                           |                     | Calu-3                              | #SARS-CoV-2 / PSL2020                                                                    | Preclinical           | [441] |
|             | P8                  | Peptide     | 46 nM                                                                                  |                                           |                     | Calu-3                              | #SARS-CoV-2 / PSL2020                                                                    | Preclinical           | [441] |
|             | P9                  | Peptide     | 53 nM                                                                                  |                                           |                     | Calu-3                              | #SARS-CoV-2 / PSL2020                                                                    | Preclinical           | [441] |
|             | Dalbavancin         | Peptide     | HEK293/hACE2 cells: ~53 nM                                                             | 12.07 nM (Vero E6),<br>173.06 nM (Caco-2) | > 3200 nM (Vero E6) | Vero E6, Caco-2, HEK293/hACE2       | A clinical SARS-CoV-2 isolate                                                            | Preclinical           | [442] |
|             | SB27012             | Small       | 7.7±0.5 μM                                                                             |                                           |                     | Vero monkey kidney epithelial cells | SARS-CoV-2 lineage A                                                                     | Preclinical           | [443] |
|             | SB27041             | Small       | 2.2 μM                                                                                 |                                           |                     | Vero monkey kidney epithelial cells | SARS-CoV-2 lineage A                                                                     | Preclinical           | [443] |
|             | SB27047             | Small       | 2.6 μM                                                                                 |                                           |                     | Vero monkey kidney epithelial cells | SARS-CoV-2 lineage A                                                                     | Preclinical           | [443] |
|             | Bifonazole          | Small       | 36.84 μM,<br>40.00 μM                                                                  |                                           |                     | VerohACE2-TMPRSS2cells, Vero E6     | VSV (Indiana serotype) with SARS-CoV-2 spike from with the Wuhan-Hu-1 isolate MN908947.3 | Preclinical           | [444] |
|             | Methazolamide       | Small       |                                                                                        |                                           |                     | Vero E6                             | hCoV-19/CHN/SYSU-IHV/2020                                                                | Preclinical           | [445] |
|             | NMT5                | Small       |                                                                                        | 5.28 μM                                   | 48.66 μM            | HeLa-ACE2                           | USA-WA1 / 2020                                                                           | Preclinical           | [446] |
|             | Bruceine A          | Small       |                                                                                        | 54±5 nM                                   | >40μM               | Vero E6                             | USA-WA1/2020, BEI NR-52281                                                               | Preclinical           | [447] |
|             | Gamabufotalin       | Small       |                                                                                        | 2.7±0.2 nM                                | >40μM               | Vero E6                             | USA-WA1/2020, BEI NR-52281                                                               | Preclinical           | [447] |
|             | h11B11              | Antibody    | 0.95±0.12μg/mL<br>0.61±0.13μg/mL<br>0.56±0.19μg/mL                                     |                                           |                     | HEK293T-hACE2                       | Wuhan-1, D614G, B.1.1.7, B.1.351                                                         | Preclinical           | [448] |



|                      |                               |               |                 |                                                                                               |                                            |                                           |                                                               |                                     |       |
|----------------------|-------------------------------|---------------|-----------------|-----------------------------------------------------------------------------------------------|--------------------------------------------|-------------------------------------------|---------------------------------------------------------------|-------------------------------------|-------|
|                      |                               |               | 1.59±0.20µg/mL  |                                                                                               |                                            |                                           |                                                               |                                     |       |
|                      |                               |               |                 |                                                                                               |                                            |                                           |                                                               |                                     |       |
| <b>TMPRSS2</b>       | Camostat mesylate             | Small         | 9.3±1.2 nM      | 1 µM                                                                                          |                                            | 293T and Vero                             | hCoV-19/Germany/FI110 3201/2020 SARS-CoV-2 isolate Munich 929 | Phase 4 (NCT04338 906)              | [449] |
|                      | Nafamostat mesylate           | Small         | 2.2 nM          | 5 nM                                                                                          |                                            | Calu-3                                    | USA-WA1 / 2020                                                | Phase 3 (NCT04390 594,NCT04 483960) | [450] |
|                      | Enzalutamide                  | Small         |                 |                                                                                               |                                            | A549                                      | SARS-CoV-2/England/IC19/202 2 (IC19)                          | Phase 2 (NCT04456 049)              | [451] |
|                      | Halofuginone                  | Small         | 30 nM, 0.069 µM |                                                                                               | ~5.54 µM                                   | Caco-2 cells, TMPRSS2-HiBiT-BEAS-2B cells | USA-WA1/2020                                                  | Preclinical                         | [452] |
|                      | Homoharringtonine             | Small         | 30 nM, 0.061 µM |                                                                                               | >10 µM                                     | Caco-2 cells, TMPRSS2-HiBiT-BEAS-2B cells | USA-WA1/2020                                                  | Preclinical                         | [452] |
|                      | N-0385                        | Small         | 1.9±1.4nM       | 2.6 to 26.5 nM                                                                                | 3.5 mM                                     | Calu-3                                    | VIDO-01, B.1.1.7, B.1.351, P.1 and B.1.617.2                  | Preclinical                         | [453] |
|                      | Avoralstat                    | Small         | 2.7±0.19 nM     | 2.8±0.7 µM                                                                                    |                                            | Calu-3 2B4 cells                          | 2019n-CoV/USA-WA1/2019 strain of SARS-CoV-2                   | Preclinical                         | [454] |
|                      | Benzamidine                   | Small         | 120±20 µM       |                                                                                               |                                            | Biochemical assay                         | Biochemical assay                                             | Preclinical                         | [455] |
|                      | 6-amidino-2-naphthol          | Small         | 1.6±0.5 µM      |                                                                                               |                                            | Biochemical assay                         | Biochemical assay                                             | Preclinical                         | [455] |
|                      | Sunflower trypsin inhibitor-1 | Small         | 0.4±0.2 µM      |                                                                                               |                                            | Biochemical assay                         | Biochemical assay                                             | Preclinical                         | [455] |
|                      | MM3122                        | Small         | 340 pM          | 430 pM                                                                                        |                                            | Calu-3                                    | HCoV EMC/2012 strain                                          | Preclinical                         | [456] |
|                      | Otamixaban                    | Small         | 18.7 µM         |                                                                                               |                                            | Calu-3                                    | hCoV-19/Germany/FI110 3201/2020                               | Preclinical                         | [457] |
|                      | Compound 7                    | Small         |                 | Vero E6-TMPRSS2: 14.33±0.23µM<br>13.82±0.79µM<br>15.96±1.30µM<br>9.815±0.33µM<br>13.67±0.29µM | Vero E6: 110.90µM<br>Calu3: 94.87µM        | Vero E6, Vero E6-TMPRSS2, Calu3           | WT, B1.1.7, B1.351, B1.617, B1.618                            | Preclinical                         | [458] |
|                      | Tafenoquine                   | Small         | 31.8 µM         | Vero E6-TMPRSS2: 11.30±1.14µM<br>11.61±1.67µM<br>24.22±6.31µM<br>23.61±1.06µM<br>23.45±4.93µM | Vero E6: 9.74±1.31µM<br>Calu3: 7.0±0.31 µM | Vero E6 HEK-293T Calu3                    | NTU02, GenBank: MT066176.1                                    | Phase2 (NCT04533 347)               | [458] |
| <b>Cathepsin B/L</b> | Alpha-1 antitrypsin           | Human protein | 21.2 µM         |                                                                                               |                                            | Vero E6                                   | BetaCoV/France/DF0372/ 2020 (#014V-03890)                     | Early Phase 1(NCT0438 5836)         | [459] |
|                      |                               | Human protein | 17.3 µM         |                                                                                               |                                            | Vero E6                                   | BetaCoV/Netherlands/01/ NL/2020 (#010V-03903)                 |                                     | [459] |

|                                                                |                    |         |                      |                                                                                                                |                                                |                               |                                                                              |                       |       |
|----------------------------------------------------------------|--------------------|---------|----------------------|----------------------------------------------------------------------------------------------------------------|------------------------------------------------|-------------------------------|------------------------------------------------------------------------------|-----------------------|-------|
|                                                                | E-64d              | Small   |                      |                                                                                                                |                                                | 293T and Vero                 | hCoV-19/Germany/FI1103201/2020                                               | Preclinical           | [449] |
| <b>Cathepsin L</b>                                             | SM141              | Small   |                      | 8.2±0.9 nM                                                                                                     |                                                | A549-hACE2                    |                                                                              | Preclinical           | [117] |
|                                                                | SM142              | Small   |                      | 14.7±2.2 nM                                                                                                    |                                                | A549-hACE2                    |                                                                              | Preclinical           | [117] |
|                                                                | Obatoclox          | Small   | < 1 µM               |                                                                                                                |                                                | HEK293T, Calu-3, Caco-2, A549 | SARS-CoV-2 S - pseudovirus(Wuhan-Hu-1)                                       | Preclinical           | [460] |
|                                                                | E-64d              | Small   |                      | 0.27 µM                                                                                                        |                                                | Vero E6                       | Wuhan-Hu-1                                                                   | Preclinical           | [461] |
|                                                                | Z-FY-CHO           | Small   | 5 µM                 | 0.62 µM                                                                                                        |                                                | Vero E6                       | Wuhan-Hu-1                                                                   | Preclinical           | [461] |
|                                                                | K777               | Small   |                      | 4 nM (Hela/ACE2), 7 nM (Calu-3/2B4), ≥ 70 nM (Vero E6), < 80 nM (A549/ACE2 cells), > 10 µM (Calu-3 ATCC cells) | >10µM (Vero E6), >10µM (Caco-2), Calu-3 > 20µM | Vero E6, Calu-3, HeLa/ACE2    | USA-WA1 / 2020                                                               | Preclinical           | [462] |
| <b>Furin</b>                                                   | Naphthofluorescein | Small   | 9.025 µM             |                                                                                                                | 57.44 µM                                       | Vero E6                       | hCoV-19/Taiwan/NTU03/2020                                                    | Preclinical           | [463] |
|                                                                | Decanoyl-RVKR-CMK  | Peptide | 0.057 µM             |                                                                                                                | 318.2 µM                                       | Vero E6                       | hCoV-19/Taiwan/NTU03/2020                                                    | Preclinical           | [463] |
| <b>PIKfyve kinase</b>                                          | Apilimod           | Small   |                      | 0.023 µM                                                                                                       |                                                | Vero E6                       | USA-WA1 / 2020                                                               | Phase 2 (NCT0444637)  | [464] |
|                                                                |                    |         | < 0.08 µM            |                                                                                                                |                                                | Vero E6                       | BetaCoV/France/IDF0372/2020                                                  |                       | [465] |
|                                                                |                    |         | 0.007 µM             |                                                                                                                |                                                | A549-ACE2                     | USA-WA1 / 2020                                                               |                       | [465] |
| <b>MAPK11/14 inhibitor</b>                                     | Ralimetinib        | Small   | 0.873 µM             |                                                                                                                |                                                | Vero E6                       | BetaCoV/France/IDF0372/2020                                                  | Preclinical           | [465] |
| <b>MAPK13 inhibitor</b>                                        | MAPK13-IN-1        | Small   | 4.63 µM              |                                                                                                                |                                                | Vero E6                       | BetaCoV/France/IDF0372/2020                                                  | Preclinical           | [465] |
| <b>MAPK14 inhibitor</b>                                        | ARRY-797           | Small   | 0.913 µM             |                                                                                                                |                                                | A549-ACE2                     | USA-WA1 / 2020                                                               | Preclinical           | [465] |
| <b>CDK</b>                                                     | Dinaciclib         | Small   | 0.127 µM<br>0.032 µM |                                                                                                                |                                                | Vero E6;<br>A549-ACE2         | BetaCoV/France/IDF0372/2020;<br>USA-WA1 / 2020                               | Preclinical           | [465] |
| <b>Glycogen synthase kinase 3 (GSK-3)</b>                      | CHIR99021          | Small   | ~5 µM                |                                                                                                                |                                                | Calu-3                        | SARS-CoV-2/human/USA/CA-CZB017/2020 (GenBank ID: MT385497.1)                 | Preclinical           | [466] |
|                                                                | Tideglusib         | Small   | 1.55± 0.30 µM        |                                                                                                                |                                                |                               |                                                                              | Preclinical           | [40]  |
| <b>HSP90</b>                                                   | 17-AAG             | Small   |                      |                                                                                                                | 50 µM                                          | Vero E6                       | SARS-CoV-2 (GenBank ID: MT230904)                                            | Preclinical           | [467] |
| <b>Transmembrane protein 16F (TMEM16F), Anoctamin 6 (ANO6)</b> | Nicosamide         | Small   | 0.34 µM              |                                                                                                                |                                                | Vero E6                       | SARS-CoV-2/England/IC19/2020 (IC19) SARS-CoV-2 strain England 02/2020/407073 | Phase 4 (NCT05087381) | [468] |
|                                                                | A6-001             | Small   | 0.97 µM              |                                                                                                                | >100µM                                         | Calu-3                        | SARS-CoV-2 (BetaCoV/korea/KUMC-2)                                            | Preclinical           | [469] |

|                                                            |                      |       |                              |                                |                                 |                                                |                                                          |                                              |       |
|------------------------------------------------------------|----------------------|-------|------------------------------|--------------------------------|---------------------------------|------------------------------------------------|----------------------------------------------------------|----------------------------------------------|-------|
| <b>Cyclophilin</b>                                         | Alisporivir          | Small | 2.3 $\mu$ M                  |                                |                                 | Primary human nasal epithelial cells           | SARS-CoV-2/Munich-1.1/2020/929                           | Phase 2 (NCT04608214)                        | [470] |
|                                                            | Cyclosporine A       | Small | 7.9 $\mu$ M                  |                                |                                 | Primary human nasal epithelial cells           | SARS-CoV-2/Munich-1.1/2020/929                           | Phase 4 (NCT04392531), Phase 3 (NCT04979884) | [470] |
| <b>Dihydroorotate dehydrogenase</b>                        | Leflunomide          | Small |                              | 41.49 $\pm$ 8.84 $\mu$ mol/L   | 879.00 $\pm$ 62.58 $\mu$ mol/L  | Vero E6 (MOI = 0.05)                           | BetaCoV/Wuhan/WIV04/2019                                 | Phase 3 (NCT05007678)                        | [471] |
|                                                            | S312                 | Small | 29.2 nmol/L                  | 1.59 $\pm$ 0.01 $\mu$ mol/L    | 158.20 $\pm$ 20.67 $\mu$ mol/L  | Vero E6 (MOI = 0.03)                           | BetaCoV/Wuhan/WIV04/2019                                 | Preclinical                                  | [471] |
|                                                            | S416                 | Small | 7.5 nmol/L                   | 0.014 $\pm$ 0.0001 $\mu$ mol/L | 178.60 $\pm$ 16.38 $\mu$ mol/L  | Vero E6 (MOI = 0.03)                           | BetaCoV/Wuhan/WIV04/2019                                 | Preclinical                                  | [471] |
|                                                            | Teriflunomide        | Small | 307.1 nmol/L                 | 6.00 $\pm$ 0.77 $\mu$ mol/L    | 850.50 $\pm$ 67.69 $\mu$ mol/L  | Vero E6 (MOI = 0.03)                           | BetaCoV/Wuhan/WIV04/2019                                 | Preclinical                                  | [471] |
|                                                            | Emvododstat (PTC299) | Small | 1.96 nM                      | 2.6 nM                         | >10 $\mu$ M                     | Vero E6                                        | USA-WA1 / 2020                                           | Phase 2/3 (NCT04439071)                      | [472] |
|                                                            | IMU-838              | Small | 160 nM                       | 7.6 $\pm$ 5.8 $\mu$ M          | >100 $\mu$ M                    | Vero E6                                        | SARS-CoV-2 (MUC-IMB-1/2020)                              | Phase 2 and Phase 3 (NCT04379271)            | [473] |
|                                                            | BAY-2402234          | Small |                              | 0.005 $\mu$ M                  | > 20 $\mu$ M                    | Calu-3                                         | USA-WA1 / 2020                                           | Preclinical                                  | [474] |
|                                                            | Brequinar            | Small |                              | 0.794 $\mu$ M                  | > 50 $\mu$ M                    | Calu-3                                         | USA-WA1 / 2020                                           | Phase 2 (NCT05166876, NCT04575038)           | [474] |
| <b>Uridine monophosphate synthetase</b>                    | Pyrazofurin          | Small |                              | 0.185 $\mu$ M                  | > 50 $\mu$ M                    | Calu-3                                         | USA-WA1 / 2020                                           | Preclinical                                  | [474] |
| <b>Equilibrative nucleoside transporters -1</b>            | Dipyridamole         | Small |                              | >50 $\mu$ M                    |                                 | A549/ACE2                                      | Beta(B.1.351)                                            | Preclinical                                  | [475] |
| <b>Eukaryotic translation elongation factor 1A (eEF1A)</b> | Plitidepsin          | Small | 0.7 nM<br>0.73 nM<br>1.62 nM |                                | 1.99 nM<br>> 200 nM<br>65.43 nM | Vero E6<br>hACE2-293T<br>Pneumocyte-like cells |                                                          | Phase 3 (NCT04784559)                        | [476] |
| <b>RAD51</b>                                               | B02                  | Small | 27.4 $\mu$ M                 | 8.81 $\mu$ M                   |                                 | Calu-3                                         | USA-WA1 / 2020                                           | Preclinical                                  | [477] |
|                                                            | Fluoxetine           | Small |                              | <1 $\mu$ M<br><1 $\mu$ M       | 41.97 $\mu$ M<br>40.16 $\mu$ M  | Calu-3<br>Vero E6                              | hCoV-19/Germany/FI1103201/2020 (EPI-ISL_463008)          | Phase 4 (NCT04377308)                        | [478] |
| <b>AKT1</b>                                                | MK-2206              | Small | 0.11 $\mu$ M                 |                                |                                 | Vero FM                                        | SARS-CoV-2 Munich/2020/984 (BetaCoV/Munich/BavPat1/2020) | Preclinical                                  | [479] |

|                                                                    |                              |                     |                              |               |                                             |                                       |                               |                                                |       |
|--------------------------------------------------------------------|------------------------------|---------------------|------------------------------|---------------|---------------------------------------------|---------------------------------------|-------------------------------|------------------------------------------------|-------|
| <b>CD147</b>                                                       | Meplazumab                   | Monoclonal Antibody |                              |               |                                             | Vero E6                               |                               | Phase 2 and Phase 3 (NCT04586153, NCT05113784) | [480] |
| <b>Bromodomain-containing protein 2</b>                            | ABBV-744                     | Small               | 4 to 18nM                    |               |                                             | Vero E6                               | BetaCoV/France/DF0372/2020    | Phase 1 (NCT03360006, NCT04454658)             | [481] |
| <b>Histamine H2-receptor</b>                                       | Famotidine                   | Small               | 2.3 to 0.2 $\mu$ M           |               |                                             | Vero E6 Caco2                         | SARS-CoV-2 FFM1               | Phase 4 (NCT04565392, NCT04836806)             | [482] |
| <b>Casein kinase 1<math>\alpha</math> (CK1<math>\alpha</math>)</b> | Lenalidomide                 | Small               | $\sim$ 168.1 $\mu$ M         |               |                                             | UMRC2 cells                           |                               | Phase 4 (NCT04361643)                          | [483] |
| <b>Casein Kinase 2 (CSNK2)</b>                                     | SGC-CK2-1                    | Small               | 0.21 $\mu$ M                 |               |                                             | Primary human airway epithelial cells | USA-WA1 / 2020                | Preclinical                                    | [484] |
| <b>AXL inhibitor</b>                                               | Gilteritinib                 | Small               | 0.807 $\mu$ M                |               |                                             | Vero E6                               | BetaCoV/France/DF0372/2020    | Preclinical                                    | [465] |
|                                                                    |                              |                     | 0.13 $\pm$ 0.05 $\mu$ M      |               |                                             | Vero E6                               | BetaCoV/France/DF0372/2020    | Preclinical                                    | [485] |
| <b>GFR pathway</b>                                                 | RO5126766                    | Small               | 0.6 $\mu$ M                  |               |                                             | CaCo-2                                | A clinical SARS-CoV-2 isolate | Preclinical                                    | [486] |
|                                                                    | Omipalisib                   | Small               | 0.014 $\mu$ M                |               |                                             | CaCo-2                                | A clinical SARS-CoV-2 isolate | Preclinical                                    | [486] |
|                                                                    | Sorafenib                    | Small               | 4.85 $\mu$ M                 |               |                                             | CaCo-2                                | A clinical SARS-CoV-2 isolate | Preclinical                                    | [486] |
|                                                                    | Pictilisib                   | Small               | 2.58 $\mu$ M                 |               |                                             | CaCo-2                                | A clinical SARS-CoV-2 isolate | Preclinical                                    | [486] |
|                                                                    | Lorafenib                    | Small               | 4.99 $\mu$ M                 |               |                                             | CaCo-2                                | A clinical SARS-CoV-2 isolate | Preclinical                                    | [486] |
|                                                                    |                              |                     |                              |               |                                             |                                       |                               |                                                |       |
| <b>Topical antitumor medication</b>                                | Ingenol                      | Small               |                              | 0.06 $\mu$ M  | > 20 $\mu$ M                                | Vero E6                               | USA_WA1/2020                  | Preclinical                                    | [487] |
| <b>Antiinflammatory, antineoplastic</b>                            | Cepharanthine                | Small               |                              | 1.41 $\mu$ M  | 11.22 $\mu$ M                               | Vero E6                               | USA_WA1/2020                  | Phase 2 NCT05398705)                           | [487] |
| <b>CDK</b>                                                         | Abemaciclib                  | Small               |                              | 3.16 $\mu$ M  | 7.08 $\mu$ M                                | Vero E6                               | USA_WA1/2020                  | Preclinical                                    | [487] |
| <b>EGFR</b>                                                        | Osimertinib                  | Small               |                              | 3.98 $\mu$ M  | 10.00 $\mu$ M                               | Vero E6                               | USA_WA1/2020                  | Preclinical                                    | [487] |
| <b>Tricyclic antidepressant</b>                                    | Trimipramine                 | Small               |                              | 20.52 $\mu$ M | > 20 $\mu$ M                                | Vero E6                               | USA_WA1/2020                  | Preclinical                                    | [487] |
| <b>ER stress response</b>                                          | Thapsigargin                 | Small               |                              | 260 nM        | MTT: 18.25 $\mu$ M, ATPlite : 20.27 $\mu$ M | Vero E6                               | SRX9907172                    | Preclinical                                    | [488] |
| <b>9-O-acetylated-sialic acids</b>                                 | 9-AcSA-porphyrin tetramer 11 | Macrocyclic agent   | 1 $\mu$ M                    |               |                                             | Vero E6                               | BavPat1 strain                | Preclinical                                    | [489] |
| <b>Carnitine palmitoyl transferase 1-a (CPT1a)</b>                 | ST1326                       | Small               | 0.86 $\mu$ M, 0.541 $\mu$ M  |               |                                             | Caco-2, HEK293T-ACE2                  | CHN/Beijing_IME-BJ01/2020     | Preclinical                                    | [490] |
| <b>Calmodulindependent protein kinase</b>                          | STO-609                      | Small               | 0.346 $\mu$ M, 50.43 $\mu$ M |               |                                             | Caco-2, HEK293T-ACE2                  | CHN/Beijing_IME-BJ01/2020     | Preclinical                                    | [490] |

|                                                                               |                      |           |                                        |                                                                                                                                                             |                                                        |                                                      |                                        |                                                |       |
|-------------------------------------------------------------------------------|----------------------|-----------|----------------------------------------|-------------------------------------------------------------------------------------------------------------------------------------------------------------|--------------------------------------------------------|------------------------------------------------------|----------------------------------------|------------------------------------------------|-------|
| <b>kinase (CaM-KK)</b>                                                        |                      |           |                                        |                                                                                                                                                             |                                                        |                                                      |                                        |                                                |       |
| <b>PGC1-<math>\alpha</math></b>                                               | Valproic acid        | Small     | 0.347 $\mu$ M,<br>3.035 $\mu$ M        |                                                                                                                                                             |                                                        | Caco-2,<br>HEK293T-<br>ACE2                          | CHN/Beijing_IME<br>-BJ01/2020          | Phase 4<br>NCT04513<br>314)                    | [490] |
| <b>Sec61</b>                                                                  | Apratoxin S4         | Small     | 0.17 $\mu$ M,<br>0.71 nM               |                                                                                                                                                             | >10<br>$\mu$ M,<br>>1 $\mu$ M                          | Vero E6,<br>HeLa-hACE2                               | USA_WA1/2020                           | Preclinical                                    | [491] |
| <b>Caspase-6</b>                                                              | z-VEID-fmk           | Small     | 3.3 $\mu$ M                            |                                                                                                                                                             |                                                        | Calu3                                                | HKU-001a                               | Preclinical                                    | [492] |
| <b>Vacuolar-ATPases</b>                                                       | Bafilomycin A1       | Macrolide | 9.6 nM;<br>5.6nM;<br>3.4nM;<br>1.8nM   |                                                                                                                                                             |                                                        | Vero-TMPRSS2<br>cells                                | WT;<br>D614G;<br>B.1.351;<br>B.1.1.529 | Preclinical                                    | [493] |
| <b>Proteasome machinery</b>                                                   | MG-132               | Small     | 0.32 $\mu$ M                           | 2.90 $\mu$ M                                                                                                                                                |                                                        | Vero E6 EGFP                                         | BetaCov/Belgium/<br>GHB-03021/2020     | Preclinical                                    | [494] |
| <b>Topoisomerase II</b>                                                       | Amrubicin            | Small     | 0.33 $\mu$ M                           | 33.00 $\mu$ M                                                                                                                                               |                                                        | Vero E6 EGFP                                         | BetaCov/Belgium/<br>GHB-03021/2020     | Preclinical                                    | [494] |
| <b>Dihydrofolate reductase</b>                                                | Trimetrexate         | Small     | 0.33 $\mu$ M                           | 1.99 $\mu$ M                                                                                                                                                |                                                        | Vero E6 EGFP                                         | BetaCov/Belgium/<br>GHB-03021/2020     | Preclinical                                    | [494] |
| <b>Sulfatase inhibitor</b>                                                    | Coumarin 7           | Small     | 0.36 $\mu$ M                           | 33.00 $\mu$ M                                                                                                                                               |                                                        | Vero E6 EGFP                                         | BetaCov/Belgium/<br>GHB-03021/2020     | Preclinical                                    | [494] |
| <b>SecA ATPase</b>                                                            | Fluorescein          | Small     | 0.67 $\mu$ M                           | 33.00 $\mu$ M                                                                                                                                               |                                                        | Vero E6 EGFP                                         | BetaCov/Belgium/<br>GHB-03021/2020     | Preclinical                                    | [494] |
| <b>Vacuolar-ATPases</b>                                                       | Rhodamine-123        | Small     | 0.80 $\mu$ M                           | 33.00 $\mu$ M                                                                                                                                               |                                                        | Vero E6 EGFP                                         | BetaCov/Belgium/<br>GHB-03021/2020     | Preclinical                                    | [494] |
| <b>Class III phosphoinositide 3-kinase (PI3K) vacuolar protein sorting 34</b> | VPS34-IN-1           | Small     | 0.40 $\mu$ M                           | 26.83 $\mu$ M                                                                                                                                               |                                                        | Vero E6 EGFP                                         | BetaCov/Belgium/<br>GHB-03021/2020     | Preclinical                                    | [494] |
|                                                                               | PIK-III              | Small     | 0.12 $\mu$ M                           |                                                                                                                                                             | >50<br>$\mu$ M                                         | Calu-3 cells                                         | USA/WA/1/2020                          | Preclinical                                    | [495] |
|                                                                               | Copanlisib           | Small     |                                        | > 20 $\mu$ M                                                                                                                                                | 5.74<br>$\mu$ M                                        | Vero E6                                              | USA_WA1/2020                           | Preclinical                                    | [487] |
|                                                                               |                      |           |                                        |                                                                                                                                                             |                                                        |                                                      |                                        |                                                |       |
| <b>Eukaryotic Translation Initiation Factor 2 Alpha Kinase 2 (EIF2AK2)</b>    | C16                  | Small     |                                        | 48H direct virus<br>Inhibition:<br>0.568 $\mu$ M,<br>1.65 $\mu$ M,<br>1.25 $\mu$ M<br><br>72H CPE assays:<br>1.06 $\mu$ M,<br>2.06 $\mu$ M,<br>2.96 $\mu$ M | 11.1 $\mu$ M<br>,<br>14.4 $\mu$ M<br>,<br>26.2 $\mu$ M | VeroE6,<br>VeroE6+TMPR<br>SS2,<br>A549+ACE2          | ?                                      | Preclinical                                    | [496] |
| <b>Farnesoid X receptor</b>                                                   | Ursodeoxycholic acid | Small     |                                        |                                                                                                                                                             |                                                        |                                                      |                                        | Preclinical                                    | [497] |
| ?                                                                             | Cannabidiol          | Small     |                                        | 0.63 $\mu$ M<br>4.96 $\mu$ M<br>1.75 $\mu$ M                                                                                                                |                                                        | A549-ACE<br>Vero E6<br>Calu-3                        | USA_WA1/2020                           | Phase 2/3<br>(NCT04467<br>918,NCT04<br>504877) | [498] |
| ?                                                                             | Clofoctol            | Small     |                                        | Vero-81: 9.3 $\mu$ M,<br>Vero-81-<br>TMPRSS2: 11.59<br>$\mu$ M                                                                                              |                                                        | Vero-81, Vero-<br>81-TMPRSS2                         | BetaCoV/France/I<br>DF0372/2020        | Preclinical                                    | [499] |
| ?                                                                             | JIB-04               | Small     |                                        | 695 nM                                                                                                                                                      | >1000 $\mu$<br>M                                       | Vero E6                                              | Wild-type                              | Preclinical                                    | [500] |
| ?                                                                             | Lactoferrin          | Small     | 308 nM<br>1170 nM                      |                                                                                                                                                             |                                                        | Huh-7,<br>Caco-2                                     | USA-WA1/2020                           | Phase 2/3<br>( NCT0442<br>1534)                | [501] |
| <b>Ataxia-telangiectasia and Rad3</b>                                         | Berzosertib          | Small     | Calu-3:<br>0.48 $\mu$ M,<br>A549-ACE2: |                                                                                                                                                             |                                                        | HeLa-<br>ACE2:<br>Calu-3,<br>A549-ACE2,<br>HeLa-ACE2 | USA-WA1/2020                           | Preclinical                                    | [502] |

|                                                                                       |              |       |                                                                                     |                                 |                            |                    |                                              |                       |       |
|---------------------------------------------------------------------------------------|--------------|-------|-------------------------------------------------------------------------------------|---------------------------------|----------------------------|--------------------|----------------------------------------------|-----------------------|-------|
| related (ATR) kinase                                                                  |              |       | 0.24 $\mu$ M                                                                        |                                 | 3.89 $\mu$ M               |                    |                                              |                       |       |
| Complement protein C3                                                                 | AMY-101      |       |                                                                                     |                                 |                            |                    |                                              | Phase 2 (NCT04395456) | [503] |
| Glucosylceramide synthase                                                             | GZ-161       | Small | 2.5 $\mu$ M                                                                         |                                 | 47.98 $\mu$ M              | Vero E6            | SARS-CoV-2 (GISAID accession EPI_ISL_406862) | Preclinical           | [504] |
|                                                                                       | GZ-346       | Small | 2.7 $\mu$ M                                                                         |                                 | 46.04 $\mu$ M              | Vero E6            | SARS-CoV-2 (GISAID accession EPI_ISL_406862) | Preclinical           | [504] |
| Heparanase enzyme                                                                     | Roneparstat  | Small | 0.07 $\mu$ g/mL                                                                     |                                 |                            | Vero E6            | SARS-CoV-2 (USA-WA1/2020)                    | Preclinical           | [505] |
|                                                                                       | Lenalidomide |       |                                                                                     |                                 |                            |                    |                                              | Phase 4 (NCT04421534) | [505] |
| Nucleotide-binding oligomerization domain-containing protein 2 (NOD2)                 | GSK717       | Small | 10.22 to 14.38 $\mu$ M                                                              |                                 | 75.30 $\mu$ M              | ACE2-SK-N-SH cells | SARS-CoV-2 (SARS-CoV-2/CANADA/VIDO 01/2020)  | Preclinical           | [506] |
| Methylenetetrahydrofolate dehydrogenase 1 (MTHFD1)                                    | Carolacton   | Small | 0.14 $\mu$ M<br>0.05 $\mu$ M                                                        |                                 | >16 $\mu$ M                | Vero E6,<br>Calu3  |                                              | Preclinical           | [507] |
| Carbamoyl phosphate synthetase, aspartate transcarbamoylase, and dihydroorotase (CAD) | 2-TCPA       | Small | 2.36 $\mu$ M,<br>11.61 $\mu$ M                                                      |                                 | >64 $\mu$ M<br>>64 $\mu$ M | Caco-2,<br>Calu-3  | USA-WA1/2020                                 | Preclinical           | [508] |
| Cyclin-dependent kinase 2 (CDK2)                                                      | SNS-032      | Small |                                                                                     | 0.073 $\mu$ M,<br>87 $\mu$ M    |                            | HEK293T,<br>Vero   |                                              | Preclinical           | [509] |
| Poly(ADP-ribose) polymerase (PARP)                                                    | Stenoparib   | Small |                                                                                     | 25.5 $\mu$ M                    |                            | LLC-MK2            | USA-WA1/2020                                 | Preclinical           | [510] |
| Protein arginine methyltransferases                                                   | GSK3326595   | Small |                                                                                     |                                 |                            | HEK-293T           | WT,<br>Omicron,<br>Delta,<br>Beta            | Preclinical           | [511] |
| Ubiquitin-specific peptidase 25 (USP25)                                               | AZ1          | Small |                                                                                     | 0.846 $\mu$ M,<br>0.145 $\mu$ M |                            | HEK293,<br>Vero E6 | Wuhan-Hu-1                                   | Preclinical           | [512] |
| $\alpha$ -glucosidase                                                                 | UV-4         | Small | $\alpha$ -glucosidase I: 0.5371 $\mu$ M<br>$\alpha$ -glucosidase II: 0.0685 $\mu$ M | 3.32 $\mu$ M                    | >100 $\mu$ M               | ACE2-A549 cells    | USA-WA1/2020                                 | Preclinical           | [513] |

**Table S4: Repurposed drugs with limited clinical benefits for COVID-19 patients**

| Repurposed drugs    | Original indications                                 | COVID-19 severity                                                                                           | Country              | Treatment vs control                                                                                                                                                              | Patients in treated vs control | Major findings                                                                                                                | Conclusion    | Study                                     | Phase (trial ID)     | Ref.  |
|---------------------|------------------------------------------------------|-------------------------------------------------------------------------------------------------------------|----------------------|-----------------------------------------------------------------------------------------------------------------------------------------------------------------------------------|--------------------------------|-------------------------------------------------------------------------------------------------------------------------------|---------------|-------------------------------------------|----------------------|-------|
| <b>Aspirin</b>      | Antithrombotic therapy                               | Hospitalized patients with COVID-19                                                                         | UK, Nepal, Indonesia | Usual standard of care plus aspirin 150 mg by mouth (or nasogastric tube) or by rectum every day until discharge vs usual standard of care alone                                  | 7351 vs 7541                   | Aspirin was not associated with reductions in 28-day mortality.                                                               | Not effective | A randomized controlled trial             | 2, 3                 | [514] |
| <b>Atorvastatin</b> | Statin medication to prevent cardiovascular disease  | COVID-19 adults in ICU                                                                                      | Iran                 | Atorvastatin 20 mg orally once daily versus placebo                                                                                                                               | 215 vs 229                     | Atorvastatin did not reduce all-cause mortality, venous/arterial thrombosis.                                                  | Not effective | A randomized controlled trial             | 3                    | [515] |
| <b>Azithromycin</b> | Infections caused by bacteria, (Antirheumatic drugs) | Patients with suspected COVID-19 within 14 days of symptom onset, and at an increased risk of complications | UK                   | Usual care plus azithromycin 500 mg daily for three days vs usual care alone vs other interventions                                                                               | 500 vs 823 vs 797              | Azithromycin plus usual care did not shorten the time to first self-reported recovery or decrease the risk of hospitalization | Not effective | A randomized controlled trial             | 3 (ISRCT N8653 4580) | [516] |
|                     |                                                      | In-patients with severe COVID-19                                                                            | Brazil               | Hydroxychloroquine [400 mg 2x/day, 12/12 h] + azithromycin [500 mg 1x/day] for 10 days plus standard of care Vs hydroxychloroquine [400 mg 2x/day, 12/12 h] plus standard of care | 214 vs 183                     | Adding azithromycin to standard of care treatment (which included hydroxychloroquine) did not improve clinical outcomes.      | Not effective | A randomized controlled trial             | 3                    | [517] |
|                     |                                                      | Outpatients with mild-to-moderate COVID-19                                                                  | UK                   | Azithromycin 500 mg OD PO 14 days plus standard care vs standard care alone                                                                                                       | 145 vs 147                     | Azithromycin plus standard care did not reduce the risk of subsequent hospital admission or death.                            | Not effective | Prospective, open-label, randomized trial | 3                    | [518] |
|                     |                                                      | Symptomatic outpatients with COVID-19                                                                       | USA                  | Single oral 1.2-g dose of azithromycin vs placebo                                                                                                                                 | 171 vs 92                      | Treatment with a single dose of azithromycin did not result in greater likelihood                                             | Not effective | A randomized controlled trial             | 3                    | [519] |

|                                     |                                                                                                                                 |                                                                                            |             |                                                                                                                                                   |            |                                                                                                                                                                     |               |                                                                                 |   |       |
|-------------------------------------|---------------------------------------------------------------------------------------------------------------------------------|--------------------------------------------------------------------------------------------|-------------|---------------------------------------------------------------------------------------------------------------------------------------------------|------------|---------------------------------------------------------------------------------------------------------------------------------------------------------------------|---------------|---------------------------------------------------------------------------------|---|-------|
|                                     |                                                                                                                                 |                                                                                            |             |                                                                                                                                                   |            | of being symptom free at day 14.                                                                                                                                    |               |                                                                                 |   |       |
| <b>Allogeneic mesenchymal cells</b> | An immunomodulatory agent                                                                                                       | Mechanically ventilated patients with moderate or severe COVID-induced respiratory failure | USA         | Two infusions of 2 million cells/kg versus sham infusions                                                                                         | 112 vs 110 | Mesenchymal cells did not improve 30-day survival or 60-day ventilator-free days in patients with moderate/severe COVID-related acute respiratory distress syndrome | Not effective | Randomized, double blind, parallel design, placebo controlled trial             | 3 | [520] |
| <b>Canakinumab</b>                  | Cryopyrin-Associated Periodic Syndromes (CAPS), Familial Cold Auto-inflammatory Syndrome (FCAS), Moersch-Woltman Syndrome (MWS) | Hospitalized patients with severe COVID-19                                                 | USA, Europe | Canakinumab 450 mg for body weight of 40-60 kg, 600 mg for 60-80 kg, and 750 mg for >80 kg) vs placebo                                            | 227 vs 227 | Treatment with canakinumab did not significantly increase the likelihood of survival without IMV at day 29                                                          | Not effective | A randomized controlled trial                                                   | 3 | [521] |
| <b>Camostat mesylate</b>            | A TMPRSS2 inhibitor                                                                                                             | Adult Patients with Mild to Moderate COVID-19                                              | Japan       | Camostat (600 mg qid) versus placebo                                                                                                              | 78 vs 77   | Camostat mesilate did not substantially reduce the time to viral clearance                                                                                          | Not effective | Multicenter, double-blind, randomized, parallel-group, placebo-controlled trial | 3 | [522] |
|                                     |                                                                                                                                 | Patients with mild-to-moderate COVID-19                                                    | South Korea | Camostat mesylate (orally at 200 mg three times a day for 14 days) versus placebo                                                                 | 172 vs 170 | Camostat mesylate did not show clinical benefit in patients with mild to moderate COVID-19.                                                                         | Not effective | A double-blind, randomized, placebo-controlled, clinical study                  | 2 | [523] |
| <b>Ciclesonide</b>                  | Asthma, allergic rhinitis                                                                                                       | Outpatients with symptomatic COVID-19                                                      | USA         | Ciclesonide metered-dose inhaler 160 µg per actuation, for a total of 2 actuations twice a day (total daily dose, 640 µg) or placebo for 30 days. | 197 vs 203 | ciclesonide did not reduce time to alleviation of all COVID-19-related symptoms.                                                                                    | Not effective | A phase 3, multicenter, double-blind, randomized clinical trial                 | 3 | [524] |
|                                     |                                                                                                                                 | Symptomatic outpatients with COVID-19                                                      | Canada      | Inhaled ciclesonide (600 µg twice daily), intranasal ciclesonide (200 µg daily)                                                                   | 105 vs 98  | Inhaled and intranasal ciclesonide did not improve the resolution of COVID-19 symptoms among younger adults                                                         | Not effective | A randomized, double blind, placebo-controlled trial                            | 2 | [525] |



|                            |                                                                                    |                                                                                |                                                     |                                                                                                                                                                                                     |              |                                                                                                                                                                                                         |               |                                                                             |                 |       |
|----------------------------|------------------------------------------------------------------------------------|--------------------------------------------------------------------------------|-----------------------------------------------------|-----------------------------------------------------------------------------------------------------------------------------------------------------------------------------------------------------|--------------|---------------------------------------------------------------------------------------------------------------------------------------------------------------------------------------------------------|---------------|-----------------------------------------------------------------------------|-----------------|-------|
| <b>Colchicine</b>          | Acute gout and pericarditis                                                        | Hospitalized patients with COVID-19                                            | UK, Indonesia, Nepal                                | Usual standard of care plus colchicine: colchicine 1 mg followed by 500 µg 12 h later and then 500 µg twice a day by mouth or nasogastric tube for 10 days in total vs Usual standard of care alone | 5610 vs 5730 | In adults hospitalized with COVID-19, colchicine was not associated with reductions in 28-day mortality, duration of hospital stay, or risk of progressing to invasive mechanical ventilation or death. | Not effective | A randomized controlled trial                                               | 2, 3            | [526] |
| <b>Dapagliflozin</b>       | Type 2 diabetes, heart failure, chronic kidney disease                             | COVID-19 inpatients with at least one cardiometabolic risk factor              | Argentina, Brazil, Canada, India, Mexico, UK, USA   | Patients were treated with either dapagliflozin 10 mg once daily orally or matching placebo for 30 days                                                                                             | 625 vs 625   | Dapagliflozin did not result in a significant risk reduction in organ dysfunction, death, improvement in clinical recovery.                                                                             | Not effective | Randomized, double-blind, placebo-controlled trial                          | 3               | [527] |
| <b>Gimsilumab</b>          | Anti-Granulocyte-macrophage colony-stimulating factor (GM-CSF) monoclonal antibody | COVID-19 inpatients with elevated inflammatory markers and hypoxemia (BREATHE) | USA                                                 | Gimsilumab 400 mg on Day 1, Gimsilumab 200 mg on Day 8 versus normal saline on day 1, Normal saline on Day 8                                                                                        | 114 vs 113   | Gimsilumab did not improve mortality or other key clinical outcomes in patients with COVID-19 pneumonia and evidence of systemic inflammation.                                                          | Not effective | Multi-center, adaptive, double-blind, A randomized controlled trial         | 2               | [528] |
| <b>Otilimab</b>            | Anti-GM-CSF monoclonal antibody                                                    | Hospitalized adults with severe COVID-19                                       | Many countries                                      | Otilimab 90 mg versus standard care                                                                                                                                                                 | 175 vs 175   | Otilimab showed no significant benefit in the proportion of patients alive and free of respiratory failure at Day 28.                                                                                   | Not effective | Randomised, sequential, multicentre, placebo controlled, double-blind study | 2 (NCT04376684) | [529] |
| <b>Fluticasone furoate</b> | A corticosteroid for the treatment of non-allergic and allergic rhinitis           | Outpatients with mild-to-moderate COVID-19                                     | USA                                                 | Inhaled fluticasone furoate 200 µg once daily for 14 days versus placebo                                                                                                                            | 656 vs 621   | Inhaled fluticasone furoate for 14 days did not result in improved time to recovery among outpatients with COVID-19                                                                                     | Not effective | Decentralized, placebo-controlled, randomized, platform trial               | 3 (ACT1 V-6)    | [530] |
| <b>Interferon beta-1a</b>  | Multiple Sclerosis                                                                 | Hospitalized adult patients with COVID-19                                      | Japan, Mexico, Singapore, South Korea, and the USA. | Interferon beta-1a, 44 mcg on Days 1, 3, 5, and 7; Remdesivir, 200 mg on Day 1, followed by a 100 mg maintenance dose daily for up to 9 days.                                                       | 487 vs 482   | Interferon beta-1a plus remdesivir was not superior to remdesivir alone in hospitalized patients with COVID-19 pneumonia.                                                                               | Not effective | A randomized controlled trial                                               | 3               | [531] |

|                                |                                                                                 |                                                                             |             |                                                                                                          |            |                                                                                                                                                                                         |               |                                                                            |                          |       |
|--------------------------------|---------------------------------------------------------------------------------|-----------------------------------------------------------------------------|-------------|----------------------------------------------------------------------------------------------------------|------------|-----------------------------------------------------------------------------------------------------------------------------------------------------------------------------------------|---------------|----------------------------------------------------------------------------|--------------------------|-------|
|                                |                                                                                 |                                                                             |             | vs Placebo                                                                                               |            |                                                                                                                                                                                         |               |                                                                            |                          |       |
| <b>Peginterferon lambda-1a</b> | Chronic viral hepatitis                                                         | Outpatients with mild to moderate COVID-19                                  | USA         | Peginterferon Lambda-1a (180 µg subcutaneous injection) with Standard of Care vs Standard of Care        | 60 vs 60   | A single dose of subcutaneous Peginterferon Lambda-1a didn't improve symptoms in outpatients with uncomplicated COVID-19.                                                               | Not effective | A randomized controlled trial                                              | 2                        | [532] |
| <b>Imatinib</b>                | Chronic myelogenous leukemia and malignant gastrointestinal interstitial tumors | Hospitalised patients with severe COVID-19                                  | Netherlands | Oral imatinib given as a loading dose of 800 mg on day 0 followed by 400 mg daily on days 1-9 vs placebo | 197 vs 188 | Imatinib did not reduce the time to discontinuation of ventilation and supplemental O <sub>2</sub> for more than 2 successive days in patients with COVID-19 requiring O <sub>2</sub> . | Not effective | A randomized, double-blind, placebo-controlled, clinical trial             | EudraCT 2020-001236-10   | [533] |
| <b>Ivermectin</b>              | Parasitic diseases                                                              | Symptomatic patients with mild COVID-19                                     | Colombia    | Ivermectin, 300 µg/kg, once daily for 5 days vs placebo                                                  | 200 vs 198 | A 5-day course of Ivermectin did not significantly improve the time to resolution of symptoms.                                                                                          | Not effective | A randomized controlled trial                                              | 2, 3                     | [534] |
|                                |                                                                                 | Nonhospitalized adults enrolled ≤3 days after a confirmed diagnosis ≤7 days | USA         | Ivermectin versus control                                                                                | 663 vs 660 | It did not prevent the occurrence of hypoxemia, an emergency department visit, hospitalization, or death associated with Covid-19.                                                      | Not effective | Double-blind, randomized, placebo-controlled trial                         | 3 (COVID-OUT)            | [535] |
|                                |                                                                                 | Outpatients with early mild to moderate COVID-19                            | USA         | Ivermectin versus control                                                                                | 817 vs 774 | Among outpatients with mild to moderate COVID-19, treatment with ivermectin, compared with placebo, did not significantly improve time to recovery.                                     | Not effective | Decentralized, double-blind, randomized, placebo controlled platform trial | 3 (ACTIV-6, NCT04885530) | [536] |
|                                |                                                                                 | Acutely symptomatic outpatients with COVID-19                               | Brazil      | Ivermectin 400 µg/kg once daily for 3 days vs placebo                                                    | 679 vs 679 | Ivermectin did not result in a lower incidence of hospitalization.                                                                                                                      | Not effective | A double blind, adaptive, randomized controlled trial                      | 3                        | [537] |
| <b>Nicotine</b>                | Parkinson's disease                                                             | Critically ill COVID-19 inpatients on mechanical ventilation                | France      | Transdermal patches containing nicotine at a daily dose of 14 mg vs placebo                              | 106 vs 102 | Nicotine did not significantly reduce day-28 mortality.                                                                                                                                 | Not effective | A randomized, double-blind, placebo-controlled, multicentre trial          | 3 (NCT04598594)          | [538] |

|                                                                   |                                                |                                                                                             |                                      |                                                                                                                                                                                                                                                                                  |                                                                                                                        |                                                                                                                                 |               |                                                               |                           |       |
|-------------------------------------------------------------------|------------------------------------------------|---------------------------------------------------------------------------------------------|--------------------------------------|----------------------------------------------------------------------------------------------------------------------------------------------------------------------------------------------------------------------------------------------------------------------------------|------------------------------------------------------------------------------------------------------------------------|---------------------------------------------------------------------------------------------------------------------------------|---------------|---------------------------------------------------------------|---------------------------|-------|
| <b>Nitazoxanide</b>                                               | Diarrhea caused by certain parasite infections | Symptomatic patients with mild COVID-19                                                     | Brazil                               | Nitazoxanide 500 mg vs Placebo TID for 5 days                                                                                                                                                                                                                                    | 194 vs 198                                                                                                             | Symptom resolution was similar between nitazoxanide and placebo groups after 5-day therapy.                                     | Not effective | A randomized controlled trial                                 | 2 (SARITA-2, NCT04552483) | [539] |
| <b>N-acetylcysteine</b>                                           | Mucolytic therapy and acetaminophen overdose   | Inpatients with severe COVID-19 (confirmed or suspected)                                    | Brazil                               | Acetylcysteine 21 g (~300 mg/kg) for 20 hours vs Dextrose 5%                                                                                                                                                                                                                     | 67 vs 68                                                                                                               | N-acetylcysteine high doses did not affect the evolution of severe COVID-19.                                                    | Not effective | A randomized controlled trial                                 | Not applicable            | [540] |
| <b>Pirfenidone</b>                                                | Interstitial fibrosis                          | Hospitalized adults with severe COVID-19                                                    | China                                | Pirfenidone treatment vs standard treatment alone                                                                                                                                                                                                                                | 73 vs 73                                                                                                               | Pirfenidone has not been found to improve the interstitial changes in severe COVID-19 patients.                                 | Not effective | A randomized, open-label trial                                | 3                         | [541] |
| <b>Remdesivir, Hydroxychloroquine, Lopinavir, Interferon β-1a</b> |                                                | Inpatients with COVID-19                                                                    | 405 hospitals in 30 WHO countries    | Remdesivir, 200 mg (day 0), 100 mg/d (day 2 to 9), Hydroxychloroquine sulfate (200 mg, 4 tablets at hours 0 and 6, twice/d, starting at hour 12, for 10 days), Lopinavir 200mg/ritonavir 50mg, twice/d for 14 d, Interferon β-1a, 44 mcg/d (day 0, 3, 6) or IV, 10 mcg/d for 6 d | Remdesivir: 2750 vs 2725<br>Hydroxychloroquine: 954 vs 909<br>Lopinavir: 1411 vs 1380<br>Interferon β-1a: 2063 vs 2064 | No significant benefit of remdesivir, hydroxychloroquine, lopinavir, or interferon β-1a in patients hospitalized with COVID-19. | Not effective | The multinational randomized controlled trial                 | 3                         | [542] |
| <b>Ruxolitinib</b>                                                | JAK1/JAK2 inhibitor                            | Adults who were hospitalized but not on mechanical ventilation or in an intensive care unit | Many countries                       | Oral ruxolitinib 5 mg twice per day versus placebo for 14 days                                                                                                                                                                                                                   | 287 vs 145                                                                                                             | Ruxolitinib 5 mg twice per day showed no benefit in the overall study population                                                | Not effective | A randomized, double-blind, placebo-controlled trial          | 3                         | [543] |
| <b>Astegolimab, Efmardocokin alfa</b>                             | IL-33 antagonists                              | Hospitalized adults with severe COVID-19 pneumonia                                          | United States, Brazil, Mexico, Spain | Astegolimab 700/350 mg IV + SOC; Efmardocokin alfa 90 µg/kg IV + SOC; versus placebo                                                                                                                                                                                             | 130 vs 132 vs 134                                                                                                      | Treatment with astegolimab or efmardocokin alfa did not improve time to recovery in patients with severe COVID-19 pneumonia.    | Not effective | Double-blind, placebo controlled study (COVID-astegolimab-IL) | 2                         | [544] |

|                                                               |                                                                       |                                                                                        |         |                                                                                                                                                                            |                                                                                           |                                                                                                                                          |               |                                                                      |                                        |       |
|---------------------------------------------------------------|-----------------------------------------------------------------------|----------------------------------------------------------------------------------------|---------|----------------------------------------------------------------------------------------------------------------------------------------------------------------------------|-------------------------------------------------------------------------------------------|------------------------------------------------------------------------------------------------------------------------------------------|---------------|----------------------------------------------------------------------|----------------------------------------|-------|
| <b>Siltuximab</b>                                             | IL6 antagonist for multicentric Castleman's disease                   | Hospitalised patients with COVID-19, hypoxia, and signs of a cytokine release syndrome | Belgium | Interleukin (IL)-1 blockade vs no IL-1 blockade; IL-6 blockade vs no IL-6 blockade                                                                                         | IL-1: 112 vs placebo 230<br>IL-6: 227 (114 for tocilizumab and 113 for siltuximab) vs 115 | The benefits of siltuximab in a patient population with moderate 28-day mortality were not detected.                                     | Not effective | A prospective, multicentre, open-label, randomised, controlled trial | 3                                      | [545] |
| <b>Sofosbuvir (SOF)+ Velpatasvir (VEL)</b>                    | Hepatitis C virus                                                     | Inpatients with moderate to severe COVID-19                                            | Iran    | Sofosbuvir 400 mg and velpatasvir 100 mg plus national standard of care (including hydroxychloroquine 400 mg and lopinavir/ritonavir 100 to 400 mg) vs standard care alone | 40 vs 40                                                                                  | Adding SOF/VEL to the standard of care did not improve clinical status or reduce mortality in patients with moderate to severe COVID-19. | Not effective | A randomised controlled trial                                        | 3                                      | [546] |
| <b>Sofosbuvir+ daclatasvir</b>                                | Hepatitis C virus                                                     | Hospitalized patients with COVID-19                                                    | Iran    | hospitalized patients with COVID-19                                                                                                                                        | 541 vs 542                                                                                | Sofosbuvir/daclatasvir versus placebo did not reduce hospital discharge or survival in hospitalized patients with COVID-19.              | Not effective | A randomized double-blind clinical trial (DISCOVER)                  | 3                                      | [547] |
|                                                               |                                                                       | Outpatients with mild COVID-19                                                         | Iran    | Sofosbuvir/daclatasvir plus hydroxychloroquine or a control arm receiving hydroxychloroquine alone.                                                                        | 27 vs 28                                                                                  | Sofosbuvir/daclatasvir did not significantly alleviate symptoms after 7 days of treatment compared with control.                         | Not effective | A double-blind, randomized controlled trial                          | NA                                     | [548] |
| <b>Tenofovir disoproxil fumarate/Emt ricitabine (TDF/FTC)</b> | Human immunodeficiency virus-reverse transcriptase (HIV-RT) inhibitor | COVID-19 adults with high risk for severe COVID-19                                     | Spain   | TDF/FTC versus no TDF/FTC                                                                                                                                                  | 177 vs 178                                                                                | TDF/FTC did not improve 28-day mortality relative risk.                                                                                  | Not effective | An open-label, double-randomized, phase 3 pragmatic trial            | 3 (PANC OVID, EudraCT: 2020-001156-18) | [549] |
|                                                               |                                                                       | Healthcare workers with negative SARS-CoV-2 IgM/IgG test                               | Spain   | TDF/FTC (N=233), HCQ (N=231), TDF/FTC+HCQ (N=220), Placebo (N=223)                                                                                                         | 233 vs 231 vs 220 vs 223                                                                  | TDF/FTC and HCQ, alone or in combination, compared with placebo, showed comparable effects for pre-exposure prophylaxis of               | Not effective | A double-blind placebo-controlled randomized trial                   | 3 (NCT04334928)                        | [550] |

|                                                 |                                             |                                                                             |                           |                                                                                                     |                      |                                                                                                                                                                                |               |                                                                 |                  |       |
|-------------------------------------------------|---------------------------------------------|-----------------------------------------------------------------------------|---------------------------|-----------------------------------------------------------------------------------------------------|----------------------|--------------------------------------------------------------------------------------------------------------------------------------------------------------------------------|---------------|-----------------------------------------------------------------|------------------|-------|
|                                                 |                                             |                                                                             |                           |                                                                                                     |                      | COVID-19                                                                                                                                                                       |               |                                                                 |                  |       |
| <b>Ticagrelor, clopidogrel</b>                  | P2Y12 inhibitors                            | Non-critically ill inpatients with COVID-19                                 | Brazil, Italy, Spain, USA | Heparin plus a P2Y12 inhibitor (ticagrelor 63%, clopidogrel 37%) or standard heparin only (n = 269) | 293 vs 269           | Compared with heparin alone, P2Y12 inhibitor plus heparin did not result in an increased odds of improvement in organ support-free days within 21 days during hospitalization. | Not effective | An open-label, Bayesian, adaptive randomized clinical trial     | 4 (NCT04505774)  | [551] |
| <b>Vitamin D3 (cholecalciferol)</b>             | Supplementation                             | Inpatients with moderate or severe COVID-19                                 | Brazil                    | A single high dose of vitamin D3 versus placebo                                                     | 120 vs 120           | High dose vitamin D3 did not significantly reduce hospital length of stay.                                                                                                     | Not effective | Multicenter, double-blind, randomized, placebo controlled trial | NCT0449718       | [552] |
| <b>Zinc gluconate, ascorbic acid(vitamin C)</b> | Supplementation                             | Outpatient with COVID-19                                                    | USA                       | Zinc, ascorbic acid, zinc plus ascorbic acid, control                                               | 58 vs 48 vs 58 vs 50 | High-dose zinc gluconate, ascorbic acid, or their combination did not significantly decrease the duration of COVID-19 symptoms.                                                | Not effective | Randomized, open-label, trial                                   | NCT04342728      | [553] |
| <b>Vitamin C</b>                                | Supplementation                             | Patients with mild-to-moderate COVID-19                                     | USA                       | Placebo (n = 34), vitamin C 1000 mg (n = 32), or melatonin 10 mg (n = 32)                           | 34 vs 32 vs 32       | Vitamin C 1000 mg once daily has no effect on disease progression.                                                                                                             | Not effective | A randomized, double-blind, placebo-controlled trial            | NCT04530539      | [554] |
|                                                 |                                             |                                                                             |                           |                                                                                                     |                      |                                                                                                                                                                                |               |                                                                 |                  |       |
| <b>Metformin</b>                                | A first-line agent to treat type 2 diabetes | Nonhospitalized adults enrolled ≤3 days after a confirmed diagnosis ≤7 days | USA                       | Metformin versus control                                                                            | 663 vs 660           | It did not prevent the occurrence of hypoxemia, an emergency department visit, hospitalization, or death associated with COVID-19.                                             | Not effective | Double-blind, randomized, placebo-controlled trial              | 3 (COVID-OUT)    | [535] |
| <b>Fluvoxamine</b>                              | An antidepressant                           | Nonhospitalized adults enrolled ≤3 days after a confirmed diagnosis ≤7 days | USA                       | Fluvoxamine versus control                                                                          | 334 vs 327           | It did not prevent the occurrence of hypoxemia, an emergency department visit, hospitalization, or death associated with COVID-19.                                             | Not effective | Double-blind, randomized, placebo-controlled trial              | 3 (COVID-OUT)    | [535] |
| <b>Ensovibep (MP0420)</b>                       | A designed ankyrin repeat protein           | Hospitalized adults with COVID-19                                           | USA                       | Ensovibep versus placebo                                                                            | 247 vs 238           | Ensovibep did not improve clinical outcomes for hospitalized participants receiving standard care                                                                              | Not effective | Double-blind, randomized, placebo-controlled trial              | 3 (ACTIV-3/TICO) | [555] |
| <b>Telmisartan</b>                              | Angiotensin receptor blockers               | Inpatients with wild COVID-19                                               | India, Australia          | Angiotensin receptor blockers                                                                       | 388 vs 394           | No evidence of benefit was found                                                                                                                                               | Not effective | A pragmatic,                                                    | 3 (NCT0439411)   | [556] |

|                                           |                                                                                                                    |                                                                                                     |         |                                                                                                                                            |               |                                                                                                                                                                                      |               |                                                                |                       |       |
|-------------------------------------------|--------------------------------------------------------------------------------------------------------------------|-----------------------------------------------------------------------------------------------------|---------|--------------------------------------------------------------------------------------------------------------------------------------------|---------------|--------------------------------------------------------------------------------------------------------------------------------------------------------------------------------------|---------------|----------------------------------------------------------------|-----------------------|-------|
|                                           |                                                                                                                    |                                                                                                     |         | (Telmisartan) versus control                                                                                                               |               | for treatment with angiotensin receptor blockers, using predominantly 40 mg/day of telmisartan                                                                                       |               | adaptive, multicentre, phase 3, randomised controlled trial    | 7)                    |       |
| <b>Aviptadil acetate</b>                  | A vasoactive intestinal polypeptide binds to alveolar type 2 cells in lungs to inhibit pro-inflammatory cytokines. | 196 inpatients with COVID-19 respiratory failure.                                                   | USA     | Three 12-hour IV infusions of Aviptadil at graduating doses of 50, 100, and 150 pmol/kg/hr or a normal saline placebo on 3 successive days | 136 vs 67     | The primary end point (alive and free from respiratory failure at day 60) did not reach statistical significance between Aviptadil versus placebo                                    | Not effective | A multicenter, placebo controlled trial                        | 2b/3 (NCT04311697)    | [557] |
| <b>Baloxavir marboxil</b>                 | Anti-influenza drug                                                                                                | 29 hospitalized adults with COVID-19                                                                | China   | Baloxavir marboxil versus Favipiravir versus control                                                                                       | 10 vs 9 vs 10 | No benefit of addition of either baloxavir marboxil or favipiravir under the trial dosages to the existing standard treatment                                                        | Not effective | An exploratory randomized, controlled trial                    | ChiCTR2000029544      | [558] |
| <b>Losartan</b>                           | An angiotensin receptor blocker                                                                                    | 117 outpatients with mild symptomatic COVID-19                                                      | USA     | Losartan 25 mg orally twice daily for 10 days versus placebo                                                                               | 58 vs 59      | Losartan did not reduce hospitalizations in outpatients with mild symptomatic COVID-19                                                                                               | Not effective | A placebo-controlled blinded randomized clinical trial         | 2                     | [559] |
|                                           |                                                                                                                    | Hospitalized patients with covid-19-induced lung injury                                             | USA     | Losartan 50mg orally twice daily vs equivalent placebo for 10 days or until hospital discharge.                                            | 101 vs 104    | Losartan did not significantly affect PaO <sub>2</sub> :FiO <sub>2</sub> ratio at 7 days                                                                                             | Not effective | Blinded, placebo-controlled randomized clinical trial          | 2 (the ALPS-IP trial) | [560] |
| <b>Intravenous immunoglobulins (IVIG)</b> | A therapy treatment for patients with antibody deficiencies.                                                       | COVID-19 inpatients with invasive mechanical ventilation for up to 72 h and moderate-to-severe ARDS | France  | IVIG (2 g/kg over 4 days) or placebo                                                                                                       | 69 vs 77      | Intravenous immunoglobulins did not improve clinical outcomes at day 28 and tended to be associated with an increased frequency of serious adverse events, although not significant. | Not effective | A multicenter, double-blind, placebo controlled, phase 3 trial | 3                     | [561] |
|                                           | IgM-enriched immunoglobulins                                                                                       | Critically ill COVID-19 patients in ICU                                                             | Germany | 146 received IgM-enriched immunoglobulins, 170 cases did not.                                                                              | 146 vs 170    | IgM-enriched immunoglobulins did not improve 30-day survival.                                                                                                                        | Not effective | A multicentre propensity-weighted cohort study                 |                       | [562] |

|                      |                                                                        |                                                                      |        |                                                                        |            |                                                                                              |               |                                                                                   |   |       |
|----------------------|------------------------------------------------------------------------|----------------------------------------------------------------------|--------|------------------------------------------------------------------------|------------|----------------------------------------------------------------------------------------------|---------------|-----------------------------------------------------------------------------------|---|-------|
| <b>Almitrine</b>     | An agonist of peripheral chemoreceptors located on the carotid bodies. | COVID-19 inpatients experiencing acute hypoxemic respiratory failure | France | 5 days of intravenous low-dose (2 µg/kg/min) almitrine versus placebo. | 89 vs 92   | Low-dose almitrine failed in reducing the need for mechanical ventilation or death at day 7. | Not effective | A multicenter, randomized, double blind, placebo-controlled trial                 | 3 | [563] |
| <b>Brensocaticib</b> | An investigational oral inhibitor of dipeptidyl peptidase-1            | COVID-19 inpatients with at least one risk factor for severe disease | UK     | Once-daily brensocaticib 25 mg or placebo orally for 28 days           | 192 vs 214 | Brensocaticib failed to improve clinical status at day 29 in COVID-19 inpatients             | Not effective | A multicenter, double-blind, randomized, parallel-group, placebo-controlled trial | 3 | [564] |

**Table S5: Summary of FDA-approved cytokine antagonists**

| <b>Drug target</b>      | <b>Drug name</b>     | <b>FDA-approved indications</b>                                                                                                                                        | <b>Approved year</b> |
|-------------------------|----------------------|------------------------------------------------------------------------------------------------------------------------------------------------------------------------|----------------------|
| Interleukin-1<br>(IL-1) | <u>Canakinumab</u>   | Periodic fever syndromes;<br>Active systemic juvenile idiopathic arthritis                                                                                             | 2009                 |
|                         | <u>Rilonacept</u>    | Cryopyrin-associated periodic syndromes                                                                                                                                | 2008                 |
| IL-1 receptor           | <u>Anakinra</u>      | Rheumatoid arthritis;<br>Cryopyrin-associated periodic syndromes                                                                                                       | 2001                 |
| IL-2                    | <u>Basiliximab</u>   | Immunosuppression therapy of organ transplantation                                                                                                                     | 1998                 |
| IL-2 receptor           | <u>Daclizumab</u>    | Relapsing forms of multiple sclerosis                                                                                                                                  | 2016                 |
| IL-4 receptor           | <u>Dupilumab</u>     | Moderate-to-severe atopic dermatitis                                                                                                                                   | 2017                 |
| IL-5                    | <u>Mepolizumab</u>   | Severe eosinophilic asthma;<br>Chronic rhinosinusitis with nasal polyps;<br>Eosinophilic granulomatosis with polyangiitis;<br>Hypereosinophilic syndrome               | 2015                 |
|                         | <u>Reslizumab</u>    | Add-on maintenance treatment of patients with severe asthma with an eosinophilic phenotype                                                                             | 2016                 |
| IL-5 receptor           | <u>Benralizumab</u>  | Severe asthma with an eosinophilic phenotype                                                                                                                           | 2017                 |
| IL-6                    | <u>Siltuximab</u>    | Multicentric Castleman's disease                                                                                                                                       | 2014                 |
| IL-6 receptor           | <u>Tocilizumab</u>   | Rheumatoid arthritis;<br>Giant cell arteritis;<br>Polyarticular juvenile idiopathic arthritis;<br>Systemic juvenile idiopathic arthritis;<br>Cytokine release syndrome | 2010                 |
|                         | <u>Sarilumab</u>     | Moderately to severely active rheumatoid arthritis                                                                                                                     | 2017                 |
|                         | <u>Satralizumab</u>  | Neuromyelitis optica spectrum disorder                                                                                                                                 | 2020                 |
| IL-12, IL-23            | <u>Ustekinumab</u>   | Moderate to severe plaque psoriasis;<br>Active psoriatic arthritis;<br>Moderately to severely active crohn's disease                                                   | 2009                 |
| IL-13                   | <u>Tralokinumab</u>  | Moderate-to-severe atopic dermatitis                                                                                                                                   | 2021                 |
| IL-17                   | <u>Ixekizumab</u>    | Moderate-to-severe plaque psoriasis;<br>Active psoriatic arthritis                                                                                                     | 2016                 |
|                         | <u>Secukinumab</u>   | Moderate to severe plaque psoriasis;<br>Adults with active psoriatic arthritis;<br>Adults with active ankylosing spondylitis                                           | 2015                 |
| IL-17 receptor          | <u>Brodalumab</u>    | Moderate to severe plaque psoriasis                                                                                                                                    | 2017                 |
| IL-23                   | <u>Guselkumab</u>    | Moderate-to-severe plaque psoriasis                                                                                                                                    | 2017                 |
|                         | <u>Risankizumab</u>  | Moderate-to-severe plaque psoriasis;<br>Active psoriatic arthritis                                                                                                     | 2019                 |
|                         | <u>Tildrakizumab</u> | Moderate-to-severe plaque psoriasis                                                                                                                                    | 2018                 |



## References

1. Shin D, Mukherjee R, Grewe D, Bojkova D, Baek K, Bhattacharya A, Schulz L, Widera M, Mehdipour AR, Tascher G *et al*: **Papain-like protease regulates SARS-CoV-2 viral spread and innate immunity.** *Nature* 2020, **587**(7835):657-662.
2. Srinivasan V, Brognaro H, Prabhu PR, de Souza EE, Gunther S, Reinke PYA, Lane TJ, Ginn H, Han H, Ewert W *et al*: **Antiviral activity of natural phenolic compounds in complex at an allosteric site of SARS-CoV-2 papain-like protease.** *Commun Biol* 2022, **5**(1):805.
3. Ahmed-Belkacem R, Hausdorff M, Delpal A, Sutto-Ortiz P, Colmant AMG, Touret F, Ogando NS, Snijder EJ, Canard B, Coutard B *et al*: **Potent Inhibition of SARS-CoV-2 nsp14 N7-Methyltransferase by Sulfonamide-Based Bisubstrate Analogues.** *J Med Chem* 2022, **65**(8):6231-6249.
4. Rona G, Zeke A, Miwatani-Minter B, de Vries M, Kaur R, Schinlever A, Garcia SF, Goldberg HV, Wang H, Hinds TR *et al*: **The NSP14/NSP10 RNA repair complex as a Pan-coronavirus therapeutic target.** *Cell Death Differ* 2022, **29**(2):285-292.
5. Viswanathan T, Misra A, Chan SH, Qi S, Dai N, Arya S, Martinez-Sobrido L, Gupta YK: **A metal ion orients SARS-CoV-2 mRNA to ensure accurate 2'-O methylation of its first nucleotide.** *Nat Commun* 2021, **12**(1):3287.
6. Lu S, Ye Q, Singh D, Cao Y, Diedrich JK, Yates JR, 3rd, Villa E, Cleveland DW, Corbett KD: **The SARS-CoV-2 nucleocapsid phosphoprotein forms mutually exclusive condensates with RNA and the membrane-associated M protein.** *Nat Commun* 2021, **12**(1):502.
7. Afsar M, Narayan R, Akhtar MN, Das D, Rahil H, Nagaraj SK, Eswarappa SM, Tripathi S, Hussain T: **Drug targeting Nsp1-ribosomal complex shows antiviral activity against SARS-CoV-2.** *Elife* 2022, **11**:e74877.
8. Yuan S, Gao X, Tang K, Cai JP, Hu M, Luo P, Wen L, Ye ZW, Luo C, Tsang JO *et al*: **Targeting papain-like protease for broad-spectrum coronavirus inhibition.** *Protein Cell* 2022, **13**(12):940-953.
9. Freitas BT, Durie IA, Murray J, Longo JE, Miller HC, Crich D, Hogan RJ, Tripp RA, Pegan SD: **Characterization and Noncovalent Inhibition of the Deubiquitinase and deISGylase Activity of SARS-CoV-2 Papain-Like Protease.** *ACS Infect Dis* 2020, **6**(8):2099-2109.
10. Shen Z, Ratia K, Cooper L, Kong D, Lee H, Kwon Y, Li Y, Alqarni S, Huang F, Dubrovskiy O *et al*: **Design of SARS-CoV-2 PLpro Inhibitors for COVID-19 Antiviral Therapy Leveraging Binding Cooperativity.** *J Med Chem* 2022, **65**(4):2940-2955.
11. Swaim CD, Dwivedi V, Perng YC, Zhao X, Canadeo LA, Harastani HH, Darling TL, Boon ACM, Lenschow DJ, Kulkarni V *et al*: **6-Thioguanine blocks SARS-CoV-2 replication by inhibition of PLpro.** *iScience* 2021, **24**(10):103213.
12. Ma C, Sacco MD, Xia Z, Lambrinidis G, Townsend JA, Hu Y, Meng X, Szeto T, Ba M, Zhang X *et al*: **Discovery of SARS-CoV-2 Papain-like Protease Inhibitors through a Combination of High-Throughput Screening and a FlipGFP-Based Reporter Assay.** *ACS Cent Sci* 2021, **7**(7):1245-1260.
13. Patchett S, Lv Z, Rut W, Bekes M, Drag M, Olsen SK, Huang TT: **A molecular sensor determines the ubiquitin substrate specificity of SARS-CoV-2 papain-like protease.** *Cell Rep* 2021, **36**(13):109754.
14. Napolitano V, Dabrowska A, Schorpp K, Mourao A, Barreto-Duran E, Benedyk M, Botwina P, Brandner S, Bostock M, Chykunova Y *et al*: **Acriflavine, a clinically approved drug, inhibits SARS-CoV-2 and other betacoronaviruses.** *Cell Chem Biol* 2022, **29**(5):774-784.e778.
15. Liu N, Zhang Y, Lei Y, Wang R, Zhan M, Liu J, An Y, Zhou Y, Zhan J, Yin F *et al*: **Design and Evaluation of a Novel Peptide-Drug Conjugate Covalently Targeting SARS-CoV-2 Papain-like Protease.** *J Med Chem* 2022, **65**(1):876-884.
16. Shan H, Liu J, Shen J, Dai J, Xu G, Lu K, Han C, Wang Y, Xu X, Tong Y *et al*: **Development of potent and selective inhibitors targeting the papain-like protease of SARS-CoV-2.** *Cell Chem Biol* 2021, **28**(6):855-865.e859.
17. Zhao Y, Du X, Duan Y, Pan X, Sun Y, You T, Han L, Jin Z, Shang W, Yu J *et al*: **High-throughput screening identifies established drugs as SARS-CoV-2 PLpro inhibitors.** *Protein Cell* 2021, **12**(11):877-888.
18. Meewan I, Kattoula J, Kattoula JY, Skinner D, Fajtova P, Giardini MA, Woodworth B, McKerrow JH, Lage de Siqueira-Neto J, O'Donoghue AJ *et al*: **Discovery of Triple Inhibitors of Both SARS-CoV-2 Proteases and Human Cathepsin L.** *Pharmaceuticals (Basel)* 2022, **15**(6):744.

19. Klemm T, Ebert G, Calleja DJ, Allison CC, Richardson LW, Bernardini JP, Lu BG, Kuchel NW, Grohmann C, Shibata Y *et al*: **Mechanism and inhibition of the papain-like protease, PLpro, of SARS-CoV-2.** *EMBO J* 2020, **39**(18):e106275.
20. Ma C, Hu Y, Wang Y, Choza J, Wang J: **Drug-Repurposing Screening Identified Tropifexor as a SARS-CoV-2 Papain-like Protease Inhibitor.** *ACS Infect Dis* 2022, **8**(5):1022-1030.
21. Weglarz-Tomczak E, Tomczak JM, Talma M, Burda-Grabowska M, Giurg M, Brul S: **Identification of ebselen and its analogues as potent covalent inhibitors of papain-like protease from SARS-CoV-2.** *Sci Rep* 2021, **11**(1):3640.
22. Osipiuk J, Azizi SA, Dvorkin S, Endres M, Jedrzejczak R, Jones KA, Kang S, Kathayat RS, Kim Y, Lisnyak VG *et al*: **Structure of papain-like protease from SARS-CoV-2 and its complexes with non-covalent inhibitors.** *Nat Commun* 2021, **12**(1):743.
23. Sargsyan K, Lin CC, Chen T, Grauffel C, Chen YP, Yang WZ, Yuan HS, Lim C: **Multi-targeting of functional cysteines in multiple conserved SARS-CoV-2 domains by clinically safe Zn-ejectors.** *Chem Sci* 2020, **11**(36):9904-9909.
24. Hu H, Wang Q, Su H, Shao Q, Zhao W, Chen G, Li M, Xu Y: **Identification of Cysteine 270 as a Novel Site for Allosteric Modulators of SARS-CoV-2 Papain-Like Protease.** *Angew Chem Int Ed Engl* 2022, **61**(52):e202212378.
25. Chen X, Chen K, Zhang Z, Wei P, Zhang L, Xu Y, Lun Q, Ma Y, Wu F, Zhang Y *et al*: **Investigating Derivatives of Tanshinone IIA Sulfonate Sodium and Chloroxine for Their Inhibition Activities against the SARS-CoV-2 Papain-like Protease.** *ACS Omega* 2022, **7**(51):48416-48426.
26. Kuo CJ, Chao TL, Kao HC, Tsai YM, Liu YK, Wang LH, Hsieh MC, Chang SY, Liang PH: **Kinetic Characterization and Inhibitor Screening for the Proteases Leading to Identification of Drugs against SARS-CoV-2.** *Antimicrob Agents Chemother* 2021, **65**(4):e02577-02520.
27. Yu W, Zhao Y, Ye H, Wu N, Liao Y, Chen N, Li Z, Wan N, Hao H, Yan H *et al*: **Structure-Based Design of a Dual-Targeted Covalent Inhibitor Against Papain-like and Main Proteases of SARS-CoV-2.** *J Med Chem* 2022, **65**(24):16252-16267.
28. Yi Y, Zhang M, Xue H, Yu R, Bao YO, Kuang Y, Chai Y, Ma W, Wang J, Shi X *et al*: **Schaftoside inhibits 3CL(pro) and PL(pro) of SARS-CoV-2 virus and regulates immune response and inflammation of host cells for the treatment of COVID-19.** *Acta Pharm Sin B* 2022, **12**(11):4154-4164.
29. van Vliet VJE, Huynh N, Pala J, Patel A, Singer A, Slater C, Chung J, van Huizen M, Teyra J, Miersch S *et al*: **Ubiquitin variants potently inhibit SARS-CoV-2 PLpro and viral replication via a novel site distal to the protease active site.** *PLoS Pathog* 2022, **18**(12):e1011065.
30. Roy A, Alhammad YM, McDonald P, Johnson DK, Zhuo J, Wazir S, Ferraris D, Lehtio L, Leung AKL, Fehr AR: **Discovery of compounds that inhibit SARS-CoV-2 Mac1-ADP-ribose binding by high-throughput screening.** *Antiviral Res* 2022, **203**:105344.
31. Dasovich M, Zhuo J, Goodman JA, Thomas A, McPherson RL, Jayabalan AK, Busa VF, Cheng SJ, Murphy BA, Redinger KR *et al*: **High-Throughput Activity Assay for Screening Inhibitors of the SARS-CoV-2 Mac1 Macrodomain.** *ACS Chem Biol* 2022, **17**(1):17-23.
32. Gahbauer S, Correy GJ, Schuller M, Ferla MP, Doruk YU, Rachman M, Wu T, Diolaiti M, Wang S, Neitz RJ *et al*: **Iterative computational design and crystallographic screening identifies potent inhibitors targeting the Nsp3 macrodomain of SARS-CoV-2.** *Proc Natl Acad Sci U S A* 2023, **120**(2):e2212931120.
33. Owen DR, Allerton CMN, Anderson AS, Aschenbrenner L, Avery M, Berritt S, Boras B, Cardin RD, Carlo A, Coffman KJ *et al*: **An oral SARS-CoV-2 M(pro) inhibitor clinical candidate for the treatment of COVID-19.** *Science* 2021, **374**(6575):1586-1593.
34. Vankadara S, Dawson MD, Fong JY, Oh QY, Ang QA, Liu B, Chang HY, Koh J, Koh X, Tan QW *et al*: **A Warhead Substitution Study on the Coronavirus Main Protease Inhibitor Nirmatrelvir.** *ACS Med Chem Lett* 2022, **13**(8):1345-1350.
35. Brewitz L, Dumjahn L, Zhao Y, Owen CD, Laidlaw SM, Malla TR, Nguyen D, Lukacik P, Salah E, Crawshaw AD *et al*: **Alkyne Derivatives of SARS-CoV-2 Main Protease Inhibitors Including Nirmatrelvir Inhibit by Reacting Covalently with the Nucleophilic Cysteine.** *J Med Chem* 2023.
36. Sasaki M, Tabata K, Kishimoto M, Itakura Y, Kobayashi H, Ariizumi T, Uemura K, Toba S, Kusakabe S, Maruyama Y *et al*: **S-217622, a SARS-CoV-2 main protease inhibitor, decreases viral load and ameliorates COVID-19 severity in hamsters.** *Sci Transl Med* 2023, **15**(679):eabq4064.

37. Boras B, Jones RM, Anson BJ, Arenson D, Aschenbrenner L, Bakowski MA, Beutler N, Binder J, Chen E, Eng H *et al*: **Preclinical characterization of an intravenous coronavirus 3CL protease inhibitor for the potential treatment of COVID19.** *Nat Commun* 2021, **12**(1):6055.
38. Shang W, Dai W, Yao C, Xu L, Tao X, Su H, Li J, Xie X, Xu Y, Hu M *et al*: **In vitro and in vivo evaluation of the main protease inhibitor FB2001 against SARS-CoV-2.** *Antiviral Res* 2022, **208**:105450.
39. Drayman N, DeMarco JK, Jones KA, Azizi SA, Froggatt HM, Tan K, Maltseva NI, Chen S, Nicolaescu V, Dvorkin S *et al*: **Masitinib is a broad coronavirus 3CL inhibitor that blocks replication of SARS-CoV-2.** *Science* 2021, **373**(6557):931-936.
40. Jin Z, Du X, Xu Y, Deng Y, Liu M, Zhao Y, Zhang B, Li X, Zhang L, Peng C *et al*: **Structure of M(pro) from SARS-CoV-2 and discovery of its inhibitors.** *Nature* 2020, **582**(7811):289-293.
41. Huff S, Kummetha IR, Tiwari SK, Huante MB, Clark AE, Wang S, Bray W, Smith D, Carlin AF, Endsley M *et al*: **Discovery and Mechanism of SARS-CoV-2 Main Protease Inhibitors.** *J Med Chem* 2022, **65**(4):2866-2879.
42. Morita T, Miyakawa K, Jeremiah SS, Yamaoka Y, Sada M, Kuniyoshi T, Yang J, Kimura H, Ryo A: **All-Trans Retinoic Acid Exhibits Antiviral Effect against SARS-CoV-2 by Inhibiting 3CLpro Activity.** *Viruses* 2021, **13**(8):1669.
43. Hoffman RL, Kania RS, Brothers MA, Davies JF, Ferre RA, Gajiwala KS, He M, Hogan RJ, Kozminski K, Li LY *et al*: **Discovery of Ketone-Based Covalent Inhibitors of Coronavirus 3CL Proteases for the Potential Therapeutic Treatment of COVID-19.** *J Med Chem* 2020, **63**(21):12725-12747.
44. de Vries M, Mohamed AS, Prescott RA, Valero-Jimenez AM, Desvignes L, O'Connor R, Stepan C, Devlin JC, Ivanova E, Herrera A *et al*: **A comparative analysis of SARS-CoV-2 antivirals characterizes 3CL(pro) inhibitor PF-00835231 as a potential new treatment for COVID-19.** *J Virol* 2021, **95**(10):e01819-01820.
45. Amporndanai K, Meng X, Shang W, Jin Z, Rogers M, Zhao Y, Rao Z, Liu ZJ, Yang H, Zhang L *et al*: **Inhibition mechanism of SARS-CoV-2 main protease by ebiselen and its derivatives.** *Nat Commun* 2021, **12**(1):3061.
46. Vuong W, Khan MB, Fischer C, Arutyunova E, Lamer T, Shields J, Saffran HA, McKay RT, van Belkum MJ, Joyce MA *et al*: **Feline coronavirus drug inhibits the main protease of SARS-CoV-2 and blocks virus replication.** *Nat Commun* 2020, **11**(1):4282.
47. Ma C, Sacco MD, Hurst B, Townsend JA, Hu Y, Szeto T, Zhang X, Tarbet B, Marty MT, Chen Y *et al*: **Boceprevir, GC-376, and calpain inhibitors II, XII inhibit SARS-CoV-2 viral replication by targeting the viral main protease.** *Cell Res* 2020, **30**(8):678-692.
48. Gurard-Levin ZA, Liu C, Jekle A, Jaisinghani R, Ren S, Vandyck K, Jochmans D, Leyssen P, Neyts J, Blatt LM *et al*: **Evaluation of SARS-CoV-2 3C-like protease inhibitors using self-assembled monolayer desorption ionization mass spectrometry.** *Antiviral Res* 2020, **182**:104924.
49. Sacco MD, Ma C, Lagarias P, Gao A, Townsend JA, Meng X, Dube P, Zhang X, Hu Y, Kitamura N *et al*: **Structure and inhibition of the SARS-CoV-2 main protease reveal strategy for developing dual inhibitors against M(pro) and cathepsin L.** *Sci Adv* 2020, **6**(50):eabe0751.
50. Iketani S, Forouhar F, Liu H, Hong SJ, Lin FY, Nair MS, Zask A, Huang Y, Xing L, Stockwell BR *et al*: **Lead compounds for the development of SARS-CoV-2 3CL protease inhibitors.** *Nat Commun* 2021, **12**(1):2016.
51. Hattori SI, Higashi-Kuwata N, Hayashi H, Allu SR, Raghavaiah J, Bulut H, Das D, Anson BJ, Lendy EK, Takamatsu Y *et al*: **A small molecule compound with an indole moiety inhibits the main protease of SARS-CoV-2 and blocks virus replication.** *Nat Commun* 2021, **12**(1):668.
52. Konno S, Kobayashi K, Senda M, Funai Y, Seki Y, Tamai I, Schakel L, Sakata K, Pillaiyar T, Taguchi A *et al*: **3CL Protease Inhibitors with an Electrophilic Arylketone Moiety as Anti-SARS-CoV-2 Agents.** *J Med Chem* 2022, **65**(4):2926-2939.
53. Hu X, Lin C, Xu Q, Zhou X, Zeng P, McCormick PJ, Jiang H, Li J, Zhang J: **Structural Basis for the Inhibition of Coronaviral Main Proteases by a Benzothiazole-Based Inhibitor.** *Viruses* 2022, **14**(9):2075.
54. Zhang L, Lin D, Sun X, Curth U, Drosten C, Sauerhering L, Becker S, Rox K, Hilgenfeld R: **Crystal structure of SARS-CoV-2 main protease provides a basis for design of improved alpha-ketoamide inhibitors.** *Science* 2020, **368**(6489):409-412.
55. Zhang L, Lin D, Kusov Y, Nian Y, Ma Q, Wang J, von Brunn A, Leyssen P, Lanko K, Neyts J *et al*: **alpha-Ketoamides as Broad-Spectrum Inhibitors of Coronavirus and Enterovirus**

- Replication: Structure-Based Design, Synthesis, and Activity Assessment.** *J Med Chem* 2020, **63**(9):4562-4578.
56. Cooper MS, Zhang L, Ibrahim M, Zhang K, Sun X, Roske J, Gohl M, Bronstrup M, Cowell JK, Sauerhering L *et al*: **Diastereomeric Resolution Yields Highly Potent Inhibitor of SARS-CoV-2 Main Protease.** *J Med Chem* 2022, **65**(19):13328-13342.
  57. Lockbaum GJ, Henes M, Lee JM, Timm J, Nalivaika EA, Thompson PR, Kurt Yilmaz N, Schiffer CA: **Pan-3C Protease Inhibitor Rupintrivir Binds SARS-CoV-2 Main Protease in a Unique Binding Mode.** *Biochemistry* 2021, **60**(39):2925-2931.
  58. Rathnayake AD, Zheng J, Kim Y, Perera KD, Mackin S, Meyerholz DK, Kashipathy MM, Battaile KP, Lovell S, Perlman S *et al*: **3C-like protease inhibitors block coronavirus replication in vitro and improve survival in MERS-CoV-infected mice.** *Sci Transl Med* 2020, **12**(557):eabc5332.
  59. Kitamura N, Sacco MD, Ma C, Hu Y, Townsend JA, Meng X, Zhang F, Zhang X, Ba M, Szeto T *et al*: **Expedited Approach toward the Rational Design of Noncovalent SARS-CoV-2 Main Protease Inhibitors.** *J Med Chem* 2022, **65**(4):2848-2865.
  60. Vandyck K, Abdelnabi R, Gupta K, Jochmans D, Jekle A, Deval J, Misner D, Bardiot D, Foo CS, Liu C *et al*: **ALG-097111, a potent and selective SARS-CoV-2 3-chymotrypsin-like cysteine protease inhibitor exhibits in vivo efficacy in a Syrian Hamster model.** *Biochem Biophys Res Commun* 2021, **555**:134-139.
  61. Tao X, Zhang L, Du L, Liao R, Cai H, Lu K, Zhao Z, Xie Y, Wang PH, Pan JA *et al*: **Allosteric inhibition of SARS-CoV-2 3CL protease by colloidal bismuth subcitrate.** *Chem Sci* 2021, **12**(42):14098-14102.
  62. Shcherbakov D, Baev D, Kalinin M, Dalinger A, Chirkova V, Belenkaya S, Khvostov A, Krut'ko D, Medved'ko A, Volosnikova E *et al*: **Design and Evaluation of Bispidine-Based SARS-CoV-2 Main Protease Inhibitors.** *ACS Med Chem Lett* 2022, **13**(1):140-147.
  63. Stille JK, Tjutrins J, Wang G, Venegas FA, Hennecker C, Rueda AM, Sharon I, Blaine N, Miron CE, Pinus S *et al*: **Design, synthesis and in vitro evaluation of novel SARS-CoV-2 3CL(pro) covalent inhibitors.** *Eur J Med Chem* 2022, **229**:114046.
  64. Zhang JW, Xiong Y, Wang F, Zhang FM, Yang X, Lin GQ, Tian P, Ge G, Gao D: **Discovery of 9,10-dihydrophenanthrene derivatives as SARS-CoV-2 3CL(pro) inhibitors for treating COVID-19.** *Eur J Med Chem* 2022, **228**:114030.
  65. Du R, Cooper L, Chen Z, Lee H, Rong L, Cui Q: **Discovery of chebulagic acid and punicalagin as novel allosteric inhibitors of SARS-CoV-2 3CL(pro).** *Antiviral Res* 2021, **190**:105075.
  66. Chan HTH, Moesser MA, Walters RK, Malla TR, Twidale RM, John T, Deeks HM, Johnston-Wood T, Mikhailov V, Sessions RB *et al*: **Discovery of SARS-CoV-2 M(pro) peptide inhibitors from modelling substrate and ligand binding.** *Chem Sci* 2021, **12**(41):13686-13703.
  67. Chamakuri S, Lu S, Ucisik MN, Bohren KM, Chen YC, Du HC, Faver JC, Jimmidi R, Li F, Li JY *et al*: **DNA-encoded chemistry technology yields expedient access to SARS-CoV-2 M(pro) inhibitors.** *Proc Natl Acad Sci U S A* 2021, **118**(36):e2111172118.
  68. Li X, Lidsky PV, Xiao Y, Wu CT, Garcia-Knight M, Yang J, Nakayama T, Nayak JV, Jackson PK, Andino R *et al*: **Ethacridine inhibits SARS-CoV-2 by inactivating viral particles.** *PLoS Pathog* 2021, **17**(9):e1009898.
  69. van de Sand L, Bormann M, Alt M, Schipper L, Heilingloh CS, Steinmann E, Todt D, Dittmer U, Elsner C, Witzke O *et al*: **Glycyrrhizin Effectively Inhibits SARS-CoV-2 Replication by Inhibiting the Viral Main Protease.** *Viruses* 2021, **13**(4):609.
  70. Li Y, Zhang J, Duan Z, Wang N, Sun X, Zhang Y, Fu L, Liu K, Yang Y, Pan S *et al*: **High-throughput screening and evaluation of repurposed drugs targeting the SARS-CoV-2 main protease.** *Signal Transduct Target Ther* 2021, **6**(1):356.
  71. Gunther S, Reinke PYA, Fernandez-Garcia Y, Lieske J, Lane TJ, Ginn HM, Koua FHM, Ehrt C, Ewert W, Oberthuer D *et al*: **X-ray screening identifies active site and allosteric inhibitors of SARS-CoV-2 main protease.** *Science* 2021, **372**(6542):642-646.
  72. Kneller DW, Galanie S, Phillips G, O'Neill HM, Coates L, Kovalevsky A: **Malleability of the SARS-CoV-2 3CL M(pro) Active-Site Cavity Facilitates Binding of Clinical Antivirals.** *Structure* 2020, **28**(12):1313-1320.e1313.
  73. Ma C, Tan H, Choza J, Wang Y, Wang J: **Validation and invalidation of SARS-CoV-2 main protease inhibitors using the Flip-GFP and Protease-Glo luciferase assays.** *Acta Pharm Sin B* 2022, **12**(4):1636-1651.
  74. Ghahremanpour MM, Tirado-Rives J, Deshmukh M, Ippolito JA, Zhang CH, Cabeza de Vaca I,

- Liosi ME, Anderson KS, Jorgensen WL: **Identification of 14 Known Drugs as Inhibitors of the Main Protease of SARS-CoV-2.** *ACS Med Chem Lett* 2020, **11**(12):2526-2533.
75. Jin Z, Zhao Y, Sun Y, Zhang B, Wang H, Wu Y, Zhu Y, Zhu C, Hu T, Du X *et al*: **Structural basis for the inhibition of SARS-CoV-2 main protease by antineoplastic drug carmofur.** *Nat Struct Mol Biol* 2020, **27**(6):529-532.
76. Su H, Yao S, Zhao W, Zhang Y, Liu J, Shao Q, Wang Q, Li M, Xie H, Shang W *et al*: **Identification of pyrogallol as a warhead in design of covalent inhibitors for the SARS-CoV-2 3CL protease.** *Nat Commun* 2021, **12**(1):3623.
77. Ghosh AK, Raghavaiah J, Shahabi D, Yadav M, Anson BJ, Lendy EK, Hattori SI, Higashi-Kuwata N, Mitsuya H, Mesecar AD: **Indole Chloropyridinyl Ester-Derived SARS-CoV-2 3CLpro Inhibitors: Enzyme Inhibition, Antiviral Efficacy, Structure-Activity Relationship, and X-ray Structural Studies.** *J Med Chem* 2021, **64**(19):14702-14714.
78. Ma C, Xia Z, Sacco MD, Hu Y, Townsend JA, Meng X, Choza J, Tan H, Jang J, Gongora MV *et al*: **Discovery of Di- and Trihaloacetamides as Covalent SARS-CoV-2 Main Protease Inhibitors with High Target Specificity.** *J Am Chem Soc* 2021, **143**(49):20697-20709.
79. Lockbaum GJ, Reyes AC, Lee JM, Tilvawala R, Nalivaika EA, Ali A, Kurt Yilmaz N, Thompson PR, Schiffer CA: **Crystal Structure of SARS-CoV-2 Main Protease in Complex with the Non-Covalent Inhibitor ML188.** *Viruses* 2021, **13**(2):174.
80. Han SH, Goins CM, Arya T, Shin WJ, Maw J, Hooper A, Sonawane DP, Porter MR, Bannister BE, Crouch RD *et al*: **Structure-Based Optimization of ML300-Derived, Noncovalent Inhibitors Targeting the Severe Acute Respiratory Syndrome Coronavirus 3CL Protease (SARS-CoV-2 3CL(pro)).** *J Med Chem* 2022, **65**(4):2880-2904.
81. Zhang CH, Spasov KA, Reilly RA, Hollander K, Stone EA, Ippolito JA, Liosi ME, Deshmukh MG, Tirado-Rives J, Zhang S *et al*: **Optimization of Triarylpyridinone Inhibitors of the Main Protease of SARS-CoV-2 to Low-Nanomolar Antiviral Potency.** *ACS Med Chem Lett* 2021, **12**(8):1325-1332.
82. Zhang CH, Stone EA, Deshmukh M, Ippolito JA, Ghahremanpour MM, Tirado-Rives J, Spasov KA, Zhang S, Takeo Y, Kudalkar SN *et al*: **Potent Noncovalent Inhibitors of the Main Protease of SARS-CoV-2 from Molecular Sculpting of the Drug Perampanel Guided by Free Energy Perturbation Calculations.** *ACS Cent Sci* 2021, **7**(3):467-475.
83. Rut W, Groborz K, Zhang L, Sun X, Zmudzinski M, Pawlik B, Wang X, Jochmans D, Neyts J, Mlynarski W *et al*: **SARS-CoV-2 M(pro) inhibitors and activity-based probes for patient-sample imaging.** *Nat Chem Biol* 2021, **17**(2):222-228.
84. Qiao J, Li YS, Zeng R, Liu FL, Luo RH, Huang C, Wang YF, Zhang J, Quan B, Shen C *et al*: **SARS-CoV-2 M(pro) inhibitors with antiviral activity in a transgenic mouse model.** *Science* 2021, **371**(6536):1374-1378.
85. Kneller DW, Li H, Galanie S, Phillips G, Labbe A, Weiss KL, Zhang Q, Arnould MA, Clyde A, Ma H *et al*: **Structural, Electronic, and Electrostatic Determinants for Inhibitor Binding to Subsites S1 and S2 in SARS-CoV-2 Main Protease.** *J Med Chem* 2021, **64**(23):17366-17383.
86. Dai W, Zhang B, Jiang XM, Su H, Li J, Zhao Y, Xie X, Jin Z, Peng J, Liu F *et al*: **Structure-based design of antiviral drug candidates targeting the SARS-CoV-2 main protease.** *Science* 2020, **368**(6497):1331-1335.
87. Zhang Y, Gao H, Hu X, Wang Q, Zhong F, Zhou X, Lin C, Yang Y, Wei J, Du W *et al*: **Structure-Based Discovery and Structural Basis of a Novel Broad-Spectrum Natural Product against the Main Protease of Coronavirus.** *J Virol* 2022, **96**(1):e0125321.
88. Deshmukh MG, Ippolito JA, Zhang CH, Stone EA, Reilly RA, Miller SJ, Jorgensen WL, Anderson KS: **Structure-guided design of a perampanel-derived pharmacophore targeting the SARS-CoV-2 main protease.** *Structure* 2021, **29**(8):823-833.e825.
89. Luttens A, Gullberg H, Abdurakhmanov E, Vo DD, Akaberi D, Talibov VO, Nekhotiaeva N, Vangeel L, De Jonghe S, Jochmans D *et al*: **Ultralarge Virtual Screening Identifies SARS-CoV-2 Main Protease Inhibitors with Broad-Spectrum Activity against Coronaviruses.** *J Am Chem Soc* 2022, **144**(7):2905-2920.
90. Glaser J, Sedova A, Galanie S, Kneller DW, Davidson RB, Maradzike E, Del Galdo S, Labbe A, Hsu DJ, Agarwal R *et al*: **Hit Expansion of a Noncovalent SARS-CoV-2 Main Protease Inhibitor.** *ACS Pharmacol Transl Sci* 2022, **5**(4):255-265.
91. Dai W, Jochmans D, Xie H, Yang H, Li J, Su H, Chang D, Wang J, Peng J, Zhu L *et al*: **Design, Synthesis, and Biological Evaluation of Peptidomimetic Aldehydes as Broad-Spectrum Inhibitors against Enterovirus and SARS-CoV-2.** *J Med Chem* 2022, **65**(4):2794-2808.
92. Liu H, Iketani S, Zask A, Khanizeman N, Bednarova E, Forouhar F, Fowler B, Hong SJ, Mohri

- H, Nair MS *et al*: **Development of optimized drug-like small molecule inhibitors of the SARS-CoV-2 3CL protease for treatment of COVID-19.** *Nat Commun* 2022, **13**(1):1891.
93. Quan BX, Shuai H, Xia AJ, Hou Y, Zeng R, Liu XL, Lin GF, Qiao JX, Li WP, Wang FL *et al*: **An orally available M(pro) inhibitor is effective against wild-type SARS-CoV-2 and variants including Omicron.** *Nat Microbiol* 2022, **7**(5):716-725.
94. Pillaiyar T, Flury P, Kruger N, Su H, Schakel L, Barbosa Da Silva E, Eppler O, Kronenberger T, Nie T, Luedtke S *et al*: **Small-Molecule Thioesters as SARS-CoV-2 Main Protease Inhibitors: Enzyme Inhibition, Structure-Activity Relationships, Antiviral Activity, and X-ray Structure Determination.** *J Med Chem* 2022, **65**(13):9376-9395.
95. Dou X, Sun Q, Xu G, Liu Y, Zhang C, Wang B, Lu Y, Guo Z, Su L, Huo T *et al*: **Discovery of 2-(furan-2-ylmethylene)hydrazine-1-carbothioamide derivatives as novel inhibitors of SARS-CoV-2 main protease.** *Eur J Med Chem* 2022, **238**:114508.
96. El-Baba TJ, Lutomski CA, Kantsadi AL, Malla TR, John T, Mikhailov V, Bolla JR, Schofield CJ, Zitzmann N, Vakonakis I *et al*: **Allosteric Inhibition of the SARS-CoV-2 Main Protease: Insights from Mass Spectrometry Based Assays\*.** *Angew Chem Int Ed Engl* 2020, **59**(52):23544-23548.
97. Yang KS, Ma XR, Ma Y, Alugubelli YR, Scott DA, Vatansever EC, Drelich AK, Sankaran B, Geng ZZ, Blankenship LR *et al*: **A Quick Route to Multiple Highly Potent SARS-CoV-2 Main Protease Inhibitors\*.** *ChemMedChem* 2021, **16**(6):942-948.
98. Kuzikov M, Costanzi E, Reinshagen J, Esposito F, Vangeel L, Wolf M, Ellinger B, Claussen C, Geisslinger G, Corona A *et al*: **Identification of Inhibitors of SARS-CoV-2 3CL-Pro Enzymatic Activity Using a Small Molecule in Vitro Repurposing Screen.** *ACS Pharmacol Transl Sci* 2021, **4**(3):1096-1110.
99. Wang Z, Zhao Y, Wang Q, Xing Y, Feng L, Kong J, Peng C, Zhang L, Yang H, Lu M: **Identification of proteasome and caspase inhibitors targeting SARS-CoV-2 M(pro).** *Signal Transduct Target Ther* 2021, **6**(1):214.
100. Dampalla CS, Kim Y, Bickmeier N, Rathnayake AD, Nguyen HN, Zheng J, Kashipathy MM, Baird MA, Battaille KP, Lovell S *et al*: **Structure-Guided Design of Conformationally Constrained Cyclohexane Inhibitors of Severe Acute Respiratory Syndrome Coronavirus-2 3CL Protease.** *J Med Chem* 2021, **64**(14):10047-10058.
101. Bai B, Belovodskiy A, Hena M, Kandadai AS, Joyce MA, Saffran HA, Shields JA, Khan MB, Arutyunova E, Lu J *et al*: **Peptidomimetic alpha-Acyloxymethylketone Warheads with Six-Membered Lactam P1 Glutamine Mimic: SARS-CoV-2 3CL Protease Inhibition, Coronavirus Antiviral Activity, and in Vitro Biological Stability.** *J Med Chem* 2022, **65**(4):2905-2925.
102. Cantrelle FX, Boll E, Brier L, Moschidi D, Belouzard S, Landry V, Leroux F, Dewitte F, Landrieu I, Dubuisson J *et al*: **NMR Spectroscopy of the Main Protease of SARS-CoV-2 and Fragment-Based Screening Identify Three Protein Hotspots and an Antiviral Fragment.** *Angew Chem Int Ed Engl* 2021, **60**(48):25428-25435.
103. Fu L, Shao S, Feng Y, Ye F, Sun X, Wang Q, Yu F, Wang Q, Huang B, Niu P *et al*: **Mechanism of Microbial Metabolite Leupeptin in the Treatment of COVID-19 by Traditional Chinese Medicine Herbs.** *mBio* 2021, **12**(5):e0222021.
104. Johansen-Leete J, Ullrich S, Fry SE, Frkic R, Bedding MJ, Aggarwal A, Ashhurst AS, Ekanayake KB, Mahawaththa MC, Sasi VM *et al*: **Antiviral cyclic peptides targeting the main protease of SARS-CoV-2.** *Chem Sci* 2022, **13**(13):3826-3836.
105. Kneller DW, Li H, Phillips G, Weiss KL, Zhang Q, Arnould MA, Jonsson CB, Surendranathan S, Parvathareddy J, Blakeley MP *et al*: **Covalent narpaprevir- and boceprevir-derived hybrid inhibitors of SARS-CoV-2 main protease.** *Nat Commun* 2022, **13**(1):2268.
106. Malla TR, Brewitz L, Muntean DG, Aslam H, Owen CD, Salah E, Tumber A, Lukacik P, Strain-Damerell C, Mikolajek H *et al*: **Penicillin Derivatives Inhibit the SARS-CoV-2 Main Protease by Reaction with Its Nucleophilic Cysteine.** *J Med Chem* 2022, **65**(11):7682-7696.
107. Zhong B, Peng W, Du S, Chen B, Feng Y, Hu X, Lai Q, Liu S, Zhou ZW, Fang P *et al*: **Oridonin Inhibits SARS-CoV-2 by Targeting Its 3C-Like Protease.** *Small Sci* 2022, **2**(6):2100124.
108. Wang H, Pei R, Li X, Deng W, Xing S, Zhang Y, Zhang C, He S, Sun H, Xiao S *et al*: **The structure-based design of peptidomimetic inhibitors against SARS-CoV-2 3C like protease as Potent anti-viral drug candidate.** *Eur J Med Chem* 2022, **238**:114458.
109. Dampalla CS, Rathnayake AD, Galasiti Kankanamalage AC, Kim Y, Perera KD, Nguyen HN, Miller MJ, Madden TK, Picard HR, Thurman HA *et al*: **Structure-Guided Design of Potent Spirocyclic Inhibitors of Severe Acute Respiratory Syndrome Coronavirus-2 3C-like Protease.** *J Med Chem* 2022, **65**(11):7818-7832.

110. Ma Y, Yang KS, Geng ZZ, Alugubelli YR, Shaabani N, Vatansever EC, Ma XR, Cho CC, Khatua K, Xiao J *et al*: **A multi-pronged evaluation of aldehyde-based tripeptidyl main protease inhibitors as SARS-CoV-2 antivirals.** *Eur J Med Chem* 2022, **240**:114570.
111. Alugubelli YR, Geng ZZ, Yang KS, Shaabani N, Khatua K, Ma XR, Vatansever EC, Cho CC, Ma Y, Xiao J *et al*: **A systematic exploration of boceprevir-based main protease inhibitors as SARS-CoV-2 antivirals.** *Eur J Med Chem* 2022, **240**:114596.
112. Samrat SK, Xu J, Xie X, Gianti E, Chen H, Zou J, Pattis JG, Elokely K, Lee H, Li Z *et al*: **Allosteric inhibitors of the main protease of SARS-CoV-2.** *Antiviral Res* 2022, **205**:105381.
113. Kuhl N, Lang J, Leuthold MM, Klein CD: **Discovery of potent benzoxaborole inhibitors against SARS-CoV-2 main and dengue virus proteases.** *Eur J Med Chem* 2022, **240**:114585.
114. Hirose Y, Shindo N, Mori M, Onitsuka S, Isogai H, Hamada R, Hiramoto T, Ochi J, Takahashi D, Ueda T *et al*: **Discovery of Chlorofluoroacetamide-Based Covalent Inhibitors for Severe Acute Respiratory Syndrome Coronavirus 2 3CL Protease.** *J Med Chem* 2022, **65**(20):13852-13865.
115. Gao S, Sylvester K, Song L, Claff T, Jing L, Woodson M, Weisse RH, Cheng Y, Schakel L, Petry M *et al*: **Discovery and Crystallographic Studies of Trisubstituted Piperazine Derivatives as Non-Covalent SARS-CoV-2 Main Protease Inhibitors with High Target Specificity and Low Toxicity.** *J Med Chem* 2022, **65**(19):13343-13364.
116. Fabrega-Ferrer M, Herrera-Morande A, Muriel-Goni S, Perez-Saavedra J, Bueno P, Castro V, Garaigorta U, Gastaminza P, Coll M: **Structure and inhibition of SARS-CoV-1 and SARS-CoV-2 main proteases by oral antiviral compound AG7404.** *Antiviral Res* 2022, **208**:105458.
117. Mondal S, Chen Y, Lockbaum GJ, Sen S, Chaudhuri S, Reyes AC, Lee JM, Kaur AN, Sultana N, Cameron MD *et al*: **Dual Inhibitors of Main Protease (M(Pro)) and Cathepsin L as Potent Antivirals against SARS-CoV2.** *J Am Chem Soc* 2022, **144**(46):21035-21045.
118. Pelliccia S, Cerchia C, Esposito F, Cannalire R, Corona A, Costanzi E, Kuzikov M, Gribbon P, Zaliani A, Brindisi M *et al*: **Easy access to alpha-ketoamides as SARS-CoV-2 and MERS M(pro) inhibitors via the PADAM oxidation route.** *Eur J Med Chem* 2022, **244**:114853.
119. Wang L, Yu Z, Wang S, Guo Z, Sun Q, Lai L: **Discovery of novel SARS-CoV-2 3CL protease covalent inhibitors using deep learning-based screen.** *Eur J Med Chem* 2022, **244**:114803.
120. Sun Q, Ye F, Liang H, Liu H, Li C, Lu R, Huang B, Zhao L, Tan W, Lai L: **Bardoxolone and bardoxolone methyl, two Nrf2 activators in clinical trials, inhibit SARS-CoV-2 replication and its 3C-like protease.** *Signal Transduct Target Ther* 2021, **6**(1):212.
121. Vatansever EC, Yang KS, Drelich AK, Kratch KC, Cho CC, Kempaiah KR, Hsu JC, Mellott DM, Xu S, Tseng CK *et al*: **Bepridil is potent against SARS-CoV-2 in vitro.** *Proc Natl Acad Sci U S A* 2021, **118**(10):e2012201118.
122. Gao S, Song L, Claff T, Woodson M, Sylvester K, Jing L, Weisse RH, Cheng Y, Strater N, Schakel L *et al*: **Discovery and Crystallographic Studies of Nonpeptidic Piperazine Derivatives as Covalent SARS-CoV-2 Main Protease Inhibitors.** *J Med Chem* 2022, **65**(24):16902-16917.
123. Breidenbach J, Lemke C, Pillaiyar T, Schakel L, Al Hamwi G, Dieltz M, Gedschold R, Geiger N, Lopez V, Mirza S *et al*: **Targeting the Main Protease of SARS-CoV-2: From the Establishment of High Throughput Screening to the Design of Tailored Inhibitors.** *Angew Chem Int Ed Engl* 2021, **60**(18):10423-10429.
124. Bai B, Arutyunova E, Khan MB, Lu J, Joyce MA, Saffran HA, Shields JA, Kandadai AS, Belovodskiy A, Hena M *et al*: **Peptidomimetic nitrile warheads as SARS-CoV-2 3CL protease inhibitors.** *RSC Med Chem* 2021, **12**(10):1722-1730.
125. Tedesco F, Calugi L, Lenci E, Trabocchi A: **Peptidomimetic Small-Molecule Inhibitors of 3CLPro Activity and Spike-ACE2 Interaction: Toward Dual-Action Molecules against Coronavirus Infections.** *J Org Chem* 2022, **87**(18):12041-12051.
126. Qin B, Craven GB, Hou P, Chesti J, Lu X, Child ES, Morgan RML, Niu W, Zhao L, Armstrong A *et al*: **Acrylamide fragment inhibitors that induce unprecedented conformational distortions in enterovirus 71 3C and SARS-CoV-2 main protease.** *Acta Pharm Sin B* 2022, **12**(10):3924-3933.
127. Brier L, Hassan H, Hanouille X, Landry V, Moschidi D, Desmarets L, Rouille Y, Dumont J, Herledan A, Warengem S *et al*: **Novel dithiocarbamates selectively inhibit 3CL protease of SARS-CoV-2 and other coronaviruses.** *Eur J Med Chem* 2023, **250**:115186.
128. Previti S, Ettari R, Calcaterra E, Di Maro S, Hammerschmidt SJ, Muller C, Ziebuhr J, Schirmeister T, Cosconati S, Zappala M: **Structure-based lead optimization of peptide-based vinyl methyl ketones as SARS-CoV-2 main protease inhibitors.** *Eur J Med Chem* 2023, **247**:115021.

129. Eberle RJ, Sevenich M, Gering I, Scharbert L, Strodel B, Lakomek NA, Santur K, Mohrluder J, Coronado MA, Willbold D: **Discovery of All-d-Peptide Inhibitors of SARS-CoV-2 3C-like Protease.** *ACS Chem Biol* 2023, **18**(2):315-330.
130. Sun Z, Wang L, Li X, Fan C, Xu J, Shi Z, Qiao H, Lan Z, Zhang X, Li L *et al*: **An extended conformation of SARS-CoV-2 main protease reveals allosteric targets.** *Proc Natl Acad Sci U S A* 2022, **119**(15):e2120913119.
131. Sun X, Liu Y, Huang Z, Xu W, Hu W, Yi L, Liu Z, Chan H, Zeng J, Liu X *et al*: **SARS-CoV-2 non-structural protein 6 triggers NLRP3-dependent pyroptosis by targeting ATP6AP1.** *Cell Death Differ* 2022, **29**(6):1240-1254.
132. Yi Y, Li J, Lai X, Zhang M, Kuang Y, Bao YO, Yu R, Hong W, Muturi E, Xue H *et al*: **Natural triterpenoids from licorice potently inhibit SARS-CoV-2 infection.** *J Adv Res* 2022, **36**:201-210.
133. Littler DR, Liu M, McAuley JL, Lowery SA, Illing PT, Gully BS, Purcell AW, Chandrashekar IR, Perlman S, Purcell DFJ *et al*: **A natural product compound inhibits coronaviral replication in vitro by binding to the conserved Nsp9 SARS-CoV-2 protein.** *J Biol Chem* 2021, **297**(6):101362.
134. Esposito G, Hunashal Y, Percipalle M, Venit T, Dieng MM, Fogolari F, Hassanzadeh G, Piano F, Gunsalus KC, Idaghdour Y *et al*: **NMR-Based Analysis of Nanobodies to SARS-CoV-2 Nsp9 Reveals a Possible Antiviral Strategy Against COVID-19.** *Adv Biol (Weinh)* 2021, **5**(12):e2101113.
135. Do TND, Donckers K, Vangeel L, Chatterjee AK, Gallay PA, Bobardt MD, Bilello JP, Cihlar T, De Jonghe S, Neyts J *et al*: **A robust SARS-CoV-2 replication model in primary human epithelial cells at the air liquid interface to assess antiviral agents.** *Antiviral Res* 2021, **192**:105122.
136. Kung YA, Chiang HJ, Li ML, Gong YN, Chiu HP, Hung CT, Huang PN, Huang SY, Wang PY, Hsu TA *et al*: **Acyl-Coenzyme A Synthetase Long-Chain Family Member 4 Is Involved in Viral Replication Organelle Formation and Facilitates Virus Replication via Ferroptosis.** *mBio* 2022, **13**(1):e0271721.
137. Xie Y, Yin W, Zhang Y, Shang W, Wang Z, Luan X, Tian G, Aisa HA, Xu Y, Xiao G *et al*: **Design and development of an oral remdesivir derivative VV116 against SARS-CoV-2.** *Cell Res* 2021, **31**(11):1212-1214.
138. Sheahan TP, Sims AC, Zhou S, Graham RL, Pruijssers AJ, Agostini ML, Leist SR, Schafer A, Dinnon KH, 3rd, Stevens LJ *et al*: **An orally bioavailable broad-spectrum antiviral inhibits SARS-CoV-2 in human airway epithelial cell cultures and multiple coronaviruses in mice.** *Sci Transl Med* 2020, **12**(541):eabb5883.
139. Zhao J, Guo S, Yi D, Li Q, Ma L, Zhang Y, Wang J, Li X, Guo F, Lin R *et al*: **A cell-based assay to discover inhibitors of SARS-CoV-2 RNA dependent RNA polymerase.** *Antiviral Res* 2021, **190**:105078.
140. Good SS, Westover J, Jung KH, Zhou XJ, Moussa A, La Colla P, Collu G, Canard B, Sommadossi JP: **AT-527, a Double Prodrug of a Guanosine Nucleotide Analog, Is a Potent Inhibitor of SARS-CoV-2 In Vitro and a Promising Oral Antiviral for Treatment of COVID-19.** *Antimicrob Agents Chemother* 2021, **65**(4):e02479-02420.
141. Schafer A, Martinez DR, Won JJ, Meganck RM, Moreira FR, Brown AJ, Gully KL, Zweigart MR, Conrad WS, May SR *et al*: **Therapeutic treatment with an oral prodrug of the remdesivir parental nucleoside is protective against SARS-CoV-2 pathogenesis in mice.** *Sci Transl Med* 2022, **14**(643):eabm3410.
142. Lo MK, Shrivastava-Ranjan P, Chatterjee P, Flint M, Beadle JR, Valiaeva N, Murphy J, Schooley RT, Hostetler KY, Montgomery JM *et al*: **Broad-Spectrum In Vitro Antiviral Activity of ODBG-P-RVn: An Orally-Available, Lipid-Modified Monophosphate Prodrug of Remdesivir Parent Nucleoside (GS-441524).** *Microbiol Spectr* 2021, **9**(3):e0153721.
143. Cao L, Li Y, Yang S, Li G, Zhou Q, Sun J, Xu T, Yang Y, Liao R, Shi Y *et al*: **The adenosine analog prodrug ATV006 is orally bioavailable and has preclinical efficacy against parental SARS-CoV-2 and variants.** *Sci Transl Med* 2022, **14**(661):eabm7621.
144. Hu H, Mady Traore MD, Li R, Yuan H, He M, Wen B, Gao W, Jonsson CB, Fitzpatrick EA, Sun D: **Optimization of the Prodrug Moiety of Remdesivir to Improve Lung Exposure/Selectivity and Enhance Anti-SARS-CoV-2 Activity.** *J Med Chem* 2022, **65**(18):12044-12054.
145. Sourimant J, Lieber CM, Aggarwal M, Cox RM, Wolf JD, Yoon JJ, Toots M, Ye C, Sticher Z, Kolykhalov AA *et al*: **4'-Fluorouridine is an oral antiviral that blocks respiratory syncytial virus and SARS-CoV-2 replication.** *Science* 2022, **375**(6577):161-167.



146. Shannon A, Selisko B, Le NT, Huchting J, Touret F, Piorkowski G, Fattorini V, Ferron F, Decroly E, Meier C *et al*: **Rapid incorporation of Favipiravir by the fast and permissive viral RNA polymerase complex results in SARS-CoV-2 lethal mutagenesis.** *Nat Commun* 2020, **11**(1):4682.
147. Ramirez S, Fernandez-Antunez C, Galli A, Underwood A, Pham LV, Ryberg LA, Feng S, Pedersen MS, Mikkelsen LS, Belouzard S *et al*: **Overcoming Culture Restriction for SARS-CoV-2 in Human Cells Facilitates the Screening of Compounds Inhibiting Viral Replication.** *Antimicrob Agents Chemother* 2021, **65**(7):e0009721.
148. Uemura K, Nobori H, Sato A, Sanaki T, Toba S, Sasaki M, Murai A, Saito-Tarashima N, Minakawa N, Orba Y *et al*: **5-Hydroxymethyltubercidin exhibits potent antiviral activity against flaviviruses and coronaviruses, including SARS-CoV-2.** *iScience* 2021, **24**(10):103120.
149. Zhao J, Liu Q, Yi D, Li Q, Guo S, Ma L, Zhang Y, Dong D, Guo F, Liu Z *et al*: **5-Iodotubercidin inhibits SARS-CoV-2 RNA synthesis.** *Antiviral Res* 2022, **198**:105254.
150. Dejmek M, Konkolova E, Eyer L, Strakova P, Svoboda P, Sala M, Krejcova K, Ruzek D, Boura E, Nencka R: **Non-Nucleotide RNA-Dependent RNA Polymerase Inhibitor That Blocks SARS-CoV-2 Replication.** *Viruses* 2021, **13**(8):1585.
151. Zhang GN, Zhao J, Li Q, Wang M, Zhu M, Wang J, Cen S, Wang Y: **Discovery and optimization of 2-((1H-indol-3-yl)thio)-N-benzyl-acetamides as novel SARS-CoV-2 RdRp inhibitors.** *Eur J Med Chem* 2021, **223**:113622.
152. Bertolin AP, Weissmann F, Zeng J, Posse V, Milligan JC, Canal B, Ulferts R, Wu M, Drury LS, Howell M *et al*: **Identifying SARS-CoV-2 antiviral compounds by screening for small molecule inhibitors of nsp12/7/8 RNA-dependent RNA polymerase.** *Biochem J* 2021, **478**(13):2425-2443.
153. Zhao J, Zhang G, Zhang Y, Yi D, Li Q, Ma L, Guo S, Li X, Guo F, Lin R *et al*: **2-((1H-indol-3-yl)thio)-N-phenyl-acetamides: SARS-CoV-2 RNA-dependent RNA polymerase inhibitors.** *Antiviral Res* 2021, **196**:105209.
154. Bennett RP, Postnikova EN, Eaton BP, Cai Y, Yu S, Smith CO, Liang J, Zhou H, Kocher GA, Murphy MJ *et al*: **Sanguinamycin is highly effective against SARS-CoV-2 in vitro and has favorable drug properties.** *JCI Insight* 2022, **7**(1):e153165.
155. Li Q, Yi D, Lei X, Zhao J, Zhang Y, Cui X, Xiao X, Jiao T, Dong X, Zhao X *et al*: **Corilagin inhibits SARS-CoV-2 replication by targeting viral RNA-dependent RNA polymerase.** *Acta Pharm Sin B* 2021, **11**(6):1555-1567.
156. Wang W, Li W, Wen Z, Wang C, Liu W, Zhang Y, Liu J, Ding T, Shuai L, Zhong G *et al*: **Gossypol Broadly Inhibits Coronaviruses by Targeting RNA-Dependent RNA Polymerases.** *Adv Sci (Weinh)* 2022, **9**(35):e2203499.
157. Zhou Q, Luo Y, Zhu Y, Chen Q, Qiu J, Cong F, Li Y, Zhang X: **Nonsteroidal anti-inflammatory drugs (NSAIDs) and nucleotide analog GS-441524 conjugates with potent in vivo efficacy against coronaviruses.** *Eur J Med Chem* 2023, **249**:115113.
158. Meng W, Guo S, Cao S, Shuda M, Robinson-McCarthy LR, McCarthy KR, Shuda Y, Paniz Mondolfi AE, Bryce C, Grimes Z *et al*: **Development and characterization of a new monoclonal antibody against SARS-CoV-2 NSP12 (RdRp).** *J Med Virol* 2023, **95**(1):e28246.
159. Yin W, Luan X, Li Z, Zhou Z, Wang Q, Gao M, Wang X, Zhou F, Shi J, You E *et al*: **Structural basis for inhibition of the SARS-CoV-2 RNA polymerase by suramin.** *Nat Struct Mol Biol* 2021, **28**(3):319-325.
160. Salgado-Benvindo C, Thaler M, Tas A, Ogando NS, Bredenbeek PJ, Ninaber DK, Wang Y, Hiemstra PS, Snijder EJ, van Hemert MJ: **Suramin Inhibits SARS-CoV-2 Infection in Cell Culture by Interfering with Early Steps of the Replication Cycle.** *Antimicrob Agents Chemother* 2020, **64**(8):e00900-00920.
161. Nizi MG, Persoons L, Corona A, Felicetti T, Cernicchi G, Massari S, Manfroni G, Vangeel L, Barreca ML, Esposito F *et al*: **Discovery of 2-Phenylquinolines with Broad-Spectrum Anti-coronavirus Activity.** *ACS Med Chem Lett* 2022, **13**(5):855-864.
162. Yazdi AK, Pakarian P, Perveen S, Hajian T, Santhakumar V, Bolotokova A, Li F, Vedadi M: **Kinetic Characterization of SARS-CoV-2 nsp13 ATPase Activity and Discovery of Small-Molecule Inhibitors.** *ACS Infect Dis* 2022, **8**(8):1533-1542.
163. Zeng J, Weissmann F, Bertolin AP, Posse V, Canal B, Ulferts R, Wu M, Harvey R, Hussain S, Milligan JC *et al*: **Identifying SARS-CoV-2 antiviral compounds by screening for small molecule inhibitors of nsp13 helicase.** *Biochem J* 2021, **478**(13):2405-2423.
164. Yuan S, Wang R, Chan JF, Zhang AJ, Cheng T, Chik KK, Ye ZW, Wang S, Lee AC, Jin L *et al*: **Metallodrug ranitidine bismuth citrate suppresses SARS-CoV-2 replication and relieves**

- virus-associated pneumonia in Syrian hamsters.** *Nat Microbiol* 2020, **5**(11):1439-1448.
165. Lu L, Peng Y, Yao H, Wang Y, Li J, Yang Y, Lin Z: **Punicalagin as an allosteric NSP13 helicase inhibitor potently suppresses SARS-CoV-2 replication in vitro.** *Antiviral Res* 2022, **206**:105389.
166. Corona A, Wycisk K, Talarico C, Manelfi C, Milia J, Cannalire R, Esposito F, Gribbon P, Zaliani A, Iaconis D *et al*: **Natural Compounds Inhibit SARS-CoV-2 nsp13 Unwinding and ATPase Enzyme Activities.** *ACS Pharmacol Transl Sci* 2022, **5**(4):226-239.
167. Otava T, Sala M, Li F, Fanfrlik J, Devkota K, Perveen S, Chau I, Pakarian P, Hobza P, Vedadi M *et al*: **The Structure-Based Design of SARS-CoV-2 nsp14 Methyltransferase Ligands Yields Nanomolar Inhibitors.** *ACS Infect Dis* 2021, **7**(8):2214-2220.
168. Canal B, McClure AW, Curran JF, Wu M, Ulferts R, Weissmann F, Zeng J, Bertolin AP, Milligan JC, Basu S *et al*: **Identifying SARS-CoV-2 antiviral compounds by screening for small molecule inhibitors of nsp14/nsp10 exoribonuclease.** *Biochem J* 2021, **478**(13):2445-2464.
169. Kasprzyk R, Spiewla TJ, Smietanski M, Golojuch S, Vangeel L, De Jonghe S, Jochmans D, Neyts J, Kowalska J, Jemielity J: **Identification and evaluation of potential SARS-CoV-2 antiviral agents targeting mRNA cap guanine N7-Methyltransferase.** *Antiviral Res* 2021, **193**:105142.
170. Baddock HT, Brolih S, Yosaatmadja Y, Ratnaweera M, Bielinski M, Swift LP, Cruz-Migoni A, Fan H, Keown JR, Walker AP *et al*: **Characterization of the SARS-CoV-2 ExoN (nsp14ExoN-nsp10) complex: implications for its role in viral genome stability and inhibitor identification.** *Nucleic Acids Res* 2022, **50**(3):1484-1500.
171. Bobrovs R, Kanepe I, Narvaiss N, Patetko L, Kalnins G, Sisovs M, Bula AL, Grinberga S, Boroduskis M, Ramata-Stunda A *et al*: **Discovery of SARS-CoV-2 Nsp14 and Nsp16 Methyltransferase Inhibitors by High-Throughput Virtual Screening.** *Pharmaceuticals (Basel)* 2021, **14**(12):1243.
172. Devkota K, Schapira M, Perveen S, Khalili Yazdi A, Li F, Chau I, Ghiabi P, Hajian T, Loppnau P, Bolotokova A *et al*: **Probing the SAM Binding Site of SARS-CoV-2 Nsp14 In Vitro Using SAM Competitive Inhibitors Guides Developing Selective Bisubstrate Inhibitors.** *SLAS Discov* 2021, **26**(9):1200-1211.
173. Jung E, Soto-Acosta R, Xie J, Wilson DJ, Dreis CD, Majima R, Edwards TC, Geraghty RJ, Chen L: **Bisubstrate Inhibitors of Severe Acute Respiratory Syndrome Coronavirus-2 Nsp14 Methyltransferase.** *ACS Med Chem Lett* 2022, **13**(9):1477-1484.
174. Canal B, Fujisawa R, McClure AW, Deegan TD, Wu M, Ulferts R, Weissmann F, Drury LS, Bertolin AP, Zeng J *et al*: **Identifying SARS-CoV-2 antiviral compounds by screening for small molecule inhibitors of nsp15 endoribonuclease.** *Biochem J* 2021, **478**(13):2465-2479.
175. Kim Y, Wower J, Maltseva N, Chang C, Jedrzejczak R, Wilamowski M, Kang S, Nicolaescu V, Randall G, Michalska K *et al*: **Tipiracil binds to uridine site and inhibits Nsp15 endoribonuclease NendoU from SARS-CoV-2.** *Commun Biol* 2021, **4**(1):193.
176. Choi R, Zhou M, Shek R, Wilson JW, Tillery L, Craig JK, Salukhe IA, Hickson SE, Kumar N, James RM *et al*: **High-throughput screening of the ReFRAME, Pandemic Box, and COVID Box drug repurposing libraries against SARS-CoV-2 nsp15 endoribonuclease to identify small-molecule inhibitors of viral activity.** *PLoS One* 2021, **16**(4):e0250019.
177. Bergant V, Yamada S, Grass V, Tsukamoto Y, Lavacca T, Krey K, Muhlhofer MT, Wittmann S, Ensser A, Herrmann A *et al*: **Attenuation of SARS-CoV-2 replication and associated inflammation by concomitant targeting of viral and host cap 2'-O-ribose methyltransferases.** *EMBO J* 2022, **41**(17):e111608.
178. Benoni R, Krafcikova P, Baranowski MR, Kowalska J, Boura E, Cahova H: **Substrate Specificity of SARS-CoV-2 Nsp10-Nsp16 Methyltransferase.** *Viruses* 2021, **13**(9):1722.
179. Bobileva O, Bobrovs R, Kanepe I, Patetko L, Kalnins G, Sisovs M, Bula AL, Gri Nberga S, Boroduskis MR, Ramata-Stunda A *et al*: **Potent SARS-CoV-2 mRNA Cap Methyltransferase Inhibitors by Bioisosteric Replacement of Methionine in SAM Cosubstrate.** *ACS Med Chem Lett* 2021, **12**(7):1102-1107.
180. Bouvet M, Debarnot C, Imbert I, Selisko B, Snijder EJ, Canard B, Decroly E: **In vitro reconstitution of SARS-coronavirus mRNA cap methylation.** *PLoS Pathog* 2010, **6**(4):e1000863.
181. Yuan S, Yin X, Meng X, Chan JF, Ye ZW, Riva L, Pache L, Chan CC, Lai PM, Chan CC *et al*: **Clofazimine broadly inhibits coronaviruses including SARS-CoV-2.** *Nature* 2021, **593**(7859):418-423.
182. Li Z, Wu J, Zhou J, Yuan B, Chen J, Wu W, Mo L, Qu Z, Zhou F, Dong Y *et al*: **A Vimentin-Targeting Oral Compound with Host-Directed Antiviral and Anti-Inflammatory Actions**

- Addresses Multiple Features of COVID-19 and Related Diseases.** *mBio* 2021, **12**(5):e0254221.
183. Chen Y, Wu Y, Chen S, Zhan Q, Wu D, Yang C, He X, Qiu M, Zhang N, Li Z *et al*: **Sertraline Is an Effective SARS-CoV-2 Entry Inhibitor Targeting the Spike Protein.** *J Virol* 2022, **96**(24):e0124522.
184. Bojadzic D, Alcazar O, Chen J, Chuang ST, Condor Capcha JM, Shehadeh LA, Buchwald P: **Small-Molecule Inhibitors of the Coronavirus Spike: ACE2 Protein-Protein Interaction as Blockers of Viral Attachment and Entry for SARS-CoV-2.** *ACS Infect Dis* 2021, **7**(6):1519-1534.
185. Lapaillerie D, Charlier C, Guyonnet-Duperat V, Murigneux E, Fernandes HS, Martins FG, Magalhaes RP, Vieira TF, Richetta C, Subra F *et al*: **Selection of Bis-Indolyl Pyridines and Triphenylamines as New Inhibitors of SARS-CoV-2 Cellular Entry by Modulating the Spike Protein/ACE2 Interfaces.** *Antimicrob Agents Chemother* 2022, **66**(8):e0008322.
186. Ratnapriya S, Braun AR, Cervera Benet H, Carlson D, Ding S, Paulson CN, Mishra N, Sachs JN, Aldrich CC, Finzi A *et al*: **Broad Tricyclic Ring Inhibitors Block SARS-CoV-2 Spike Function Required for Viral Entry.** *ACS Infect Dis* 2022, **8**(10):2045-2058.
187. Zhang X, Shi Y, Guo Z, Zhao X, Wu J, Cao S, Liu Y, Li Y, Huang W, Wang Y *et al*: **Clofazimine derivatives as potent broad-spectrum antiviral agents with dual-target mechanism.** *Eur J Med Chem* 2022, **234**:114209.
188. Acharya A, Pandey K, Thurman M, Klug E, Trivedi J, Sharma K, Lorson CL, Singh K, Byrareddy SN: **Discovery and evaluation of entry inhibitors for SARS-CoV-2 and its emerging variants.** *J Virol* 2021, **95**(24):e0143721.
189. Wang L, Wu Y, Yao S, Ge H, Zhu Y, Chen K, Chen WZ, Zhang Y, Zhu W, Wang HY *et al*: **Discovery of potential small molecular SARS-CoV-2 entry blockers targeting the spike protein.** *Acta Pharmacol Sin* 2021, **43**(4):788-796.
190. Shi Y, Zeida A, Edwards CE, Mallory ML, Sastre S, Machado MR, Pickles RJ, Fu L, Liu K, Yang J *et al*: **Thiol-based chemical probes exhibit antiviral activity against SARS-CoV-2 via allosteric disulfide disruption in the spike glycoprotein.** *Proc Natl Acad Sci U S A* 2022, **119**(6):e2120419119.
191. Pringle ES, Duguay BA, Bui-Marinis MP, Mulloy RP, Landreth SL, Desireddy KS, Dolliver SM, Ying S, Caddell T, Tooley TH *et al*: **Thiopurines inhibit coronavirus Spike protein processing and incorporation into progeny virions.** *PLoS Pathog* 2022, **18**(9):e1010832.
192. Jeong K, Chang J, Park SM, Kim J, Jeon S, Kim DH, Kim YE, Lee JC, Im S, Jo Y *et al*: **Rapid discovery and classification of inhibitors of coronavirus infection by pseudovirus screen and amplified luminescence proximity homogeneous assay.** *Antiviral Res* 2022, **209**:105473.
193. Li H, Cheng C, Shi S, Wu Y, Gao Y, Liu Z, Liu M, Li Z, Huo L, Pan X *et al*: **Identification, optimization, and biological evaluation of 3-O-beta-chacotriosyl ursolic acid derivatives as novel SARS-CoV-2 entry inhibitors by targeting the prefusion state of spike protein.** *Eur J Med Chem* 2022, **238**:114426.
194. Gross R, Dias Loiola LM, Issmail L, Uhlig N, Eberlein V, Conzelmann C, Olari LR, Rauch L, Lawrenz J, Weil T *et al*: **Macromolecular Viral Entry Inhibitors as Broad-Spectrum First-Line Antivirals with Activity against SARS-CoV-2.** *Adv Sci (Weinh)* 2022, **9**(20):e2201378.
195. Zhao H, Meng X, Peng Z, Lam H, Zhang C, Zhou X, Chan JF, Tsun Kao RY, To KKW, Yuen KY: **Fusion-inhibition peptide broadly inhibits influenza virus and SARS-CoV-2 including Delta and Omicron variants.** *Emerg Microbes Infect* 2022, **11**(1):926-937.
196. Lee M, Kang B, Lee J, Lee J, Jung ST, Son CY, Oh SS: **De novo selected hACE2 mimics that integrate hotspot peptides with aptameric scaffolds for binding tolerance of SARS-CoV-2 variants.** *Sci Adv* 2022, **8**(43):eabq6207.
197. Park BK, Kim J, Park S, Kim D, Kim M, Baek K, Bae JY, Park MS, Kim WK, Lee Y *et al*: **MERS-CoV and SARS-CoV-2 replication can be inhibited by targeting the interaction between the viral spike protein and the nucleocapsid protein.** *Theranostics* 2021, **11**(8):3853-3867.
198. King AM, Anderson DA, Glassey E, Segall-Shapiro TH, Zhang Z, Niquille DL, Embree AC, Pratt K, Williams TL, Gordon DB *et al*: **Selection for constrained peptides that bind to a single target protein.** *Nat Commun* 2021, **12**(1):6343.
199. Bi W, Chen G, Dang B: **Novel Engineered SARS-CoV-2 HR1 Trimer Exhibits Improved Potency and Broad-Spectrum Activity against SARS-CoV-2 and Its Variants.** *J Virol* 2022, **96**(13):e0068122.
200. Xing L, Xu X, Xu W, Liu Z, Shen X, Zhou J, Xu L, Pu J, Yang C, Huang Y *et al*: **A Five-Helix-Based SARS-CoV-2 Fusion Inhibitor Targeting Heptad Repeat 2 Domain against SARS-**

- CoV-2 and Its Variants of Concern.** *Viruses* 2022, **14**(3):597.
201. Lin X, Guo L, Lin S, Chen Z, Yang F, Yang J, Wang L, Wen A, Duan Y, Zhang X *et al*: **An engineered 5-helix bundle derived from SARS-CoV-2 S2 pre-binds sarbecoviral spike at both serological- and endosomal-pH to inhibit virus entry.** *Emerg Microbes Infect* 2022, **11**(1):1920-1935.
  202. Xue S, Wang X, Wang L, Xu W, Xia S, Sun L, Wang S, Shen N, Yang Z, Huang B *et al*: **A novel cyclic gamma-AApeptide-based long-acting pan-coronavirus fusion inhibitor with potential oral bioavailability by targeting two sites in spike protein.** *Cell Discov* 2022, **8**(1):88.
  203. Zhao H, To KK, Lam H, Zhang C, Peng Z, Meng X, Wang X, Zhang AJ, Yan B, Cai J *et al*: **A trifunctional peptide broadly inhibits SARS-CoV-2 Delta and Omicron variants in hamsters.** *Cell Discov* 2022, **8**(1):62.
  204. Khatri B, Pramanick I, Malladi SK, Rajmani RS, Kumar S, Ghosh P, Sengupta N, Rahisuddin R, Kumar N, Kumaran S *et al*: **A dimeric proteomimetic prevents SARS-CoV-2 infection by dimerizing the spike protein.** *Nat Chem Biol* 2022, **18**(10):1046-1055.
  205. Zhao H, Meng X, Peng Z, Lam H, Zhang C, Zhou X, Chan JF, Kao RYT, To KK, Yuen KY: **Fusion-inhibition peptide broadly inhibits influenza virus and SARS-CoV-2, including Delta and Omicron variants.** *Emerg Microbes Infect* 2022, **11**(1):926-937.
  206. Xia S, Lan Q, Zhu Y, Wang C, Xu W, Li Y, Wang L, Jiao F, Zhou J, Hua C *et al*: **Structural and functional basis for pan-CoV fusion inhibitors against SARS-CoV-2 and its variants with preclinical evaluation.** *Signal Transduct Target Ther* 2021, **6**(1):288.
  207. Xia S, Liu M, Wang C, Xu W, Lan Q, Feng S, Qi F, Bao L, Du L, Liu S *et al*: **Inhibition of SARS-CoV-2 (previously 2019-nCoV) infection by a highly potent pan-coronavirus fusion inhibitor targeting its spike protein that harbors a high capacity to mediate membrane fusion.** *Cell Res* 2020, **30**(4):343-355.
  208. Yang K, Wang C, Kreutzberger AJB, Ojha R, Kuivanen S, Couoh-Cardel S, Muratcioglu S, Eisen TJ, White KI, Held RG *et al*: **Nanomolar inhibition of SARS-CoV-2 infection by an unmodified peptide targeting the prehairpin intermediate of the spike protein.** *Proc Natl Acad Sci U S A* 2022, **119**(40):e2210990119.
  209. Hampton JT, Lalonde TJ, Sharp JM, Kurra Y, Alugubelli YR, Roundy CM, Hamer GL, Xu S, Liu WR: **Novel Regioselective Approach to Cyclize Phage-Displayed Peptides in Combination with Epitope-Directed Selection to Identify a Potent Neutralizing Macrocyclic Peptide for SARS-CoV-2.** *ACS Chem Biol* 2022, **17**(10):2911-2922.
  210. Zhou J, Xu W, Liu Z, Wang C, Xia S, Lan Q, Cai Y, Su S, Pu J, Xing L *et al*: **A highly potent and stable pan-coronavirus fusion inhibitor as a candidate prophylactic and therapeutic for COVID-19 and other coronavirus diseases.** *Acta Pharm Sin B* 2022, **12**(4):1652-1661.
  211. Zhu Y, Dong X, Liu N, Wu T, Chong H, Lei X, Ren L, Wang J, He Y: **SARS-CoV-2 fusion-inhibitory lipopeptides maintain high potency against divergent variants of concern including Omicron.** *Emerg Microbes Infect* 2022, **11**(1):1819-1827.
  212. Zhu Y, Hu Y, Liu N, Chong H, He Y: **Potent inhibition of diverse Omicron sublineages by SARS-CoV-2 fusion-inhibitory lipopeptides.** *Antiviral Res* 2022, **208**:105445.
  213. Thebault S, Lejal N, Dogliani A, Donchet A, Urvoas A, Valerio-Lepiniec M, Lavie M, Baronti C, Touret F, Da Costa B *et al*: **Biosynthetic proteins targeting the SARS-CoV-2 spike as antivirals.** *PLoS Pathog* 2022, **18**(9):e1010799.
  214. Chonira V, Kwon YD, Gorman J, Case JB, Ku Z, Simeon R, Casner RG, Harris DR, Olia AS, Stephens T *et al*: **A potent and broad neutralization of SARS-CoV-2 variants of concern by DARPins.** *Nat Chem Biol* 2023, **19**(3):284-291.
  215. Cohen AA, van Doremalen N, Greaney AJ, Andersen H, Sharma A, Starr TN, Keeffe JR, Fan C, Schulz JE, Gnanapragasam PNP *et al*: **Mosaic RBD nanoparticles protect against challenge by diverse sarbecoviruses in animal models.** *Science* 2022, **377**(6606):eabq0839.
  216. Chan JF, Oh YJ, Yuan S, Chu H, Yeung ML, Canena D, Chan CC, Poon VK, Chan CC, Zhang AJ *et al*: **A molecularly engineered, broad-spectrum anti-coronavirus lectin inhibits SARS-CoV-2 and MERS-CoV infection in vivo.** *Cell Rep Med* 2022, **3**(10):100774.
  217. Zhang ZR, Zhang YN, Zhang HQ, Zhang QY, Li N, Li Q, Deng CL, Zhang B, Li XD, Ye HQ: **Berberamine hydrochloride potently inhibits SARS-CoV-2 infection by blocking S protein-mediated membrane fusion.** *PLoS Negl Trop Dis* 2022, **16**(4):e0010363.
  218. Lin C, Li Y, Zhang Y, Liu Z, Mu X, Gu C, Liu J, Li Y, Li G, Chen J: **Ceftazidime is a potential drug to inhibit SARS-CoV-2 infection in vitro by blocking spike protein-ACE2 interaction.** *Signal Transduct Target Ther* 2021, **6**(1):198.
  219. Wang X, Luo J, Wen Z, Shuai L, Wang C, Zhong G, He X, Cao H, Liu R, Ge J *et al*: **Diltiazem**

- inhibits SARS-CoV-2 cell attachment and internalization and decreases the viral infection in mouse lung. *PLoS Pathog* 2022, **18**(2):e1010343.**
220. Milewska A, Chi Y, Szczepanski A, Barreto-Duran E, Dabrowska A, Botwina P, Obloza M, Liu K, Liu D, Guo X *et al*: **HTCC as a Polymeric Inhibitor of SARS-CoV-2 and MERS-CoV.** *J Virol* 2021, **95**(4):e01622-01620.
221. Yang G, Li Z, Mohammed I, Zhao L, Wei W, Xiao H, Guo W, Zhao Y, Qu F, Huang Y: **Identification of SARS-CoV-2-against aptamer with high neutralization activity by blocking the RBD domain of spike protein 1.** *Signal Transduct Target Ther* 2021, **6**(1):227.
222. de Vries RD, Schmitz KS, Bovier FT, Predella C, Khao J, Noack D, Haagmans BL, Herfst S, Stearns KN, Drew-Bear J *et al*: **Intranasal fusion inhibitory lipopeptide prevents direct-contact SARS-CoV-2 transmission in ferrets.** *Science* 2021, **371**(6536):1379-1382.
223. Labriola JM, Miersch S, Chen G, Chen C, Pavlenco A, Saberianfar R, Caccuri F, Zani A, Sharma N, Feng A *et al*: **Peptide-Antibody Fusions Engineered by Phage Display Exhibit an Ultrapotent and Broad Neutralization of SARS-CoV-2 Variants.** *ACS Chem Biol* 2022, **17**(7):1978-1988.
224. Maas MN, Hintzen JCJ, Loffler PMG, Mecinovic J: **Targeting SARS-CoV-2 spike protein by stapled hACE2 peptides.** *Chem Commun (Camb)* 2021, **57**(26):3283-3286.
225. Stravalaci M, Pagani I, Paraboschi EM, Pedotti M, Doni A, Scavello F, Mapelli SN, Sironi M, Perucchini C, Varani L *et al*: **Recognition and inhibition of SARS-CoV-2 by humoral innate immunity pattern recognition molecules.** *Nat Immunol* 2022, **23**(2):275-286.
226. Rodriguez Y, Cardoze SM, Obineche OW, Melo C, Persaud A, Fernandez Romero JA: **Small Molecules Targeting SARS-CoV-2 Spike Glycoprotein Receptor-Binding Domain.** *ACS Omega* 2022, **7**(33):28779-28789.
227. Park SB, Irvin P, Hu Z, Khan M, Hu X, Zeng Q, Chen C, Xu M, Leek M, Zang R *et al*: **Targeting the Fusion Process of SARS-CoV-2 Infection by Small Molecule Inhibitors.** *mBio* 2022, **13**(1):e0323821.
228. Tietjen I, Cassel J, Register ET, Zhou XY, Messick TE, Keeney F, Lu LD, Beattie KD, Rali T, Tebas P *et al*: **The Natural Stilbenoid (-)-Hopeaphenol Inhibits Cellular Entry of SARS-CoV-2 USA-WA1/2020, B.1.1.7, and B.1.351 Variants.** *Antimicrob Agents Chemother* 2021, **65**(12):e0077221.
229. Kang S, Yang M, He S, Wang Y, Chen X, Chen YQ, Hong Z, Liu J, Jiang G, Chen Q *et al*: **A SARS-CoV-2 antibody curbs viral nucleocapsid protein-induced complement hyperactivation.** *Nat Commun* 2021, **12**(1):2697.
230. Zhao M, Yu Y, Sun LM, Xing JQ, Li T, Zhu Y, Wang M, Yu Y, Xue W, Xia T *et al*: **GCG inhibits SARS-CoV-2 replication by disrupting the liquid phase condensation of its nucleocapsid protein.** *Nat Commun* 2021, **12**(1):2114.
231. Ge Y, Tian T, Huang S, Wan F, Li J, Li S, Wang X, Yang H, Hong L, Wu N *et al*: **An integrative drug repositioning framework discovered a potential therapeutic agent targeting COVID-19.** *Signal Transduct Target Ther* 2021, **6**(1):165.
232. Wang YT, Long XY, Ding X, Fan SR, Cai JY, Yang BJ, Zhang XF, Luo RH, Yang L, Ruan T *et al*: **Novel nucleocapsid protein-targeting phenanthridine inhibitors of SARS-CoV-2.** *Eur J Med Chem* 2022, **227**:113966.
233. Luan X, Li X, Li Y, Su G, Yin W, Jiang Y, Xu N, Wang F, Cheng W, Jin Y *et al*: **Antiviral drug design based on structural insights into the N-terminal domain and C-terminal domain of the SARS-CoV-2 nucleocapsid protein.** *Sci Bull (Beijing)* 2022, **67**(22):2327-2335.
234. Lee JG, Huang W, Lee H, van de Leemput J, Kane MA, Han Z: **Characterization of SARS-CoV-2 proteins reveals Orf6 pathogenicity, subcellular localization, host interactions and attenuation by Selinexor.** *Cell Biosci* 2021, **11**(1):58.
235. Lin X, Ke X, Jian X, Xia L, Yang Y, Zhang T, Xiong H, Zhao B, Liu W, Chen Q *et al*: **Azacytidine targeting SARS-CoV-2 viral RNA as a potential treatment for COVID-19.** *Sci Bull (Beijing)* 2022, **67**(10):1022-1025.
236. Zhu C, Lee JY, Woo JZ, Xu L, Nguyenla X, Yamashiro LH, Ji F, Biering SB, Van Dis E, Gonzalez F *et al*: **An intranasal ASO therapeutic targeting SARS-CoV-2.** *Nat Commun* 2022, **13**(1):4503.
237. Gerber PP, Donde MJ, Matheson NJ, Taylor AI: **XNAzymes targeting the SARS-CoV-2 genome inhibit viral infection.** *Nat Commun* 2022, **13**(1):6716.
238. Chang YC, Yang CF, Chen YF, Yang CC, Chou YL, Chou HW, Chang TY, Chao TL, Hsu SC, Jeong SM *et al*: **A siRNA targets and inhibits a broad range of SARS-CoV-2 infections including Delta variant.** *EMBO Mol Med* 2022, **14**(4):e15298.
239. Zafferani M, Haddad C, Luo L, Davila-Calderon J, Chiu LY, Mugisha CS, Monaghan AG,

- Kennedy AA, Yesselman JD, Gifford RJ *et al*: **Amilorides inhibit SARS-CoV-2 replication in vitro by targeting RNA structures**. *Sci Adv* 2021, **7**(48):eabl6096.
240. Zeng L, Liu Y, Nguyenla XH, Abbott TR, Han M, Zhu Y, Chemparathy A, Lin X, Chen X, Wang H *et al*: **Broad-spectrum CRISPR-mediated inhibition of SARS-CoV-2 variants and endemic coronaviruses in vitro**. *Nat Commun* 2022, **13**(1):2766.
241. Pfafenrot C, Schneider T, Muller C, Hung LH, Schreiner S, Ziebuhr J, Bindereif A: **Inhibition of SARS-CoV-2 coronavirus proliferation by designer antisense-circRNAs**. *Nucleic Acids Res* 2021, **49**(21):12502-12516.
242. Vora SM, Fontana P, Mao T, Leger V, Zhang Y, Fu TM, Lieberman J, Gehrke L, Shi M, Wang L *et al*: **Targeting stem-loop 1 of the SARS-CoV-2 5' UTR to suppress viral translation and Nsp1 evasion**. *Proc Natl Acad Sci U S A* 2022, **119**(9):e2117198119.
243. Ambike S, Cheng CC, Feuerherd M, Velkov S, Baldassi D, Afridi SQ, Porras-Gonzalez D, Wei X, Hagen P, Kneidinger N *et al*: **Targeting genomic SARS-CoV-2 RNA with siRNAs allows efficient inhibition of viral replication and spread**. *Nucleic Acids Res* 2022, **50**(1):333-349.
244. Yao Y, Sun H, Chen Y, Tian L, Huang D, Liu C, Zhou Y, Wang Y, Wen Z, Yang B *et al*: **RBM24 inhibits the translation of SARS-CoV-2 polyproteins by targeting the 5'-untranslated region**. *Antiviral Res* 2023, **209**:105478.
245. Westendorf K, Zentelis S, Wang L, Foster D, Vaillancourt P, Wiggin M, Lovett E, van der Lee R, Hendle J, Pustilnik A *et al*: **LY-CoV1404 (bebtelovimab) potently neutralizes SARS-CoV-2 variants**. *Cell Rep* 2022, **39**(7):110812.
246. Hansen J, Baum A, Pascal KE, Russo V, Giordano S, Wloga E, Fulton BO, Yan Y, Koon K, Patel K *et al*: **Studies in humanized mice and convalescent humans yield a SARS-CoV-2 antibody cocktail**. *Science* 2020, **369**(6506):1010-1014.
247. ACTIV-3/Therapeutics for Inpatients with COVID-19 Study Group: **Efficacy and safety of two neutralising monoclonal antibody therapies, sotrovimab and BRII-196 plus BRII-198, for adults hospitalised with COVID-19 (TICO): a randomised controlled trial**. *Lancet Infect Dis* 2021, **22**(5):622-635.
248. Ju B, Zhang Q, Ge J, Wang R, Sun J, Ge X, Yu J, Shan S, Zhou B, Song S *et al*: **Human neutralizing antibodies elicited by SARS-CoV-2 infection**. *Nature* 2020, **584**(7819):115-119.
249. Ge J, Wang R, Ju B, Zhang Q, Sun J, Chen P, Zhang S, Tian Y, Shan S, Cheng L *et al*: **Antibody neutralization of SARS-CoV-2 through ACE2 receptor mimicry**. *Nat Commun* 2021, **12**(1):250.
250. Liang Q, Wang Y, Zhang S, Sun J, Sun W, Li J, Liu Y, Li M, Cheng L, Jiang Y *et al*: **RBD trimer mRNA vaccine elicits broad and protective immune responses against SARS-CoV-2 variants**. *iScience* 2022, **25**(4):104043.
251. Jones BE, Brown-Augsburger PL, Corbett KS, Westendorf K, Davies J, Cujec TP, Wiethoff CM, Blackburne JL, Heinz BA, Foster D *et al*: **The neutralizing antibody, LY-CoV555, protects against SARS-CoV-2 infection in nonhuman primates**. *Sci Transl Med* 2021, **13**(593):eabf1906.
252. Shi R, Shan C, Duan X, Chen Z, Liu P, Song J, Song T, Bi X, Han C, Wu L *et al*: **A human neutralizing antibody targets the receptor-binding site of SARS-CoV-2**. *Nature* 2020, **584**(7819):120-124.
253. Wu X, Li N, Wang G, Liu W, Yu J, Cao G, Wang J, Chen Y, Ma J, Wu J *et al*: **Tolerability, Safety, Pharmacokinetics, and Immunogenicity of a Novel SARS-CoV-2 Neutralizing Antibody, Etesevimab, in Chinese Healthy Adults: a Randomized, Double-Blind, Placebo-Controlled, First-in-Human Phase 1 Study**. *Antimicrob Agents Chemother* 2021, **65**(8):e0035021.
254. Cathcart AL, Havenar-Daughton C, Lempp FA, Ma D, Schmid MA, Agostini ML, Guarino B, Di iulio J, Rosen LE, Tucker H *et al*: **The dual function monoclonal antibodies VIR-7831 and VIR-7832 demonstrate potent in vitro and in vivo activity against SARS-CoV-2**. *bioRxiv* 2022:434607.
255. Pinto D, Park YJ, Beltramello M, Walls AC, Tortorici MA, Bianchi S, Jaconi S, Culap K, Zatta F, De Marco A *et al*: **Cross-neutralization of SARS-CoV-2 by a human monoclonal SARS-CoV antibody**. *Nature* 2020, **583**(7815):290-295.
256. Tuekprakhon A, Nutalai R, Djikajite-Guraliuc A, Zhou D, Ginn HM, Selvaraj M, Liu C, Mentzer AJ, Supasa P, Duyvesteyn HME *et al*: **Antibody escape of SARS-CoV-2 Omicron BA.4 and BA.5 from vaccine and BA.1 serum**. *Cell* 2022, **185**(14):2422-2433.e2413.
257. Loo YM, McTamney PM, Arends RH, Abram ME, Akshuk AA, Diallo S, Flores DJ, Kelly EJ, Ren K, Roque R *et al*: **The SARS-CoV-2 monoclonal antibody combination, AZD7442, is protective in non-human primates and has an extended half-life in humans**. *Sci Transl Med*

- 2022, **14**(635):eabl8124.
258. Kim C, Ryu DK, Lee J, Kim YI, Seo JM, Kim YG, Jeong JH, Kim M, Kim JI, Kim P *et al*: **A therapeutic neutralizing antibody targeting receptor binding domain of SARS-CoV-2 spike protein.** *Nat Commun* 2021, **12**(1):288.
259. Planas D, Saunders N, Maes P, Guivel-Benhassine F, Planchais C, Buchrieser J, Bolland WH, Porrot F, Staropoli I, Lemoine F *et al*: **Considerable escape of SARS-CoV-2 Omicron to antibody neutralization.** *Nature* 2021, **602**(7898):671-675.
260. Yuan M, Zhu X, He WT, Zhou P, Kaku CI, Capozzola T, Zhu CY, Yu X, Liu H, Yu W *et al*: **A broad and potent neutralization epitope in SARS-related coronaviruses.** *Proc Natl Acad Sci U S A* 2022, **119**(29):e2205784119.
261. Lanini S, Milleri S, Andreano E, Nosari S, Paciello I, Piccini G, Gentili A, Phogat A, Hyseni I, Leonardi M *et al*: **Safety and serum distribution of anti-SARS-CoV-2 monoclonal antibody MAD0004J08 after intramuscular injection.** *Nat Commun* 2022, **13**(1):2263.
262. Halwe S, Kupke A, Vanshylla K, Liberta F, Gruell H, Zehner M, Rohde C, Krahling V, Gellhorn Serra M, Kreer C *et al*: **Intranasal Administration of a Monoclonal Neutralizing Antibody Protects Mice against SARS-CoV-2 Infection.** *Viruses* 2021, **13**(8):1498.
263. Dacon C, Tucker C, Peng L, Lee CD, Lin TH, Yuan M, Cong Y, Wang L, Purser L, Williams JK *et al*: **Broadly neutralizing antibodies target the coronavirus fusion peptide.** *Science* 2022, **377**(6607):728-735.
264. Piepenbrink MS, Park JG, Oladunni FS, Deshpande A, Basu M, Sarkar S, Loos A, Woo J, Lovalenti P, Sloan D *et al*: **Therapeutic activity of an inhaled potent SARS-CoV-2 neutralizing human monoclonal antibody in hamsters.** *Cell Rep Med* 2021, **2**(3):100218.
265. Wu Y, Wang F, Shen C, Peng W, Li D, Zhao C, Li Z, Li S, Bi Y, Yang Y *et al*: **A noncompeting pair of human neutralizing antibodies block COVID-19 virus binding to its receptor ACE2.** *Science* 2020, **368**(6496):1274-1278.
266. Cao Y, Su B, Guo X, Sun W, Deng Y, Bao L, Zhu Q, Zhang X, Zheng Y, Geng C *et al*: **Potent Neutralizing Antibodies against SARS-CoV-2 Identified by High-Throughput Single-Cell Sequencing of Convalescent Patients' B Cells.** *Cell* 2020, **182**(1):73-84.e16.
267. Yao H, Sun Y, Deng YQ, Wang N, Tan Y, Zhang NN, Li XF, Kong C, Xu YP, Chen Q *et al*: **Rational development of a human antibody cocktail that deploys multiple functions to confer Pan-SARS-CoVs protection.** *Cell Res* 2021, **31**(1):25-36.
268. Lv Z, Deng YQ, Ye Q, Cao L, Sun CY, Fan C, Huang W, Sun S, Sun Y, Zhu L *et al*: **Structural basis for neutralization of SARS-CoV-2 and SARS-CoV by a potent therapeutic antibody.** *Science* 2020, **369**(6510):1505-1509.
269. Starr TN, Czudnochowski N, Liu Z, Zatta F, Park YJ, Addetia A, Pinto D, Beltramello M, Hernandez P, Greaney AJ *et al*: **SARS-CoV-2 RBD antibodies that maximize breadth and resistance to escape.** *Nature* 2021, **597**(7874):97-102.
270. Park YJ, De Marco A, Starr TN, Liu Z, Pinto D, Walls AC, Zatta F, Zepeda SK, Bowen JE, Sprouse KR *et al*: **Antibody-mediated broad sarbecovirus neutralization through ACE2 molecular mimicry.** *Science* 2022, **375**(6579):449-454.
271. Xu S, Wang Y, Wang Y, Zhang C, Hong Q, Gu C, Xu R, Wang T, Yang Y, Zang J *et al*: **Mapping cross-variant neutralizing sites on the SARS-CoV-2 spike protein.** *Emerg Microbes Infect* 2022, **11**(1):351-367.
272. Duty JA, Kraus T, Zhou H, Zhang Y, Shaabani N, Yildiz S, Du N, Singh A, Miorin L, Li D *et al*: **Discovery and intranasal administration of a SARS-CoV-2 broadly acting neutralizing antibody with activity against multiple Omicron subvariants.** *Med (N Y)* 2022, **3**(10):705-721.e711.
273. Peng L, Hu Y, Mankowski MC, Ren P, Chen RE, Wei J, Zhao M, Li T, Tripler T, Ye L *et al*: **Monospecific and bispecific monoclonal SARS-CoV-2 neutralizing antibodies that maintain potency against B.1.617.** *Nat Commun* 2022, **13**(1):1638.
274. Wang X, Hu A, Chen X, Zhang Y, Yu F, Yue S, Li A, Zhang J, Pan Z, Yang Y *et al*: **A potent human monoclonal antibody with pan-neutralizing activities directly dislocates S trimer of SARS-CoV-2 through binding both up and down forms of RBD.** *Signal Transduct Target Ther* 2022, **7**(1):114.
275. Du W, Hurdiss DL, Drabek D, Mykytyn AZ, Kaiser FK, Gonzalez-Hernandez M, Munoz-Santos D, Lamers MM, van Haperen R, Li W *et al*: **An ACE2-blocking antibody confers broad neutralization and protection against Omicron and other SARS-CoV-2 variants of concern.** *Sci Immunol* 2022, **7**(73):eabp9312.
276. Torres JL, Ozorowski G, Andreano E, Liu H, Copps J, Piccini G, Donnici L, Conti M, Planchais C, Planas D *et al*: **Structural insights of a highly potent pan-neutralizing SARS-CoV-2**

- human monoclonal antibody. *Proc Natl Acad Sci U S A* 2022, **119**(20):e2120976119.**
277. Wang Y, Liu M, Shen Y, Ma Y, Li X, Zhang Y, Liu M, Yang XL, Chen J, Yan R *et al*: **Novel sarbecovirus bispecific neutralizing antibodies with exceptional breadth and potency against currently circulating SARS-CoV-2 variants and sarbecoviruses.** *Cell Discov* 2022, **8**(1):36.
278. Onodera T, Kita S, Adachi Y, Moriyama S, Sato A, Nomura T, Sakakibara S, Inoue T, Tadokoro T, Anraku Y *et al*: **A SARS-CoV-2 antibody broadly neutralizes SARS-related coronaviruses and variants by coordinated recognition of a virus-vulnerable site.** *Immunity* 2021, **54**(10):2385-2398.e2310.
279. Sun X, Yi C, Zhu Y, Ding L, Xia S, Chen X, Liu M, Gu C, Lu X, Fu Y *et al*: **Neutralization mechanism of a human antibody with pan-coronavirus reactivity including SARS-CoV-2.** *Nat Microbiol* 2022, **7**(7):1063-1074.
280. Tanaka S, Olson CA, Barnes CO, Higashide W, Gonzalez M, Taft J, Richardson A, Martin-Fernandez M, Bogunovic D, Gnanapragasam PNP *et al*: **Rapid identification of neutralizing antibodies against SARS-CoV-2 variants by mRNA display.** *Cell Rep* 2022, **38**(6):110348.
281. Reincke SM, Yuan M, Kornau HC, Corman VM, van Hoof S, Sanchez-Sendin E, Ramberger M, Yu W, Hua Y, Tien H *et al*: **SARS-CoV-2 Beta variant infection elicits potent lineage-specific and cross-reactive antibodies.** *Science* 2022, **375**(6582):782-787.
282. Nikitin PA, DiMuzio JM, Dowling JP, Patel NB, Bingaman-Steele JL, Heimbach BC, Henriquez N, Nicolescu C, Polley A, Sikorski EL *et al*: **IMM-BCP-01, a patient-derived anti-SARS-CoV-2 antibody cocktail, is active across variants of concern including Omicron BA.1 and BA.2.** *Sci Immunol* 2022, **7**(75):eabl9943.
283. Cao Y, Wang J, Jian F, Xiao T, Song W, Yisimayi A, Huang W, Li Q, Wang P, An R *et al*: **Omicron escapes the majority of existing SARS-CoV-2 neutralizing antibodies.** *Nature* 2022, **602**(7898):657-663.
284. Rappazzo CG, Tse LV, Kaku CI, Wrapp D, Sakharkar M, Huang D, Deveau LM, Yockachonis TJ, Herbert AS, Battles MB *et al*: **Broad and potent activity against SARS-like viruses by an engineered human monoclonal antibody.** *Science* 2021, **371**(6531):823-829.
285. Liu L, Wang P, Nair MS, Yu J, Rapp M, Wang Q, Luo Y, Chan JF, Sahi V, Figueroa A *et al*: **Potent neutralizing antibodies against multiple epitopes on SARS-CoV-2 spike.** *Nature* 2020, **584**(7821):450-456.
286. Wang L, Zhou T, Zhang Y, Yang ES, Schramm CA, Shi W, Pegu A, Oloniniyi OK, Henry AR, Darko S *et al*: **Ultrapotent antibodies against diverse and highly transmissible SARS-CoV-2 variants.** *Science* 2021, **373**(6556):eabh1766.
287. Chi X, Yan R, Zhang J, Zhang G, Zhang Y, Hao M, Zhang Z, Fan P, Dong Y, Yang Y *et al*: **A neutralizing human antibody binds to the N-terminal domain of the Spike protein of SARS-CoV-2.** *Science* 2020, **369**(6504):650-655.
288. Wee AZ, Wrapp D, Herbert AS, Maurer DP, Haslwanter D, Sakharkar M, Jangra RK, Dieterle ME, Lilov A, Huang D *et al*: **Broad neutralization of SARS-related viruses by human monoclonal antibodies.** *Science* 2020, **369**(6504):731-736.
289. Robbiani DF, Gaebler C, Muecksch F, Lorenzi JCC, Wang Z, Cho A, Agudelo M, Barnes CO, Gazumyan A, Finkin S *et al*: **Convergent antibody responses to SARS-CoV-2 in convalescent individuals.** *Nature* 2020, **584**(7821):437-442.
290. Liu H, Wu NC, Yuan M, Bangaru S, Torres JL, Caniels TG, van Schooten J, Zhu X, Lee CD, Brouwer PJM *et al*: **Cross-Neutralization of a SARS-CoV-2 Antibody to a Functionally Conserved Site Is Mediated by Avidity.** *Immunity* 2020, **53**(6):1272-1280.e1275.
291. Brouwer PJM, Caniels TG, van der Straten K, Snitselaar JL, Aldon Y, Bangaru S, Torres JL, Okba NMA, Claireaux M, Kerster G *et al*: **Potent neutralizing antibodies from COVID-19 patients define multiple targets of vulnerability.** *Science* 2020, **369**(6504):643-650.
292. Wu NC, Yuan M, Liu H, Lee CD, Zhu X, Bangaru S, Torres JL, Caniels TG, Brouwer PJM, van Gils MJ *et al*: **An Alternative Binding Mode of IGHV3-53 Antibodies to the SARS-CoV-2 Receptor Binding Domain.** *Cell Rep* 2020, **33**(3):108274.
293. Zhou D, Duyvesteyn HME, Chen CP, Huang CG, Chen TH, Shih SR, Lin YC, Cheng CY, Cheng SH, Huang YC *et al*: **Structural basis for the neutralization of SARS-CoV-2 by an antibody from a convalescent patient.** *Nat Struct Mol Biol* 2020, **27**(10):950-958.
294. Piccoli L, Park YJ, Tortorici MA, Czudnochowski N, Walls AC, Beltramello M, Silacci-Fregni C, Pinto D, Rosen LE, Bowen JE *et al*: **Mapping Neutralizing and Immunodominant Sites on the SARS-CoV-2 Spike Receptor-Binding Domain by Structure-Guided High-Resolution Serology.** *Cell* 2020, **183**(4):1024-1042.e1021.
295. Vanshylla K, Fan C, Wunsch M, Poopalasingam N, Meijers M, Kreer C, Kleipass F, Ruchnewitz



- D, Ercanoglu MS, Gruell H *et al*: **Discovery of ultrapotent broadly neutralizing antibodies from SARS-CoV-2 elite neutralizers.** *Cell Host Microbe* 2022, **30**(1):69-82.e10.
296. Yin W, Xu Y, Xu P, Cao X, Wu C, Gu C, He X, Wang X, Huang S, Yuan Q *et al*: **Structures of the Omicron Spike trimer with ACE2 and an anti-Omicron antibody.** *Science* 2022, **375**(6584):eabn8863.
297. Zhou P, Yuan M, Song G, Beutler N, Shaabani N, Huang D, He WT, Zhu X, Callaghan S, Yong P *et al*: **A human antibody reveals a conserved site on beta-coronavirus spike proteins and confers protection against SARS-CoV-2 infection.** *Sci Transl Med* 2022, **14**(637):eabi9215.
298. Cerutti G, Rapp M, Guo Y, Bahna F, Bimela J, Reddem ER, Yu J, Wang P, Liu L, Huang Y *et al*: **Structural basis for accommodation of emerging B.1.351 and B.1.1.7 variants by two potent SARS-CoV-2 neutralizing antibodies.** *Structure* 2021, **29**(7):655-663.e654.
299. Martinez DR, Schafer A, Gobeil S, Li D, De la Cruz G, Parks R, Lu X, Barr M, Stalls V, Janowska K *et al*: **A broadly cross-reactive antibody neutralizes and protects against sarbecovirus challenge in mice.** *Sci Transl Med* 2022, **14**(629):eabj7125.
300. Wu WL, Chiang CY, Lai SC, Yu CY, Huang YL, Liao HC, Liao CL, Chen HW, Liu SJ: **Monoclonal antibody targeting the conserved region of the SARS-CoV-2 spike protein to overcome viral variants.** *JCI Insight* 2022, **7**(8):e157597.
301. Lai GC, Chao TL, Lin SY, Kao HC, Tsai YM, Lu DC, Chiang YW, Chang SY, Chang SC: **Neutralization or enhancement of SARS-CoV-2 infection by a monoclonal antibody targeting a specific epitope in the spike receptor-binding domain.** *Antiviral Res* 2022, **200**:105290.
302. Wang P, Casner RG, Nair MS, Yu J, Guo Y, Wang M, Chan JF, Cerutti G, Iketani S, Liu L *et al*: **A monoclonal antibody that neutralizes SARS-CoV-2 variants, SARS-CoV, and other sarbecoviruses.** *Emerg Microbes Infect* 2022, **11**(1):147-157.
303. Windsor IW, Tong P, Lavidor O, Sanjari Moghaddam A, McKay LGA, Gautam A, Chen Y, MacDonald EA, Yoo DK, Griffiths A *et al*: **Antibodies induced by ancestral SARS-CoV-2 strain that cross-neutralize variants from Alpha to Omicron BA.1.** *Sci Immunol* 2022, **7**(74):eabo3425.
304. Muecksch F, Weisblum Y, Barnes CO, Schmidt F, Schaefer-Babajew D, Wang Z, JC CL, Flyak AI, DeLaitch AT, Huey-Tubman KE *et al*: **Affinity maturation of SARS-CoV-2 neutralizing antibodies confers potency, breadth, and resilience to viral escape mutations.** *Immunity* 2021, **54**(8):1853-1868.e1857.
305. Dejnirattisai W, Zhou D, Supasa P, Liu C, Mentzer AJ, Ginn HM, Zhao Y, Duyvesteyn HME, Tuekprakhon A, Nutalai R *et al*: **Antibody evasion by the P.1 strain of SARS-CoV-2.** *Cell* 2021, **184**(11):2939-2954.e2939.
306. Rujas E, Kucharska I, Tan YZ, Benlekbir S, Cui H, Zhao T, Wasney GA, Budyłowski P, Guvenc F, Newton JC *et al*: **Multivalency transforms SARS-CoV-2 antibodies into ultrapotent neutralizers.** *Nat Commun* 2021, **12**(1):3661.
307. Qiang M, Ma P, Li Y, Liu H, Harding A, Min C, Wang F, Liu L, Yuan M, Ji Q *et al*: **Neutralizing Antibodies to SARS-CoV-2 Selected from a Human Antibody Library Constructed Decades Ago.** *Adv Sci (Weinh)* 2022, **9**(1):e2102181.
308. Zhang Q, Ju B, Ge J, Chan JF, Cheng L, Wang R, Huang W, Fang M, Chen P, Zhou B *et al*: **Potent and protective IGHV3-53/3-66 public antibodies and their shared escape mutant on the spike of SARS-CoV-2.** *Nat Commun* 2021, **12**(1):4210.
309. Nutalai R, Zhou D, Tuekprakhon A, Ginn HM, Supasa P, Liu C, Huo J, Mentzer AJ, Duyvesteyn HME, Djokaite-Guraliuc A *et al*: **Potent cross-reactive antibodies following Omicron breakthrough in vaccinees.** *Cell* 2022, **185**(12):2116-2131.e2118.
310. Nabel KG, Clark SA, Shankar S, Pan J, Clark LE, Yang P, Coscia A, McKay LGA, Varnum HH, Brusica V *et al*: **Structural basis for continued antibody evasion by the SARS-CoV-2 receptor binding domain.** *Science* 2022, **375**(6578):eabl6251.
311. Guo H, Gao Y, Li T, Li T, Lu Y, Zheng L, Liu Y, Yang T, Luo F, Song S *et al*: **Structures of Omicron spike complexes and implications for neutralizing antibody development.** *Cell Rep* 2022, **39**(5):110770.
312. Liu C, Zhou D, Nutalai R, Duyvesteyn HME, Tuekprakhon A, Ginn HM, Dejnirattisai W, Supasa P, Mentzer AJ, Wang B *et al*: **The antibody response to SARS-CoV-2 Beta underscores the antigenic distance to other variants.** *Cell Host Microbe* 2022, **30**(1):53-68.e12.
313. Uraki R, Kiso M, Imai M, Yamayoshi S, Ito M, Fujisaki S, Takashita E, Ujie M, Furusawa Y, Yasuhara A *et al*: **Therapeutic efficacy of monoclonal antibodies and antivirals against SARS-CoV-2 Omicron BA.1 in Syrian hamsters.** *Nat Microbiol* 2022, **7**(8):1252-1258.

314. Suryadevara N, Shiakolas AR, VanBlargan LA, Binshtein E, Chen RE, Case JB, Kramer KJ, Armstrong EC, Myers L, Trivette A *et al*: **An antibody targeting the N-terminal domain of SARS-CoV-2 disrupts the spike trimer.** *J Clin Invest* 2022, **132**(11):e159062.
315. Fenwick C, Turelli P, Ni D, Perez L, Lau K, Herate C, Marlin R, Lana E, Pellaton C, Raclot C *et al*: **Patient-derived monoclonal antibody neutralizes SARS-CoV-2 Omicron variants and confers full protection in monkeys.** *Nat Microbiol* 2022, **7**(9):1376-1389.
316. Low JS, Jerak J, Tortorici MA, McCallum M, Pinto D, Cassotta A, Foglierini M, Mele F, Abdelnabi R, Weynand B *et al*: **ACE2-binding exposes the SARS-CoV-2 fusion peptide to broadly neutralizing coronavirus antibodies.** *Science* 2022, **377**(6607):735-742.
317. Barnes CO, Jette CA, Abernathy ME, Dam KA, Esswein SR, Gristick HB, Malyutin AG, Sharaf NG, Huey-Tubman KE, Lee YE *et al*: **SARS-CoV-2 neutralizing antibody structures inform therapeutic strategies.** *Nature* 2020, **588**(7839):682-687.
318. Hurlburt NK, Seydoux E, Wan YH, Edara VV, Stuart AB, Feng J, Suthar MS, McGuire AT, Stamatatos L, Pancera M: **Structural basis for potent neutralization of SARS-CoV-2 and role of antibody affinity maturation.** *Nat Commun* 2020, **11**(1):5413.
319. Kreye J, Reincke SM, Kornau HC, Sanchez-Sendin E, Corman VM, Liu H, Yuan M, Wu NC, Zhu X, Lee CD *et al*: **A Therapeutic Non-self-reactive SARS-CoV-2 Antibody Protects from Lung Pathology in a COVID-19 Hamster Model.** *Cell* 2020, **183**(4):1058-1069 e1019.
320. Asarnow D, Wang B, Lee WH, Hu Y, Huang CW, Faust B, Ng PML, Ngoh EZX, Bohn M, Bulkley D *et al*: **Structural insight into SARS-CoV-2 neutralizing antibodies and modulation of syncytia.** *Cell* 2021, **184**(12):3192-3204.e3116.
321. Fedry J, Hurdiss DL, Wang C, Li W, Obal G, Drulyte I, Du W, Howes SC, van Kuppeveld FJM, Forster F *et al*: **Structural insights into the cross-neutralization of SARS-CoV and SARS-CoV-2 by the human monoclonal antibody 47D11.** *Sci Adv* 2021, **7**(23):eabf5632.
322. Scheid JF, Barnes CO, Eraslan B, Hudak A, Keeffe JR, Cosimi LA, Brown EM, Muecksch F, Weisblum Y, Zhang S *et al*: **B cell genomics behind cross-neutralization of SARS-CoV-2 variants and SARS-CoV.** *Cell* 2021, **184**(12):3205-3221.e3224.
323. Rogers TF, Zhao F, Huang D, Beutler N, Burns A, He WT, Limbo O, Smith C, Song G, Woehl J *et al*: **Isolation of potent SARS-CoV-2 neutralizing antibodies and protection from disease in a small animal model.** *Science* 2020, **369**(6506):956-963.
324. Yuan M, Liu H, Wu NC, Lee CD, Zhu X, Zhao F, Huang D, Yu W, Hua Y, Tien H *et al*: **Structural basis of a shared antibody response to SARS-CoV-2.** *Science* 2020, **369**(6507):1119-1123.
325. Zhan W, Tian X, Zhang X, Xing S, Song W, Liu Q, Hao A, Hu Y, Zhang M, Ying T *et al*: **Structural Study of SARS-CoV-2 Antibodies Identifies a Broad-Spectrum Antibody That Neutralizes the Omicron Variant by Disassembling the Spike Trimer.** *J Virol* 2022, **96**(16):e0048022.
326. Zhang X, Zhang H, Li T, Chen S, Luo F, Zhou J, Zheng P, Song S, Wu Y, Jin T *et al*: **A potent neutralizing antibody provides protection against SARS-CoV-2 Omicron and Delta variants via nasal delivery.** *Signal Transduct Target Ther* 2022, **7**(1):301.
327. Li X, Pan Y, Yin Q, Wang Z, Shan S, Zhang L, Yu J, Qu Y, Sun L, Gui F *et al*: **Structural basis of a two-antibody cocktail exhibiting highly potent and broadly neutralizing activities against SARS-CoV-2 variants including diverse Omicron sublineages.** *Cell Discov* 2022, **8**(1):87.
328. Weidenbacher PA, Waltari E, de Los Rios Kobara I, Bell BN, Morris MK, Cheng YC, Hanson C, Pak JE, Kim PS: **Converting non-neutralizing SARS-CoV-2 antibodies into broad-spectrum inhibitors.** *Nat Chem Biol* 2022, **18**(11):1270-1276.
329. Kumar S, Patel A, Lai L, Chakravarthy C, Valanparambil R, Reddy ES, Gottimukkala K, Davis-Gardner ME, Edara VV, Linderman S *et al*: **Structural insights for neutralization of Omicron variants BA.1, BA.2, BA.4, and BA.5 by a broadly neutralizing SARS-CoV-2 antibody.** *Sci Adv* 2022, **8**(40):eadd2032.
330. Shiakolas AR, Kramer KJ, Johnson NV, Wall SC, Suryadevara N, Wrapp D, Periasamy S, Pilewski KA, Raju N, Nargi R *et al*: **Efficient discovery of SARS-CoV-2-neutralizing antibodies via B cell receptor sequencing and ligand blocking.** *Nat Biotechnol* 2022, **40**(8):1270-1275.
331. Wang F, Li L, Dou Y, Shi R, Duan X, Liu H, Zhang J, Liu D, Wu J, He Y *et al*: **Etesevimab in combination with JS026 neutralizing SARS-CoV-2 and its variants.** *Emerg Microbes Infect* 2022, **11**(1):548-551.
332. Milazzo FM, Chaves-Sanjuan A, Minenkova O, Santapaola D, Anastasi AM, Battistuzzi G, Chiapparino C, Rosi A, Merlo Pich E, Albertoni C *et al*: **Spike mutation resilient scFv76**

- antibody counteracts SARS-CoV-2 lung damage upon aerosol delivery.** *Mol Ther* 2023, **31**(2):362-373.
333. Seo JM, Kang B, Song R, Noh H, Kim C, Kim JI, Kim M, Ryu DK, Lee MH, Yang JS *et al*: **Preclinical assessment and randomized Phase I study of CT-P63, a broadly neutralizing antibody targeting severe acute respiratory syndrome coronavirus 2 (SARS-CoV-2).** *Emerg Microbes Infect* 2022, **11**(1):2315-2325.
334. Wang Y, Zhan W, Liu J, Wang Y, Zhang X, Zhang M, Han L, Ma Y, Lu L, Wen Y *et al*: **A broadly neutralizing antibody against SARS-CoV-2 Omicron variant infection exhibiting a novel trimer dimer conformation in spike protein binding.** *Cell Res* 2022, **32**(9):862-865.
335. Park YJ, Pinto D, Walls AC, Liu Z, De Marco A, Benigni F, Zatta F, Silacci-Fregni C, Bassi J, Sprouse KR *et al*: **Imprinted antibody responses against SARS-CoV-2 Omicron sublineages.** *Science* 2022, **378**(6620):619-627.
336. He P, Liu B, Gao X, Yan Q, Pei R, Sun J, Chen Q, Hou R, Li Z, Zhang Y *et al*: **SARS-CoV-2 Delta and Omicron variants evade population antibody response by mutations in a single spike epitope.** *Nat Microbiol* 2022, **7**(10):1635-1649.
337. Huo J, Zhao Y, Ren J, Zhou D, Duyvesteyn HME, Ginn HM, Carrique L, Malinauskas T, Ruza RR, Shah PNM *et al*: **Neutralization of SARS-CoV-2 by Destruction of the Prefusion Spike.** *Cell Host Microbe* 2020, **28**(3):497.
338. Tortorici MA, Beltramello M, Lempp FA, Pinto D, Dang HV, Rosen LE, McCallum M, Bowen J, Minola A, Jaconi S *et al*: **Ultrapotent human antibodies protect against SARS-CoV-2 challenge via multiple mechanisms.** *Science* 2020, **370**(6519):950-957.
339. VanBlargan LA, Adams LJ, Liu Z, Chen RE, Gilchuk P, Raju S, Smith BK, Zhao H, Case JB, Winkler ES *et al*: **A potently neutralizing SARS-CoV-2 antibody inhibits variants of concern by utilizing unique binding residues in a highly conserved epitope.** *Immunity* 2021, **54**(10):2399-2416.e2396.
340. Chen Y, Zhang YN, Yan R, Wang G, Zhang Y, Zhang ZR, Li Y, Ou J, Chu W, Liang Z *et al*: **ACE2-targeting monoclonal antibody as potent and broad-spectrum coronavirus blocker.** *Signal Transduct Target Ther* 2021, **6**(1):315.
341. Li Z, Li S, Zhang G, Peng W, Chang Z, Zhang X, Fan Z, Chai Y, Wang F, Zhao X *et al*: **An engineered bispecific human monoclonal antibody against SARS-CoV-2.** *Nat Immunol* 2022, **23**(3):423-430.
342. Bertoglio F, Fuhner V, Ruschig M, Heine PA, Abassi L, Klunemann T, Rand U, Meier D, Langreder N, Steinke S *et al*: **A SARS-CoV-2 neutralizing antibody selected from COVID-19 patients binds to the ACE2-RBD interface and is tolerant to most known RBD mutations.** *Cell Rep* 2021, **36**(4):109433.
343. Zhou B, Zhou R, Tang B, Chan JF, Luo M, Peng Q, Yuan S, Liu H, Mok BW, Chen B *et al*: **A broadly neutralizing antibody protects Syrian hamsters against SARS-CoV-2 Omicron challenge.** *Nat Commun* 2022, **13**(1):3589.
344. Leonard EK, Aller Pellitero M, Juelg B, Spangler JB, Arroyo-Curras N: **Antibody-Invertase Fusion Protein Enables Quantitative Detection of SARS-CoV-2 Antibodies Using Widely Available Glucometers.** *J Am Chem Soc* 2022, **144**(25):11226-11237.
345. Liu L, Iketani S, Guo Y, Reddem ER, Casner RG, Nair MS, Yu J, Chan JF, Wang M, Cerutti G *et al*: **An antibody class with a common CDRH3 motif broadly neutralizes sarbecoviruses.** *Sci Transl Med* 2022, **14**(646):eabn6859.
346. Jette CA, Cohen AA, Gnanapragasam PNP, Muecksch F, Lee YE, Huey-Tubman KE, Schmidt F, Hatzioannou T, Bieniasz PD, Nussenzweig MC *et al*: **Broad cross-reactivity across sarbecoviruses exhibited by a subset of COVID-19 donor-derived neutralizing antibodies.** *Cell Rep* 2021, **36**(13):109760.
347. Wang S, Wang J, Yu X, Jiang W, Chen S, Wang R, Wang M, Jiao S, Yang Y, Wang W *et al*: **Antibody-dependent enhancement (ADE) of SARS-CoV-2 pseudoviral infection requires FcγRIIB and virus-antibody complex with bivalent interaction.** *Commun Biol* 2022, **5**(1):262.
348. Zhang C, Wang Y, Zhu Y, Liu C, Gu C, Xu S, Wang Y, Zhou Y, Wang Y, Han W *et al*: **Development and structural basis of a two-MAb cocktail for treating SARS-CoV-2 infections.** *Nat Commun* 2021, **12**(1):264.
349. Ozawa T, Tani H, Anraku Y, Kita S, Igarashi E, Saga Y, Inasaki N, Kawasuji H, Yamada H, Sasaki SI *et al*: **Novel super-neutralizing antibody UT28K is capable of protecting against infection from a wide variety of SARS-CoV-2 variants.** *MAbs* 2022, **14**(1):2072455.
350. Song D, Wang W, Dong C, Ning Z, Liu X, Liu C, Du G, Sha C, Wang K, Lu J *et al*: **Structure and function analysis of a potent human neutralizing antibody CA521(FALA) against**

- SARS-CoV-2.** *Commun Biol* 2021, **4**(1):500.
351. Miersch S, Li Z, Saberianfar R, Ustav M, Brett Case J, Blazer L, Chen C, Ye W, Pavlenco A, Gorelik M *et al*: **Tetravalent SARS-CoV-2 Neutralizing Antibodies Show Enhanced Potency and Resistance to Escape Mutations.** *J Mol Biol* 2021, **433**(19):167177.
352. Nie J, Xie J, Liu S, Wu J, Liu C, Li J, Liu Y, Wang M, Zhao H, Zhang Y *et al*: **Three epitope-distinct human antibodies from RenMab mice neutralize SARS-CoV-2 and cooperatively minimize the escape of mutants.** *Cell Discov* 2021, **7**(1):53.
353. Luczkowiak J, Radreau P, Nguyen L, Labiod N, Lasala F, Veas F, Herbreteau CH, Delgado R: **Potent Neutralizing Activity of Polyclonal Equine Antibodies against SARS-CoV-2 Variants of Concern.** *J Infect Dis* 2022, **227**(1):35-39.
354. Liu C, Ginn HM, Dejnirattisai W, Supasa P, Wang B, Tuekprakhon A, Nutalai R, Zhou D, Mentzer AJ, Zhao Y *et al*: **Reduced neutralization of SARS-CoV-2 B.1.617 by vaccine and convalescent serum.** *Cell* 2021, **184**(16):4220-4236.e4213.
355. Dacon C, Peng L, Lin TH, Tucker C, Lee CD, Cong Y, Wang L, Purser L, Cooper AJR, Williams JK *et al*: **Rare, convergent antibodies targeting the stem helix broadly neutralize diverse betacoronaviruses.** *Cell Host Microbe* 2023, **31**(1):97-111.e112.
356. Chen Z, Zhang P, Matsuoka Y, Tsybovsky Y, West K, Santos C, Boyd LF, Nguyen H, Pomeranke A, Stephens T *et al*: **Potent monoclonal antibodies neutralize Omicron sublineages and other SARS-CoV-2 variants.** *Cell Rep* 2022, **41**(5):111528.
357. Parray HA, Narayanan N, Garg S, Rizvi ZA, Shrivastava T, Kushwaha S, Singh J, Murugavelu P, Anantharaj A, Mehdi F *et al*: **A broadly neutralizing monoclonal antibody overcomes the mutational landscape of emerging SARS-CoV-2 variants of concern.** *PLoS Pathog* 2022, **18**(12):e1010994.
358. Li W, Chen Y, Prevost J, Ullah I, Lu M, Gong SY, Tauzin A, Gasser R, Vezina D, Anand SP *et al*: **Structural basis and mode of action for two broadly neutralizing antibodies against SARS-CoV-2 emerging variants of concern.** *Cell Rep* 2022, **38**(2):110210.
359. Fang Y, Sun P, Xie X, Du M, Du F, Ye J, Kalveram BK, Plante JA, Plante KS, Li B *et al*: **An antibody that neutralizes SARS-CoV-1 and SARS-CoV-2 by binding to a conserved spike epitope outside the receptor binding motif.** *Sci Immunol* 2022, **7**(76):eabp9962.
360. Zhang L, Narayanan KK, Cooper L, Chan KK, Skeeters SS, Devlin CA, Aguhob A, Shirley K, Rong L, Rehman J *et al*: **An ACE2 decoy can be administered by inhalation and potently targets omicron variants of SARS-CoV-2.** *EMBO Mol Med* 2022, **14**(11):e16109.
361. Ku Z, Xie X, Lin J, Gao P, Wu B, El Sahili A, Su H, Liu Y, Ye X, Tan EY *et al*: **Engineering SARS-CoV-2 specific cocktail antibodies into a bispecific format improves neutralizing potency and breadth.** *Nat Commun* 2022, **13**(1):5552.
362. Koenig PA, Das H, Liu H, Kummerer BM, Gohr FN, Jenster LM, Schiffelers LDJ, Tesfamariam YM, Uchima M, Wuerth JD *et al*: **Structure-guided multivalent nanobodies block SARS-CoV-2 infection and suppress mutational escape.** *Science* 2021, **371**(6530):eabe6230.
363. Schoof M, Faust B, Saunders RA, Sangwan S, Rezelj V, Hoppe N, Boone M, Billesbolle CB, Puchades C, Azumaya CM *et al*: **An ultrapotent synthetic nanobody neutralizes SARS-CoV-2 by stabilizing inactive Spike.** *Science* 2020, **370**(6523):1473-1479.
364. Custodio TF, Das H, Sheward DJ, Hanke L, Paziicky S, Pieprzyk J, Sorgenfrei M, Schroer MA, Gruzinov AY, Jeffries CM *et al*: **Selection, biophysical and structural analysis of synthetic nanobodies that effectively neutralize SARS-CoV-2.** *Nat Commun* 2020, **11**(1):5588.
365. Huo J, Le Bas A, Ruza RR, Duyvesteyn HME, Mikolajek H, Malinauskas T, Tan TK, Rijal P, Dumoux M, Ward PN *et al*: **Neutralizing nanobodies bind SARS-CoV-2 spike RBD and block interaction with ACE2.** *Nat Struct Mol Biol* 2020, **27**(9):846-854.
366. Walter JD, Scherer M, Hutter CAJ, Garaeva AA, Zimmermann I, Wyss M, Rheinberger J, Ruedin Y, Earp JC, Egloff P *et al*: **Biparatopic sybodies neutralize SARS-CoV-2 variants of concern and mitigate drug resistance.** *EMBO Rep* 2022, **23**(4):e54199.
367. Hanke L, Vidakovics Perez L, Sheward DJ, Das H, Schulte T, Moliner-Morro A, Corcoran M, Achour A, Karlsson Hedestam GB, Hallberg BM *et al*: **An alpaca nanobody neutralizes SARS-CoV-2 by blocking receptor interaction.** *Nat Commun* 2020, **11**(1):4420.
368. Xiang Y, Nambulli S, Xiao Z, Liu H, Sang Z, Duprex WP, Schneidman-Duhovny D, Zhang C, Shi Y: **Versatile and multivalent nanobodies efficiently neutralize SARS-CoV-2.** *Science* 2020, **370**(6523):1479-1484.
369. Shi Z, Li X, Wang L, Sun Z, Zhang H, Chen X, Cui Q, Qiao H, Lan Z, Zhang X *et al*: **Structural basis of nanobodies neutralizing SARS-CoV-2 variants.** *Structure* 2022, **30**(5):707-720.e705.
370. Hong J, Kwon HJ, Cachau R, Chen CZ, Butay KJ, Duan Z, Li D, Ren H, Liang T, Zhu J *et al*: **Dromedary camel nanobodies broadly neutralize SARS-CoV-2 variants.** *Proc Natl Acad*

- Sci U S A* 2022, **119**(18):e2201433119.
371. Huo J, Mikolajek H, Le Bas A, Clark JJ, Sharma P, Kipar A, Dormon J, Norman C, Weckener M, Clare DK *et al*: **A potent SARS-CoV-2 neutralising nanobody shows therapeutic efficacy in the Syrian golden hamster model of COVID-19.** *Nat Commun* 2021, **12**(1):5469.
372. Wu X, Rapoport TA: **Cryo-EM structure determination of small proteins by nanobody-binding scaffolds (Legobodies).** *Proc Natl Acad Sci U S A* 2021, **118**(41):e2115001118.
373. Li T, Zhou B, Li Y, Huang S, Luo Z, Zhou Y, Lai Y, Gautam A, Bourgeau S, Wang S *et al*: **Isolation, characterization, and structure-based engineering of a neutralizing nanobody against SARS-CoV-2.** *Int J Biol Macromol* 2022, **209**(Pt A):1379-1388.
374. Xu J, Xu K, Jung S, Conte A, Lieberman J, Muecksch F, Lorenzi JCC, Park S, Schmidt F, Wang Z *et al*: **Nanobodies from camelid mice and llamas neutralize SARS-CoV-2 variants.** *Nature* 2021, **595**(7866):278-282.
375. Pymm P, Adair A, Chan LJ, Cooney JP, Mordant FL, Allison CC, Lopez E, Haycroft ER, O'Neill MT, Tan LL *et al*: **Nanobody cocktails potently neutralize SARS-CoV-2 D614G N501Y variant and protect mice.** *Proc Natl Acad Sci U S A* 2021, **118**(19):e2101918118.
376. Yang M, Li J, Huang Z, Li H, Wang Y, Wang X, Kang S, Huang X, Wu C, Liu T *et al*: **Structural Basis of a Human Neutralizing Antibody Specific to the SARS-CoV-2 Spike Protein Receptor-Binding Domain.** *Microbiol Spectr* 2021, **9**(2):e0135221.
377. Ye G, Gallant J, Zheng J, Massey C, Shi K, Tai W, Odle A, Vickers M, Shang J, Wan Y *et al*: **The development of Nanosota-1 as anti-SARS-CoV-2 nanobody drug candidates.** *Elife* 2021, **10**:e64815.
378. Ma H, Zhang X, Zeng W, Zhou J, Chi X, Chen S, Zheng P, Wang M, Wu Y, Zhao D *et al*: **A bispecific nanobody dimer broadly neutralizes SARS-CoV-1 & 2 variants of concern and offers substantial protection against Omicron via low-dose intranasal administration.** *Cell Discov* 2022, **8**(1):132.
379. Ma H, Zhang X, Zheng P, Dube PH, Zeng W, Chen S, Cheng Q, Yang Y, Wu Y, Zhou J *et al*: **Hetero-bivalent nanobodies provide broad-spectrum protection against SARS-CoV-2 variants of concern including Omicron.** *Cell Res* 2022, **32**(9):831-842.
380. Xiong H, Sun H, Wang S, Yuan L, Liu L, Zhu Y, Zhang J, Huang Y, Qi R, Jiang Y *et al*: **The neutralizing breadth of antibodies targeting diverse conserved epitopes between SARS-CoV and SARS-CoV-2.** *Proc Natl Acad Sci U S A* 2022, **119**(34):e2204256119.
381. Liu Z, Xu W, Chen Z, Fu W, Zhan W, Gao Y, Zhou J, Zhou Y, Wu J, Wang Q *et al*: **An ultrapotent pan-beta-coronavirus lineage B (beta-CoV-B) neutralizing antibody locks the receptor-binding domain in closed conformation by targeting its conserved epitope.** *Protein Cell* 2022, **13**(9):655-675.
382. Luo M, Zhou B, Reddem ER, Tang B, Chen B, Zhou R, Liu H, Liu L, Katsamba PS, Au KK *et al*: **Structural insights into broadly neutralizing antibodies against SARS-CoV-2 elicited by hybrid immunity.** *Emerg Microbes Infect* 2023, **12**(1):2146538.
383. Tang J, Grubbs G, Lee Y, Wu H, Luke TC, Eglund KA, Bausch CL, Sullivan EJ, Khurana S: **Increased antibody avidity and cross-neutralization of SARS-CoV-2 variants by hyperimmunized Tc-Bovine derived human immunoglobulins for treatment of COVID-19.** *J Infect Dis* 2022, **226**(4):655-663.
384. Gaborit B, Dailly E, Vanhove B, Josien R, Lacombe K, Dubee V, Ferre V, Brouard S, Ader F, Vibet MA *et al*: **Pharmacokinetics and Safety of XAV-19, a Swine Glyco-humanized Polyclonal Anti-SARS-CoV-2 Antibody, for COVID-19-Related Moderate Pneumonia: a Randomized, Double-Blind, Placebo-Controlled, Phase IIa Study.** *Antimicrob Agents Chemother* 2021, **65**(9):e0123721.
385. Barnes CO, West AP, Jr., Huey-Tubman KE, Hoffmann MAG, Sharaf NG, Hoffman PR, Koranda N, Gristick HB, Gaebler C, Muecksch F *et al*: **Structures of Human Antibodies Bound to SARS-CoV-2 Spike Reveal Common Epitopes and Recurrent Features of Antibodies.** *Cell* 2020, **182**(4):828-842.e816.
386. Li C, Zhan W, Yang Z, Tu C, Hu G, Zhang X, Song W, Du S, Zhu Y, Huang K *et al*: **Broad neutralization of SARS-CoV-2 variants by an inhalable bispecific single-domain antibody.** *Cell* 2022, **185**(8):1389-1401.e1318.
387. Li T, Xue W, Zheng Q, Song S, Yang C, Xiong H, Zhang S, Hong M, Zhang Y, Yu H *et al*: **Cross-neutralizing antibodies bind a SARS-CoV-2 cryptic site and resist circulating variants.** *Nat Commun* 2021, **12**(1):5652.
388. Wang K, Jia Z, Bao L, Wang L, Cao L, Chi H, Hu Y, Li Q, Zhou Y, Jiang Y *et al*: **Memory B cell repertoire from triple vaccinees against diverse SARS-CoV-2 variants.** *Nature* 2022, **603**(7903):919-925.

389. Luo S, Zhang J, Kreuzberger AJB, Eaton A, Edwards RJ, Jing C, Dai HQ, Sempowski GD, Cronin K, Parks R *et al*: **An Antibody from Single Human VH-rearranging Mouse Neutralizes All SARS-CoV-2 Variants Through BA.5 by Inhibiting Membrane Fusion.** *Sci Immunol* 2022, **7**(76):eadd5446.
390. Burnett DL, Jackson KJL, Langley DB, Aggrawal A, Stella AO, Johansen MD, Balachandran H, Lenthall H, Rouet R, Walker G *et al*: **Immunizations with diverse sarbecovirus receptor-binding domains elicit SARS-CoV-2 neutralizing antibodies against a conserved site of vulnerability.** *Immunity* 2021, **54**(12):2908-2921.e2906.
391. Banach BB, Cerutti G, Fahad AS, Shen CH, Oliveira De Souza M, Katsamba PS, Tsybovsky Y, Wang P, Nair MS, Huang Y *et al*: **Paired heavy- and light-chain signatures contribute to potent SARS-CoV-2 neutralization in public antibody responses.** *Cell Rep* 2021, **37**(1):109771.
392. Yuan M, Chen X, Zhu Y, Dong X, Liu Y, Qian Z, Ye L, Liu P: **A Bispecific Antibody Targeting RBD and S2 Potently Neutralizes SARS-CoV-2 Omicron and Other Variants of Concern.** *J Virol* 2022, **96**(16):e0077522.
393. Hanke L, Das H, Sheward DJ, Perez Vidakovics L, Urgard E, Moliner-Morro A, Kim C, Karl V, Pankow A, Smith NL *et al*: **A bispecific monomeric nanobody induces spike trimer dimers and neutralizes SARS-CoV-2 in vivo.** *Nat Commun* 2022, **13**(1):155.
394. Liu H, Yuan M, Huang D, Bangaru S, Zhao F, Lee CD, Peng L, Barman S, Zhu X, Nemazee D *et al*: **A combination of cross-neutralizing antibodies synergizes to prevent SARS-CoV-2 and SARS-CoV pseudovirus infection.** *Cell Host Microbe* 2021, **29**(5):806-818 e806.
395. Hingankar N, Deshpande S, Das P, Rizvi ZA, Wibmer CK, Mashilo P, Ansari MY, Burns A, Barman S, Zhao F *et al*: **A combination of potently neutralizing monoclonal antibodies isolated from an Indian convalescent donor protects against the SARS-CoV-2 Delta variant.** *PLoS Pathog* 2022, **18**(4):e1010465.
396. Beaudoin-Bussieres G, Chen Y, Ullah I, Prevost J, Tolbert WD, Symmes K, Ding S, Benlarbi M, Gong SY, Tauzin A *et al*: **A Fc-enhanced NTD-binding non-neutralizing antibody delays virus spread and synergizes with a nAb to protect mice from lethal SARS-CoV-2 infection.** *Cell Rep* 2022, **38**(7):110368.
397. Yao H, Cai H, Li T, Zhou B, Qin W, Lavillette D, Li D: **A high-affinity RBD-targeting nanobody improves fusion partner's potency against SARS-CoV-2.** *PLoS Pathog* 2021, **17**(3):e1009328.
398. Duan X, Shi R, Liu P, Huang Q, Wang F, Chen X, Feng H, Huang W, Xiao J, Yan J: **A non-ACE2-blocking neutralizing antibody against Omicron-included SARS-CoV-2 variants.** *Signal Transduct Target Ther* 2022, **7**(1):23.
399. Wu X, Cheng L, Fu M, Huang B, Zhu L, Xu S, Shi H, Zhang D, Yuan H, Nawaz W *et al*: **A potent bispecific nanobody protects hACE2 mice against SARS-CoV-2 infection via intranasal administration.** *Cell Rep* 2021, **37**(3):109869.
400. Guo Y, Huang L, Zhang G, Yao Y, Zhou H, Shen S, Shen B, Li B, Li X, Zhang Q *et al*: **A SARS-CoV-2 neutralizing antibody with extensive Spike binding coverage and modified for optimal therapeutic outcomes.** *Nat Commun* 2021, **12**(1):2623.
401. Li T, Cai H, Yao H, Zhou B, Zhang N, van Vlissingen MF, Kuiken T, Han W, GeurtsvanKessel CH, Gong Y *et al*: **A synthetic nanobody targeting RBD protects hamsters from SARS-CoV-2 infection.** *Nat Commun* 2021, **12**(1):4635.
402. Schepens B, van Schie L, Nerinckx W, Roose K, Van Breedam W, Fijalkowska D, Devos S, Weyts W, De Cae S, Vanmarcke S *et al*: **An affinity-enhanced, broadly neutralizing heavy chain-only antibody protects against SARS-CoV-2 infection in animal models.** *Sci Transl Med* 2021, **13**(621):eabi7826.
403. Pinto D, Sauer MM, Czudnochowski N, Low JS, Tortorici MA, Housley MP, Noack J, Walls AC, Bowen JE, Guarino B *et al*: **Broad betacoronavirus neutralization by a stem helix-specific human antibody.** *Science* 2021, **373**(6559):1109-1116.
404. Guo Y, Kawaguchi A, Takeshita M, Sekiya T, Hirohama M, Yamashita A, Siomi H, Murano K: **Potent mouse monoclonal antibodies that block SARS-CoV-2 infection.** *J Biol Chem* 2021, **296**:100346.
405. Windsor IW, Tong P, Lavidor O, Moghaddam AS, McKay LGA, Gautam A, Chen Y, MacDonald EA, Yoo DK, Griffiths A *et al*: **Antibodies induced by an ancestral SARS-CoV-2 strain that cross-neutralize variants from Alpha to Omicron BA.1.** *Sci Immunol* 2022, **7**(74):eabo3425.
406. Li M, Ren Y, Aw ZQ, Chen B, Yang Z, Lei Y, Cheng L, Liang Q, Hong J, Yang Y *et al*: **Broadly neutralizing and protective nanobodies against SARS-CoV-2 Omicron subvariants BA.1, BA.2, and BA.4/5 and diverse sarbecoviruses.** *Nat Commun* 2022, **13**(1):7957.

407. Chi X, Guo Y, Zhang G, Sun H, Zhang J, Li M, Chen Z, Han J, Zhang Y, Zhang X *et al*: **Broadly neutralizing antibodies against Omicron-included SARS-CoV-2 variants induced by vaccination.** *Signal Transduct Target Ther* 2022, **7**(1):139.
408. Zupancic JM, Desai AA, Schardt JS, Pornnoppadol G, Makowski EK, Smith MD, Kennedy AA, Garcia de Mattos Barbosa M, Cascalho M, Lanigan TM *et al*: **Directed evolution of potent neutralizing nanobodies against SARS-CoV-2 using CDR-swapping mutagenesis.** *Cell Chem Biol* 2021, **28**(9):1379-1388.e1377.
409. Zhao S, Zhang H, Yang X, Zhang H, Chen Y, Zhan Y, Zhang X, Jiang R, Liu M, Liu L *et al*: **Identification of potent human neutralizing antibodies against SARS-CoV-2 implications for development of therapeutics and prophylactics.** *Nat Commun* 2021, **12**(1):4887.
410. Mast FD, Fridy PC, Ketaren NE, Wang J, Jacobs EY, Olivier JP, Sanyal T, Molloy KR, Schmidt F, Rutkowska M *et al*: **Highly synergistic combinations of nanobodies that target SARS-CoV-2 and are resistant to escape.** *Elife* 2021, **10**:e73027.
411. Suryadevara N, Shrihari S, Gilchuk P, VanBlargan LA, Binshtein E, Zost SJ, Nargi RS, Sutton RE, Winkler ES, Chen EC *et al*: **Neutralizing and protective human monoclonal antibodies recognizing the N-terminal domain of the SARS-CoV-2 spike protein.** *Cell* 2021, **184**(9):2316-2331.e2315.
412. Su W, Sia SF, Schmitz AJ, Bricker TL, Starr TN, Greaney AJ, Turner JS, Mohammed BM, Liu Z, Choy KT *et al*: **Neutralizing Monoclonal Antibodies That Target the Spike Receptor Binding Domain Confer Fc Receptor-Independent Protection against SARS-CoV-2 Infection in Syrian Hamsters.** *mBio* 2021, **12**(5):e0239521.
413. Wang S, Sun H, Zhang Y, Yuan L, Wang Y, Zhang T, Wang S, Zhang J, Yu H, Xiong H *et al*: **Three SARS-CoV-2 antibodies provide broad and synergistic neutralization against variants of concern, including Omicron.** *Cell Rep* 2022, **39**(8):110862.
414. Cerutti G, Guo Y, Wang P, Nair MS, Wang M, Huang Y, Yu J, Liu L, Katsamba PS, Bahna F *et al*: **Neutralizing antibody 5-7 defines a distinct site of vulnerability in SARS-CoV-2 spike N-terminal domain.** *Cell Rep* 2021, **37**(5):109928.
415. Ma H, Zeng W, Meng X, Huang X, Yang Y, Zhao D, Zhou P, Wang X, Zhao C, Sun Y *et al*: **Potent Neutralization of SARS-CoV-2 by Hetero-bivalent Alpaca Nanobodies Targeting the Spike Receptor-Binding Domain.** *J Virol* 2021, **95**(10):e02438-02420.
416. Li CJ, Chao TL, Chang TY, Hsiao CC, Lu DC, Chiang YW, Lai GC, Tsai YM, Fang JT, Jeong S *et al*: **Neutralizing Monoclonal Antibodies Inhibit SARS-CoV-2 Infection through Blocking Membrane Fusion.** *Microbiol Spectr* 2022, **10**(2):e0181421.
417. Fu D, Zhang G, Wang Y, Zhang Z, Hu H, Shen S, Wu J, Li B, Li X, Fang Y *et al*: **Structural basis for SARS-CoV-2 neutralizing antibodies with novel binding epitopes.** *PLoS Biol* 2021, **19**(5):e3001209.
418. Su SC, Yang TJ, Yu PY, Liang KH, Chen WY, Yang CW, Lin HT, Wang MJ, Lu RM, Tso HC *et al*: **Structure-guided antibody cocktail for prevention and treatment of COVID-19.** *PLoS Pathog* 2021, **17**(10):e1009704.
419. Ahmad J, Jiang J, Boyd LF, Zehner A, Huang R, Xia D, Natarajan K, Margulies DH: **Structures of synthetic nanobody-SARS-CoV-2 receptor-binding domain complexes reveal distinct sites of interaction.** *J Biol Chem* 2021, **297**(4):101202.
420. Kramer KJ, Johnson NV, Shiakolas AR, Suryadevara N, Periasamy S, Raju N, Williams JK, Wrapp D, Zost SJ, Walker LM *et al*: **Potent neutralization of SARS-CoV-2 variants of concern by an antibody with an uncommon genetic signature and structural mode of spike recognition.** *Cell Rep* 2021, **37**(1):109784.
421. Errico JM, Zhao H, Chen RE, Liu Z, Case JB, Ma M, Schmitz AJ, Rau MJ, Fitzpatrick JAJ, Shi PY *et al*: **Structural mechanism of SARS-CoV-2 neutralization by two murine antibodies targeting the RBD.** *Cell Rep* 2021, **37**(4):109881.
422. Kaku Y, Kuwata T, Zahid HM, Hashiguchi T, Noda T, Kuramoto N, Biswas S, Matsumoto K, Shimizu M, Kawanami Y *et al*: **Resistance of SARS-CoV-2 variants to neutralization by antibodies induced in convalescent patients with COVID-19.** *Cell Rep* 2021, **36**(2):109385.
423. Planchais C, Fernandez I, Bruel T, de Melo GD, Prot M, Beretta M, Guardado-Calvo P, Dufloo J, Molinos-Albert LM, Backovic M *et al*: **Potent human broadly SARS-CoV-2-neutralizing IgA and IgG antibodies effective against Omicron BA.1 and BA.2.** *J Exp Med* 2022, **219**(7):e20220638.
424. Li S, Wu J, Jiang W, He H, Zhou Y, Wu W, Gao Y, Xie M, Xia A, He J *et al*: **Characterization of cross-reactive monoclonal antibodies against SARS-CoV-1 and SARS-CoV-2: implication for rational design and development of pan-sarbecovirus vaccines and neutralizing antibodies.** *J Med Virol* 2022.

425. Zou J, Li L, Zheng P, Liang W, Hu S, Zhou S, Wang Y, Zhao J, Yuan D, Liu L *et al*: **Ultrapotent neutralizing antibodies against SARS-CoV-2 with a high degree of mutation resistance.** *J Clin Invest* 2022, **132**(4):e154987.
426. Chi X, Zhang X, Pan S, Yu Y, Shi Y, Lin T, Duan H, Liu X, Chen W, Yang X *et al*: **An ultrapotent RBD-targeted biparatopic nanobody neutralizes broad SARS-CoV-2 variants.** *Signal Transduct Target Ther* 2022, **7**(1):44.
427. Wagner TR, Schnepf D, Beer J, Ruetalo N, Klingel K, Kaiser PD, Junker D, Sauter M, Traenkle B, Frecot DI *et al*: **Biparatopic nanobodies protect mice from lethal challenge with SARS-CoV-2 variants of concern.** *EMBO Rep* 2022, **23**(2):e53865.
428. Guttler T, Aksu M, Dickmanns A, Stegmann KM, Gregor K, Rees R, Taxer W, Rymarenko O, Schunemann J, Dienemann C *et al*: **Neutralization of SARS-CoV-2 by highly potent, hyperthermostable, and mutation-tolerant nanobodies.** *EMBO J* 2021, **40**(19):e107985.
429. Li T, Cai H, Zhao Y, Li Y, Lai Y, Yao H, Liu LD, Sun Z, van Vliissingen MF, Kuiken T *et al*: **Uncovering a conserved vulnerability site in SARS-CoV-2 by a human antibody.** *EMBO Mol Med* 2021, **13**(12):e14544.
430. Zhao S, Liu F, Qiu S, Lan Q, Wu Y, Xu W, Ke J, Yang J, Liu X, Wang K *et al*: **A core epitope targeting antibody of SARS-CoV-2.** *Protein Cell* 2023, **14**(1):74-78.
431. Meng L, Zha J, Zhou B, Cao L, Jiang C, Zhu Y, Li T, Lu L, Zhang J, Yang H *et al*: **A Spike-destructing human antibody effectively neutralizes Omicron-included SARS-CoV-2 variants with therapeutic efficacy.** *PLoS Pathog* 2023, **19**(1):e1011085.
432. Rouet R, Henry JY, Johansen MD, Sobti M, Balachandran H, Langley DB, Walker GJ, Lenthall H, Jackson J, Ubiparipovic S *et al*: **Broadly neutralizing SARS-CoV-2 antibodies through epitope-based selection from convalescent patients.** *Nat Commun* 2023, **14**(1):687.
433. Bianchini F, Crivelli V, Abernathy ME, Guerra C, Palus M, Muri J, Marcotte H, Piralla A, Pedotti M, De Gasparo R *et al*: **Human neutralizing antibodies to cold linear epitopes and subdomain 1 of the SARS-CoV-2 spike glycoprotein.** *Sci Immunol* 2023:eade0958.
434. Chen WH, Hajduczyk A, Martinez EJ, Bai H, Matz H, Hill TM, Lewitus E, Chang WC, Dawit L, Peterson CE *et al*: **Shark nanobodies with potent SARS-CoV-2 neutralizing activity and broad sarbecovirus reactivity.** *Nat Commun* 2023, **14**(1):580.
435. Luo M, Zhou B, Reddem ER, Tang B, Chen B, Zhou R, Liu H, Liu L, Katsamba PS, Au KK *et al*: **Structural insights into broadly neutralizing antibodies elicited by hybrid immunity against SARS-CoV-2.** *Emerg Microbes Infect* 2023, **12**(1):2146538.
436. Monteil V, Dyczynski M, Lauschke VM, Kwon H, Wirnsberger G, Youhanna S, Zhang H, Slutsky AS, Hurtado Del Pozo C, Horn M *et al*: **Human soluble ACE2 improves the effect of remdesivir in SARS-CoV-2 infection.** *EMBO Mol Med* 2021, **13**(1):e13426.
437. Cao L, Goresnik I, Coventry B, Case JB, Miller L, Kozodoy L, Chen RE, Carter L, Walls AC, Park YJ *et al*: **De novo design of picomolar SARS-CoV-2 miniprotein inhibitors.** *Science* 2020, **370**(6515):426-431.
438. Xiao T, Lu J, Zhang J, Johnson RI, McKay LGA, Storm N, Lavine CL, Peng H, Cai Y, Rits-Volloch S *et al*: **A trimeric human angiotensin-converting enzyme 2 as an anti-SARS-CoV-2 agent.** *Nat Struct Mol Biol* 2021, **28**(2):202-209.
439. Glasgow A, Glasgow J, Limonta D, Solomon P, Lui I, Zhang Y, Nix MA, Rettko NJ, Zha S, Yamin R *et al*: **Engineered ACE2 receptor traps potently neutralize SARS-CoV-2.** *Proc Natl Acad Sci U S A* 2020, **117**(45):28046-28055.
440. Kayabolen A, Akcan U, Ozturan D, Ulbegi-Polat H, Sahin GN, Pinarbasi-Degirmenci N, Bayraktar C, Soyler G, Sarayloo E, Nurtop E *et al*: **Protein Scaffold-Based Multimerization of Soluble ACE2 Efficiently Blocks SARS-CoV-2 Infection In Vitro and In Vivo.** *Adv Sci (Weinh)* 2022, **9**(27):e2201294.
441. Karoyan P, Vieillard V, Gomez-Morales L, Odile E, Guihot A, Luyt CE, Denis A, Grondin P, Lequin O: **Human ACE2 peptide-mimics block SARS-CoV-2 pulmonary cells infection.** *Commun Biol* 2021, **4**(1):197.
442. Wang G, Yang ML, Duan ZL, Liu FL, Jin L, Long CB, Zhang M, Tang XP, Xu L, Li YC *et al*: **Dalbavancin binds ACE2 to block its interaction with SARS-CoV-2 spike protein and is effective in inhibiting SARS-CoV-2 infection in animal models.** *Cell Res* 2021, **31**(1):17-24.
443. Shin YH, Jeong K, Lee J, Lee HJ, Yim J, Kim J, Kim S, Park SB: **Inhibition of ACE2-Spike Interaction by an ACE2 Binder Suppresses SARS-CoV-2 Entry.** *Angew Chem Int Ed Engl* 2022, **61**(11):e202115695.
444. Taha Z, Arulanandam R, Maznyi G, Godbout E, Carter-Timofte ME, Kurmasheva N, Reinert LS, Chen A, Crupi MJF, Boulton S *et al*: **Identification of FDA-approved bifonazole as a SARS-CoV-2 blocking agent following a bioreporter drug screen.** *Mol Ther* 2022,



- 30(9):2998-3016.
445. Li Z, Peng M, Chen P, Liu C, Hu A, Zhang Y, Peng J, Liu J, Li Y, Li W *et al*: **Imatinib and methazolamide ameliorate COVID-19-induced metabolic complications via elevating ACE2 enzymatic activity and inhibiting viral entry.** *Cell Metab* 2022, **34**(3):424-440.e427.
446. Oh CK, Nakamura T, Beutler N, Zhang X, Pina-Crespo J, Talantova M, Ghatak S, Trudler D, Carnevale LN, McKercher SR *et al*: **Targeted protein S-nitrosylation of ACE2 inhibits SARS-CoV-2 infection.** *Nat Chem Biol* 2022.
447. Yang J, Xiao Y, Lidsky PV, Wu CT, Bonser LR, Peng S, Garcia-Knight MA, Tassetto M, Chung CI, Li X *et al*: **Fluorogenic reporter enables identification of compounds that inhibit SARS-CoV-2.** *Nat Microbiol* 2023, **8**(1):121-134.
448. Du Y, Shi R, Zhang Y, Duan X, Li L, Zhang J, Wang F, Zhang R, Shen H, Wang Y *et al*: **A broadly neutralizing humanized ACE2-targeting antibody against SARS-CoV-2 variants.** *Nat Commun* 2021, **12**(1):5000.
449. Hoffmann M, Kleine-Weber H, Schroeder S, Kruger N, Herrler T, Erichsen S, Schiergens TS, Herrler G, Wu NH, Nitsche A *et al*: **SARS-CoV-2 Cell Entry Depends on ACE2 and TMPRSS2 and Is Blocked by a Clinically Proven Protease Inhibitor.** *Cell* 2020, **181**(2):271-280.e278.
450. Li K, Meyerholz DK, Bartlett JA, McCray PB, Jr.: **The TMPRSS2 Inhibitor Nafamostat Reduces SARS-CoV-2 Pulmonary Infection in Mouse Models of COVID-19.** *mBio* 2021, **12**(4):e0097021.
451. Leach DA, Mohr A, Giotis ES, Cil E, Isac AM, Yates LL, Barclay WS, Zwacka RM, Bevan CL, Brooke GN: **The antiandrogen enzalutamide downregulates TMPRSS2 and reduces cellular entry of SARS-CoV-2 in human lung cells.** *Nat Commun* 2021, **12**(1):4068.
452. Chen Y, Lear TB, Evankovich JW, Larsen MB, Lin B, Alfaras I, Kennerdell JR, Salminen L, Camarco DP, Lockwood KC *et al*: **A high-throughput screen for TMPRSS2 expression identifies FDA-approved compounds that can limit SARS-CoV-2 entry.** *Nat Commun* 2021, **12**(1):3907.
453. Shapira T, Monreal IA, Dion SP, Buchholz DW, Imbiakha B, Olmstead AD, Jager M, Desilets A, Gao G, Martins M *et al*: **A TMPRSS2 inhibitor acts as a pan-SARS-CoV-2 prophylactic and therapeutic.** *Nature* 2022, **605**(7909):340-348.
454. Sun YJ, Velez G, Parsons DE, Li K, Ortiz ME, Sharma S, McCray PB, Jr., Bassuk AG, Mahajan VB: **Structure-based phylogeny identifies avoralstat as a TMPRSS2 inhibitor that prevents SARS-CoV-2 infection in mice.** *J Clin Invest* 2021, **131**(10):e147973.
455. Fraser BJ, Beldar S, Seitova A, Hutchinson A, Mannar D, Li Y, Kwon D, Tan R, Wilson RP, Leopold K *et al*: **Structure and activity of human TMPRSS2 protease implicated in SARS-CoV-2 activation.** *Nat Chem Biol* 2022, **18**(9):963-971.
456. Mahoney M, Damalanka VC, Tartell MA, Chung DH, Lourenco AL, Pwee D, Mayer Bridwell AE, Hoffmann M, Voss J, Karmakar P *et al*: **A novel class of TMPRSS2 inhibitors potently block SARS-CoV-2 and MERS-CoV viral entry and protect human epithelial lung cells.** *Proc Natl Acad Sci U S A* 2021, **118**(43):e2108728118.
457. Hempel T, Elez K, Kruger N, Raich L, Shrimp JH, Danov O, Jonigk D, Braun A, Shen M, Hall MD *et al*: **Synergistic inhibition of SARS-CoV-2 cell entry by otamixaban and covalent protease inhibitors: pre-clinical assessment of pharmacological and molecular properties.** *Chem Sci* 2021, **12**(38):12600-12609.
458. Chen Y, Yang WH, Chen HF, Huang LM, Gao JY, Lin CW, Wang YC, Yang CS, Liu YL, Hou MH *et al*: **Tafenoquine and its derivatives as inhibitors for the severe acute respiratory syndrome coronavirus 2.** *J Biol Chem* 2022, **298**(3):101658.
459. Wettstein L, Weil T, Conzelmann C, Muller JA, Gross R, Hirschenberger M, Seidel A, Klute S, Zech F, Prelli Bozzo C *et al*: **Alpha-1 antitrypsin inhibits TMPRSS2 protease activity and SARS-CoV-2 infection.** *Nat Commun* 2021, **12**(1):1726.
460. Mao B, Le-Trilling VTK, Wang K, Mennerich D, Hu J, Zhao Z, Zheng J, Deng Y, Katschinski B, Xu S *et al*: **Obatoclox inhibits SARS-CoV-2 entry by altered endosomal acidification and impaired cathepsin and furin activity in vitro.** *Emerg Microbes Infect* 2022, **11**(1):483-497.
461. Zhao MM, Zhu Y, Zhang L, Zhong G, Tai L, Liu S, Yin G, Lu J, He Q, Li MJ *et al*: **Novel cleavage sites identified in SARS-CoV-2 spike protein reveal mechanism for cathepsin L-facilitated viral infection and treatment strategies.** *Cell Discov* 2022, **8**(1):53.
462. Mellott DM, Tseng CT, Drelich A, Fajtova P, Chenna BC, Kostomiris DH, Hsu J, Zhu J, Taylor ZW, Kocurek KI *et al*: **A Clinical-Stage Cysteine Protease Inhibitor blocks SARS-CoV-2 Infection of Human and Monkey Cells.** *ACS Chem Biol* 2021, **16**(4):642-650.

463. Cheng YW, Chao TL, Li CL, Chiu MF, Kao HC, Wang SH, Pang YH, Lin CH, Tsai YM, Lee WH *et al*: **Furin Inhibitors Block SARS-CoV-2 Spike Protein Cleavage to Suppress Virus Production and Cytopathic Effects.** *Cell Rep* 2020, **33**(2):108254.
464. Riva L, Yuan S, Yin X, Martin-Sancho L, Matsunaga N, Pache L, Burgstaller-Muehlbacher S, De Jesus PD, Teriete P, Hull MV *et al*: **Discovery of SARS-CoV-2 antiviral drugs through large-scale compound repurposing.** *Nature* 2020, **586**(7827):113-119.
465. Bouhaddou M, Memon D, Meyer B, White KM, Rezelj VV, Correa Marrero M, Polacco BJ, Melnyk JE, Ulferts S, Kaake RM *et al*: **The Global Phosphorylation Landscape of SARS-CoV-2 Infection.** *Cell* 2020, **182**(3):685-712.e619.
466. Liu X, Verma A, Garcia G, Jr., Ramage H, Lucas A, Myers RL, Michaelson JJ, Coryell W, Kumar A, Charney AW *et al*: **Targeting the coronavirus nucleocapsid protein through GSK-3 inhibition.** *Proc Natl Acad Sci U S A* 2021, **118**(42):e2113401118.
467. Li C, Chu H, Liu X, Chiu MC, Zhao X, Wang D, Wei Y, Hou Y, Shuai H, Cai J *et al*: **Human coronavirus dependency on host heat shock protein 90 reveals an antiviral target.** *Emerg Microbes Infect* 2020, **9**(1):2663-2672.
468. Braga L, Ali H, Secco I, Chiavacci E, Neves G, Goldhill D, Penn R, Jimenez-Guardeno JM, Ortega-Prieto AM, Bussani R *et al*: **Drugs that inhibit TMEM16 proteins block SARS-CoV-2 spike-induced syncytia.** *Nature* 2021, **594**(7861):88-93.
469. Sim JR, Shin DH, Park PG, Park SH, Bae JY, Lee Y, Kang DY, Kim YJ, Aum S, Noh SH *et al*: **Amelioration of SARS-CoV-2 infection by ANO6 phospholipid scramblase inhibition.** *Cell Rep* 2022, **40**(3):111117.
470. Kratzel A, Kelly JN, V'Kovski P, Portmann J, Bruggemann Y, Todt D, Ebert N, Shrestha N, Plattet P, Staab-Weijnitz CA *et al*: **A genome-wide CRISPR screen identifies interactors of the autophagy pathway as conserved coronavirus targets.** *PLoS Biol* 2021, **19**(12):e3001490.
471. Xiong R, Zhang L, Li S, Sun Y, Ding M, Wang Y, Zhao Y, Wu Y, Shang W, Jiang X *et al*: **Novel and potent inhibitors targeting DHODH are broad-spectrum antivirals against RNA viruses including newly-emerged coronavirus SARS-CoV-2.** *Protein Cell* 2020, **11**(10):723-739.
472. Luban J, Sattler RA, Muhlberger E, Graci JD, Cao L, Weetall M, Trotta C, Colacino JM, Bavari S, Strambio-De-Castillia C *et al*: **The DHODH inhibitor PTC299 arrests SARS-CoV-2 replication and suppresses induction of inflammatory cytokines.** *Virus Res* 2021, **292**:198246.
473. Hahn F, Wangen C, Hage S, Peter AS, Dobler G, Hurst B, Julander J, Fuchs J, Ruzsics Z, Uberla K *et al*: **IMU-838, a Developmental DHODH Inhibitor in Phase II for Autoimmune Disease, Shows Anti-SARS-CoV-2 and Broad-Spectrum Antiviral Efficacy In Vitro.** *Viruses* 2020, **12**(12):1394.
474. Schultz DC, Johnson RM, Ayyanathan K, Miller J, Whig K, Kamalia B, Dittmar M, Weston S, Hammond HL, Dillen C *et al*: **Pyrimidine inhibitors synergize with nucleoside analogues to block SARS-CoV-2.** *Nature* 2022, **604**(7904):134-140.
475. Demarest JF, Kienle M, Boytz R, Ayres M, Kim EJ, Patten JJ, Chung D, Gandhi V, Davey RA, Sykes DB *et al*: **Brequinar and dipyridamole in combination exhibits synergistic antiviral activity against SARS-CoV-2 in vitro: Rationale for a host-acting antiviral treatment strategy for COVID-19.** *Antiviral Res* 2022, **206**:105403.
476. White KM, Rosales R, Yildiz S, Kehrer T, Miorin L, Moreno E, Jangra S, Uccellini MB, Rathnasinghe R, Coughlan L *et al*: **Plitidepsin has potent preclinical efficacy against SARS-CoV-2 by targeting the host protein eEF1A.** *Science* 2021, **371**(6532):926-931.
477. Biering SB, Van Dis E, Wehri E, Yamashiro LH, Nguyenla X, Dugast-Darzacq C, Graham TGW, Stroumza JR, Golovkine GR, Roberts AW *et al*: **Screening a Library of FDA-Approved and Bioactive Compounds for Antiviral Activity against SARS-CoV-2.** *ACS Infect Dis* 2021, **7**(8):2337-2351.
478. Schloer S, Brunotte L, Goretzko J, Mecate-Zambrano A, Korthals N, Gerke V, Ludwig S, Rescher U: **Targeting the endolysosomal host-SARS-CoV-2 interface by clinically licensed functional inhibitors of acid sphingomyelinase (FIASMA) including the antidepressant fluoxetine.** *Emerg Microbes Infect* 2020, **9**(1):2245-2255.
479. Gassen NC, Papies J, Bajaj T, Emanuel J, Dethloff F, Chua RL, Trimpert J, Heinemann N, Niemeyer C, Weege F *et al*: **SARS-CoV-2-mediated dysregulation of metabolism and autophagy uncovers host-targeting antivirals.** *Nat Commun* 2021, **12**(1):3818.
480. Geng J, Chen L, Yuan Y, Wang K, Wang Y, Qin C, Wu G, Chen R, Zhang Z, Wei D *et al*: **CD147 antibody specifically and effectively inhibits infection and cytokine storm of SARS-CoV-2 and its variants delta, alpha, beta, and gamma.** *Signal Transduct Target Ther* 2021, **6**(1):347.

481. Samelson AJ, Tran QD, Robinot R, Carrau L, Rezelj VV, Kain AM, Chen M, Ramadoss GN, Guo X, Lim SA *et al*: **BRD2 inhibition blocks SARS-CoV-2 infection by reducing transcription of the host cell receptor ACE2.** *Nat Cell Biol* 2022, **24**(1):24-34.
482. Mukherjee R, Bhattacharya A, Bojkova D, Mehdipour AR, Shin D, Khan KS, Hei-Yin Cheung H, Wong KB, Ng WL, Cinatl J *et al*: **Famotidine inhibits toll-like receptor 3-mediated inflammatory signaling in SARS-CoV-2 infection.** *J Biol Chem* 2021, **297**(2):100925.
483. Su S, Chen J, Wang Y, Wong LM, Zhu Z, Jiang G, Liu P: **Lenalidomide downregulates ACE2 protein abundance to alleviate infection by SARS-CoV-2 spike protein conditioned pseudoviruses.** *Signal Transduct Target Ther* 2021, **6**(1):182.
484. Yang X, Dickmader RJ, Bayati A, Taft-Benz SA, Smith JL, Wells CI, Madden EA, Brown JW, Lenarcic EM, Yount BL, Jr. *et al*: **Host Kinase CSNK2 is a Target for Inhibition of Pathogenic SARS-like beta-Coronaviruses.** *ACS Chem Biol* 2022, **17**(7):1937-1950.
485. Maarifi G, Martin MF, Zebboudj A, Boulay A, Nouaux P, Fernandez J, Lagisquet J, Garcin D, Gaudin R, Arhel NJ *et al*: **Identifying enhancers of innate immune signaling as broad-spectrum antivirals active against emerging viruses.** *Cell Chem Biol* 2022, **29**(7):1113-1125.e1116.
486. Klann K, Bojkova D, Tascher G, Ciesek S, Munch C, Cinatl J: **Growth Factor Receptor Signaling Inhibition Prevents SARS-CoV-2 Replication.** *Mol Cell* 2020, **80**(1):164-174.e164.
487. Chen CZ, Xu M, Pradhan M, Gorshkov K, Petersen JD, Straus MR, Zhu W, Shinn P, Guo H, Shen M *et al*: **Identifying SARS-CoV-2 Entry Inhibitors through Drug Repurposing Screens of SARS-S and MERS-S Pseudotyped Particles.** *ACS Pharmacol Transl Sci* 2020, **3**(6):1165-1175.
488. Shaban MS, Muller C, Mayr-Buro C, Weiser H, Meier-Soelch J, Albert BV, Weber A, Linne U, Hain T, Babayev I *et al*: **Multi-level inhibition of coronavirus replication by chemical ER stress.** *Nat Commun* 2021, **12**(1):5536.
489. Petitjean SJL, Chen W, Koehler M, Jimmidi R, Yang J, Mohammed D, Juniku B, Stanifer ML, Boulant S, Vincent SP *et al*: **Multivalent 9-O-Acetylated-sialic acid glycoclusters as potent inhibitors for SARS-CoV-2 infection.** *Nat Commun* 2022, **13**(1):2564.
490. Liu Q, Wang H, Zhang H, Sui L, Li L, Xu W, Du S, Hao P, Jiang Y, Chen J *et al*: **The global succinylation of SARS-CoV-2-infected host cells reveals drug targets.** *Proc Natl Acad Sci U S A* 2022, **119**(30):e2123065119.
491. Pohl MO, Martin-Sancho L, Ratnayake R, White KM, Riva L, Chen QY, Lieber G, Busnadiego I, Yin X, Lin S *et al*: **Sec61 Inhibitor Apratoxin S4 Potently Inhibits SARS-CoV-2 and Exhibits Broad-Spectrum Antiviral Activity.** *ACS Infect Dis* 2022, **8**(7):1265-1279.
492. Chu H, Hou Y, Yang D, Wen L, Shuai H, Yoon C, Shi J, Chai Y, Yuen TT, Hu B *et al*: **Coronaviruses exploit a host cysteine-aspartic protease for replication.** *Nature* 2022, **609**(7928):785-792.
493. Icho S, Rujas E, Muthuraman K, Tam J, Liang H, Landreth S, Liao M, Falzarano D, Julien JP, Melnyk RA: **Dual Inhibition of Vacuolar-ATPase and TMPRSS2 Is Required for Complete Blockade of SARS-CoV-2 Entry into Cells.** *Antimicrob Agents Chemother* 2022, **66**(7):e0043922.
494. Zaliani A, Vangeel L, Reinshagen J, Iaconis D, Kuzikov M, Keminer O, Wolf M, Ellinger B, Esposito F, Corona A *et al*: **Cytopathic SARS-CoV-2 screening on VERO-E6 cells in a large-scale repurposing effort.** *Sci Data* 2022, **9**(1):405.
495. Williams CG, Jureka AS, Silvas JA, Nicolini AM, Chvatal SA, Carlson-Stevermer J, Oki J, Holden K, Basler CF: **Inhibitors of VPS34 and fatty-acid metabolism suppress SARS-CoV-2 replication.** *Cell Rep* 2021, **36**(5):109479.
496. Jain S, Rego S, Park S, Liu Y, Parn S, Savsani K, Perlin DS, Dakshanamurthy S: **RNASeq profiling of COVID19-infected patients identified an EIF2AK2 inhibitor as a potent SARS-CoV-2 antiviral.** *Clin Transl Med* 2022, **12**(11):e1098.
497. Brevini T, Maes M, Webb GJ, John BV, Fuchs CD, Buescher G, Wang L, Griffiths C, Brown ML, Scott WE, 3rd *et al*: **FXR inhibition may protect from SARS-CoV-2 infection by reducing ACE2.** *Nature* 2023.
498. Nguyen LC, Yang D, Nicolaescu V, Best TJ, Gula H, Saxena D, Gabbard JD, Chen SN, Ohtsuki T, Friesen JB *et al*: **Cannabidiol inhibits SARS-CoV-2 replication through induction of the host ER stress and innate immune responses.** *Sci Adv* 2022, **8**(8):eabi6110.
499. Belouzard S, Machelart A, Sencio V, Vausselin T, Hoffmann E, Deboosere N, Rouille Y, Desmarests L, Seron K, Danneels A *et al*: **Clofoctol inhibits SARS-CoV-2 replication and reduces lung pathology in mice.** *PLoS Pathog* 2022, **18**(5):e1010498.
500. Son J, Huang S, Zeng Q, Bricker TL, Case JB, Zhou J, Zang R, Liu Z, Chang X, Darling TL *et*

- al: JIB-04 Has Broad-Spectrum Antiviral Activity and Inhibits SARS-CoV-2 Replication and Coronavirus Pathogenesis. mBio* 2022, **13**(1):e0337721.
501. Mirabelli C, Wotring JW, Zhang CJ, McCarty SM, Fursmidt R, Pretto CD, Qiao Y, Zhang Y, Frum T, Kadambi NS *et al: Morphological cell profiling of SARS-CoV-2 infection identifies drug repurposing candidates for COVID-19. Proc Natl Acad Sci U S A* 2021, **118**(36):e2105815118.
502. Garcia G, Jr., Sharma A, Ramaiah A, Sen C, Purkayastha A, Kohn DB, Parcels MS, Beck S, Kim H, Bakowski MA *et al: Antiviral drug screen identifies DNA-damage response inhibitor as potent blocker of SARS-CoV-2 replication. Cell Rep* 2021, **35**(1):108940.
503. Skendros P, Germanidis G, Mastellos DC, Antoniadou C, Gavriilidis E, Kalopitas G, Samakidou A, Liontos A, Chrysanthopoulou A, Ntinopoulou M *et al: Complement C3 inhibition in severe COVID-19 using compstatin AMY-101. Sci Adv* 2022, **8**(33):eabo2341.
504. Vitner EB, Achdout H, Avraham R, Politi B, Cherry L, Tamir H, Yahalom-Ronen Y, Paran N, Melamed S, Erez N *et al: Glucosylceramide synthase inhibitors prevent replication of SARS-CoV-2 and influenza virus. J Biol Chem* 2021, **296**:100470.
505. Xiang J, Lu M, Shi M, Cheng X, Kwakwa KA, Davis JL, Su X, Bakewell SJ, Zhang Y, Fontana F *et al: Heparanase Blockade as a Novel Dual-Targeting Therapy for COVID-19. J Virol* 2022, **96**(7):e0005722.
506. Limonta D, Dyna-Dagman L, Branton W, Mancinelli V, Makio T, Wozniak RW, Power C, Hobman TC: **Nodosome Inhibition as a Novel Broad-Spectrum Antiviral Strategy against Arboviruses, Enteroviruses, and SARS-CoV-2. Antimicrob Agents Chemother** 2021, **65**(8):e0049121.
507. Anderson DE, Cui J, Ye Q, Huang B, Tan Y, Jiang C, Zu W, Gong J, Liu W, Kim SY *et al: Orthogonal genome-wide screens of bat cells identify MTHFD1 as a target of broad antiviral therapy. Proc Natl Acad Sci U S A* 2021, **118**(39):e2104759118.
508. Qin C, Rao Y, Yuan H, Wang TY, Zhao J, Espinosa B, Liu Y, Zhang S, Savas AC, Liu Q *et al: SARS-CoV-2 couples evasion of inflammatory response to activated nucleotide synthesis. Proc Natl Acad Sci U S A* 2022, **119**(26):e2122897119.
509. Guo S, Lei X, Chang Y, Zhao J, Wang J, Dong X, Liu Q, Zhang Z, Wang L, Yi D *et al: SARS-CoV-2 hijacks cellular kinase CDK2 to promote viral RNA synthesis. Signal Transduct Target Ther* 2022, **7**(1):400.
510. Stone NE, Jaramillo SA, Jones AN, Vazquez AJ, Martz M, Versluis LM, Raniere MO, Nunnally HE, Zarn KE, Nottingham R *et al: Stenoparib, an Inhibitor of Cellular Poly(ADP-Ribose) Polymerase, Blocks Replication of the SARS-CoV-2 and HCoV-NL63 Human Coronaviruses In Vitro. mBio* 2021, **12**(1):e03495-03420.
511. Li Z, Yong H, Wang W, Gao Y, Wang P, Chen X, Lu J, Zheng J, Bai J: **GSK3326595 is a promising drug to prevent SARS-CoV-2 Omicron and other variants infection by inhibiting ACE2-R671 di-methylation. J Med Virol** 2023, **95**(1):e28158.
512. Kim DK, Weller B, Lin CW, Sheykhkarimli D, Knapp JJ, Dugied G, Zanzoni A, Pons C, Tofaute MJ, Maseko SB *et al: A proteome-scale map of the SARS-CoV-2-human contactome. Nat Biotechnol* 2023, **41**(1):140-149.
513. Karade SS, Franco EJ, Rojas AC, Hanrahan KC, Kolesnikov A, Yu W, MacKerell AD, Jr., Hill DC, Weber DJ, Brown AN *et al: Structure-Based Design of Potent Iminosugar Inhibitors of Endoplasmic Reticulum alpha-Glucosidase I with Anti-SARS-CoV-2 Activity. J Med Chem* 2023.
514. Group RC: **Aspirin in patients admitted to hospital with COVID-19 (RECOVERY): a randomised, controlled, open-label, platform trial. Lancet** 2022, **399**(10320):143-151.
515. INSPIRATION-S Investigators: **Atorvastatin versus placebo in patients with covid-19 in intensive care: randomized controlled trial. BMJ** 2022, **376**:e068407.
516. Principle Trial Collaborative Group: **Azithromycin for community treatment of suspected COVID-19 in people at increased risk of an adverse clinical course in the UK (PRINCIPLE): a randomised, controlled, open-label, adaptive platform trial. Lancet** 2021, **397**(10279):1063-1074.
517. Furtado RHM, Berwanger O, Fonseca HA, Correa TD, Ferraz LR, Lapa MG, Zampieri FG, Veiga VC, Azevedo LCP, Rosa RG *et al: Azithromycin in addition to standard of care versus standard of care alone in the treatment of patients admitted to the hospital with severe COVID-19 in Brazil (COALITION II): a randomised clinical trial. Lancet* 2020, **396**(10256):959-967.
518. Hinks TSC, Cureton L, Knight R, Wang A, Cane JL, Barber VS, Black J, Dutton SJ, Melhorn J, Jabeen M *et al: Azithromycin versus standard care in patients with mild-to-moderate*

- COVID-19 (ATOMIC2): an open-label, randomised trial.** *Lancet Respir Med* 2021, **9**(10):1130-1140.
519. Oldenburg CE, Pinsky BA, Brogdon J, Chen C, Ruder K, Zhong L, Nyatigo F, Cook CA, Hinterwirth A, Lebas E *et al*: **Effect of Oral Azithromycin vs Placebo on COVID-19 Symptoms in Outpatients With SARS-CoV-2 Infection: A Randomized Clinical Trial.** *JAMA* 2021, **326**(6):490-498.
520. Bowdish ME, Barkauskas CE, Overbey JR, Gottlieb RL, Osman K, Duggal A, Marks ME, Hupf J, Fernandes E, Leshnowar BG *et al*: **A Randomized Trial of Mesenchymal Stromal Cells for Moderate to Severe ARDS From COVID-19.** *Am J Respir Crit Care Med* 2023, **207**(3):261-270.
521. Caricchio R, Abbate A, Gordeev I, Meng J, Hsue PY, Neogi T, Arduino R, Fomina D, Bogdanov R, Stepanenko T *et al*: **Effect of Canakinumab vs Placebo on Survival Without Invasive Mechanical Ventilation in Patients Hospitalized With Severe COVID-19: A Randomized Clinical Trial.** *JAMA* 2021, **326**(3):230-239.
522. Kinoshita T, Shinoda M, Nishizaki Y, Shiraki K, Hirai Y, Kichikawa Y, Tsushima K, Sinkai M, Komura N, Yoshida K *et al*: **A multicenter, double-blind, randomized, parallel-group, placebo-controlled study to evaluate the efficacy and safety of camostat mesilate in patients with COVID-19 (CANDLE study).** *BMC Med* 2022, **20**(1):342.
523. Kim YS, Jeon SH, Kim J, Koh JH, Ra SW, Kim JW, Kim Y, Kim CK, Shin YC, Kang BD *et al*: **A Double-Blind, Randomized, Placebo-Controlled, Phase II Clinical Study To Evaluate the Efficacy and Safety of Camostat Mesylate (DWJ1248) in Adult Patients with Mild to Moderate COVID-19.** *Antimicrob Agents Chemother* 2023, **67**(1):e0045222.
524. Clemency BM, Varughese R, Gonzalez-Rojas Y, Morse CG, Phipatanakul W, Koster DJ, Blaiss MS: **Efficacy of Inhaled Ciclesonide for Outpatient Treatment of Adolescents and Adults With Symptomatic COVID-19: A Randomized Clinical Trial.** *JAMA Intern Med* 2022, **182**(1):42-49.
525. Ezer N, Belga S, Daneman N, Chan A, Smith BM, Daniels SA, Moran K, Besson C, Smyth LY, Bartlett SJ *et al*: **Inhaled and intranasal ciclesonide for the treatment of covid-19 in adult outpatients: CONTAIN phase II randomised controlled trial.** *BMJ* 2021, **375**:e068060.
526. Recovery Collaborative Group: **Colchicine in patients admitted to hospital with COVID-19 (RECOVERY): a randomised, controlled, open-label, platform trial.** *Lancet Respir Med* 2021, **9**(12):1419-1426.
527. Kosiborod MN, Esterline R, Furtado RHM, Oscarsson J, Gasparyan SB, Koch GG, Martinez F, Mukhtar O, Verma S, Chopra V *et al*: **Dapagliflozin in patients with cardiometabolic risk factors hospitalised with COVID-19 (DARE-19): a randomised, double-blind, placebo-controlled, phase 3 trial.** *Lancet Diabetes Endocrinol* 2021, **9**(9):586-594.
528. Criner GJ, Lang FM, Gottlieb RL, Mathews KS, Wang TS, Rice TW, Madduri D, Bellam S, Jeanfreau R, Case AH *et al*: **Anti-GM-CSF Monoclonal Antibody Gimsilumab for COVID-19 Pneumonia: A Randomized, Double-Blind, Placebo-Controlled Trial.** *Am J Respir Crit Care Med* 2022, **205**(11):1290-1299.
529. Patel J, Bass D, Beishuizen A, Bocca Ruiz X, Boughanmi H, Cahn A, Colombo H, Criner GJ, Davy K, de-Miguel-Diez J *et al*: **A Randomised trial of anti-GM-CSF Otilimab in severe COVID-19 pneumonia (OSCAR).** *Eur Respir J* 2023, **61**(2):2101870.
530. Accelerating Covid-19 Therapeutic Interventions Vaccines -6 Study Group, Naggie S: **Inhaled Fluticasone for Outpatient Treatment of Covid-19: A Decentralized, Placebo-controlled, Randomized, Platform Clinical Trial.** *medRxiv* 2022.
531. Kalil AC, Mehta AK, Patterson TF, Erdmann N, Gomez CA, Jain MK, Wolfe CR, Ruiz-Palacios GM, Kline S, Regalado Pineda J *et al*: **Efficacy of interferon beta-1a plus remdesivir compared with remdesivir alone in hospitalised adults with COVID-19: a double-blind, randomised, placebo-controlled, phase 3 trial.** *Lancet Respir Med* 2021, **9**(12):1365-1376.
532. Jagannathan P, Andrews JR, Bonilla H, Hedlin H, Jacobson KB, Balasubramanian V, Purington N, Kamble S, de Vries CR, Quintero O *et al*: **Peginterferon Lambda-1a for treatment of outpatients with uncomplicated COVID-19: a randomized placebo-controlled trial.** *Nat Commun* 2021, **12**(1):1967.
533. Aman J, Duijvelaar E, Botros L, Kianzad A, Schippers JR, Smeele PJ, Azhang S, Bartelink IH, Bayoumy AA, Bet PM *et al*: **Imatinib in patients with severe COVID-19: a randomised, double-blind, placebo-controlled, clinical trial.** *Lancet Respir Med* 2021, **9**(9):957-968.
534. Lopez-Medina E, Lopez P, Hurtado IC, Davalos DM, Ramirez O, Martinez E, Diazgranados JA, Onate JM, Chavarriaga H, Herrera S *et al*: **Effect of Ivermectin on Time to Resolution of Symptoms Among Adults With Mild COVID-19: A Randomized Clinical Trial.** *JAMA* 2021,

- 325(14):1426-1435.
535. Bramante CT, Huling JD, Tignanelli CJ, Buse JB, Liebovitz DM, Nicklas JM, Cohen K, Puskarich MA, Belani HK, Proper JL *et al*: **Randomized Trial of Metformin, Ivermectin, and Flvoxamine for Covid-19.** *N Engl J Med* 2022, **387**(7):599-610.
536. Naggie S, Boulware DR, Lindsell CJ, Stewart TG, Gentile N, Collins S, McCarthy MW, Jayaweera D, Castro M, Sulkowski M *et al*: **Effect of Ivermectin vs Placebo on Time to Sustained Recovery in Outpatients With Mild to Moderate COVID-19: A Randomized Clinical Trial.** *JAMA* 2022, **328**(16):1595-1603.
537. Reis G, Silva E, Silva DCM, Thabane L, Milagres AC, Ferreira TS, Dos Santos CVQ, Campos VHS, Nogueira AMR, de Almeida A *et al*: **Effect of Early Treatment with Ivermectin among Patients with Covid-19.** *N Engl J Med* 2022, **386**(18):1721-1731.
538. Labro G, Tubach F, Belin L, Dubost JL, Osman D, Muller G, Quenot JP, Da Silva D, Zarka J, Turpin M *et al*: **Nicotine patches in patients on mechanical ventilation for severe COVID-19: a randomized, double-blind, placebo-controlled, multicentre trial.** *Intensive Care Med* 2022, **48**(7):876-887.
539. Rocco PRM, Silva PL, Cruz FF, Melo-Junior MAC, Tierno P, Moura MA, De Oliveira LFG, Lima CC, Dos Santos EA, Junior WF *et al*: **Early use of nitazoxanide in mild COVID-19 disease: randomised, placebo-controlled trial.** *Eur Respir J* 2021, **58**(1):2003725.
540. de Alencar JCG, Moreira CL, Muller AD, Chaves CE, Fukuhara MA, da Silva EA, Miyamoto MFS, Pinto VB, Bueno CG, Lazar Neto F *et al*: **Double-blind, Randomized, Placebo-controlled Trial With N-acetylcysteine for Treatment of Severe Acute Respiratory Syndrome Caused by Coronavirus Disease 2019 (COVID-19).** *Clin Infect Dis* 2021, **72**(11):e736-e741.
541. Zhang F, Wei Y, He L, Zhang H, Hu Q, Yue H, He J, Dai H: **A trial of pirfenidone in hospitalized adult patients with severe coronavirus disease 2019.** *Chin Med J (Engl)* 2021, **135**(3):368-370.
542. WHO Solidarity Trial Consortium, Pan H, Peto R, Henao-Restrepo AM, Preziosi MP, Sathiyamoorthy V, Abdool Karim Q, Alejandria MM, Hernandez Garcia C, Kieny MP *et al*: **Repurposed Antiviral Drugs for Covid-19 - Interim WHO Solidarity Trial Results.** *N Engl J Med* 2021, **384**(6):497-511.
543. Han MK, Antila M, Ficker JH, Gordeev I, Guerrero A, Bernus AL, Roquilly A, Sifuentes-Osornio J, Tabak F, Teijeiro R *et al*: **Ruxolitinib in addition to standard of care for the treatment of patients admitted to hospital with COVID-19 (RUXCOVID): a randomised, double-blind, placebo-controlled, phase 3 trial.** *Lancet Rheumatol* 2022, **4**(5):e351-e361.
544. Waters M, McKinnell JA, Kalil AC, Martin GS, Buchman TG, Theess W, Yang X, Lekkerkerker AN, Staton T, Rosenberger CM *et al*: **Astegolimab or Efmardocokin Alfa in Patients With Severe COVID-19 Pneumonia: A Randomized, Phase 2 Trial.** *Crit Care Med* 2023, **51**(1):103-116.
545. Declercq J, Van Damme KFA, De Leeuw E, Maes B, Bosteels C, Tavernier SJ, De Buyser S, Colman R, Hites M, Verschelden G *et al*: **Effect of anti-interleukin drugs in patients with COVID-19 and signs of cytokine release syndrome (COV-AID): a factorial, randomised, controlled trial.** *Lancet Respir Med* 2021, **9**(12):1427-1438.
546. Sayad B, Khodarahmi R, Najafi F, Miladi R, Mohseni Afshar Z, Mansouri F, Rahimi Z, Shirvani M, Salimi M, Vaziri S *et al*: **Efficacy and safety of sofosbuvir/velpatasvir versus the standard of care in adults hospitalized with COVID-19: a single-centre, randomized controlled trial.** *J Antimicrob Chemother* 2021, **76**(8):2158-2167.
547. Mobarak S, Salasi M, Hormati A, Khodadadi J, Ziaee M, Abedi F, Ebrahimzadeh A, Azarkar Z, Mansour-Ghanaei F, Joukar F *et al*: **Evaluation of the effect of sofosbuvir and daclatasvir in hospitalized COVID-19 patients: a randomized double-blind clinical trial (DISCOVER).** *J Antimicrob Chemother* 2022, **77**(3):758-766.
548. Roozbeh F, Saedi M, Alizadeh-Navaei R, Hedayatizadeh-Omran A, Merat S, Wentzel H, Levi J, Hill A, Shamshirian A: **Sofosbuvir and daclatasvir for the treatment of COVID-19 outpatients: a double-blind, randomized controlled trial.** *J Antimicrob Chemother* 2021, **76**(3):753-757.
549. Montejano R, de la Calle-Prieto F, Velasco M, Guijarro C, Queiruga-Parada J, Jimenez-Gonzalez M, Gonzalez-Ruano P, Martinez P, Goikoetxea AJ, Ibarrola M *et al*: **Tenofovir Disoproxil Fumarate/Emtricitabine and Baricitinib for Patients at High Risk of Severe COVID-19: The PANCOVID Randomized Clinical Trial.** *Clin Infect Dis* 2023, **76**(3):e116-e125.
550. Polo R, Garcia-Albeniz X, Teran C, Morales M, Rial-Crestelo D, Garcinuno MA, Garcia Del

- Toro M, Hita C, Gomez-Sirvent JL, Buzon L *et al*: **Daily tenofovir disoproxil fumarate/emtricitabine and hydroxychloroquine for pre-exposure prophylaxis of COVID-19: a double-blind placebo-controlled randomized trial in healthcare workers.** *Clin Microbiol Infect* 2023, **29**(1):85-93.
551. Berger JS, Kornblith LZ, Gong MN, Reynolds HR, Cushman M, Cheng Y, McVerry BJ, Kim KS, Lopes RD, Atassi B *et al*: **Effect of P2Y12 Inhibitors on Survival Free of Organ Support Among Non-Critically Ill Hospitalized Patients With COVID-19: A Randomized Clinical Trial.** *JAMA* 2022, **327**(3):227-236.
552. Murai IH, Fernandes AL, Sales LP, Pinto AJ, Goessler KF, Duran CSC, Silva CBR, Franco AS, Macedo MB, Dalmolin HHH *et al*: **Effect of a Single High Dose of Vitamin D3 on Hospital Length of Stay in Patients With Moderate to Severe COVID-19: A Randomized Clinical Trial.** *JAMA* 2021, **325**(11):1053-1060.
553. Thomas S, Patel D, Bittel B, Wolski K, Wang Q, Kumar A, Il'Giovine ZJ, Mehra R, McWilliams C, Nissen SE *et al*: **Effect of High-Dose Zinc and Ascorbic Acid Supplementation vs Usual Care on Symptom Length and Reduction Among Ambulatory Patients With SARS-CoV-2 Infection: The COVID A to Z Randomized Clinical Trial.** *JAMA Netw Open* 2021, **4**(2):e210369.
554. Fogleman C, Cohen D, Mercier A, Farrell D, Rutz J, Bresz K, Vernon T: **A Pilot of a Randomized Control Trial of Melatonin and Vitamin C for Mild-to-Moderate COVID-19.** *J Am Board Fam Med* 2022, **35**(4):695-707.
555. ACTIV-3/TICO Study Group, Barkauskas C, Mylonakis E, Poulakou G, Young BE, Vock DM, Siegel L, Engen N, Grandits G, Mosaly NR *et al*: **Efficacy and Safety of Ensovibep for Adults Hospitalized With COVID-19 : A Randomized Controlled Trial.** *Ann Intern Med* 2022, **175**(9):1266-1274.
556. Jardine MJ, Kotwal SS, Bassi A, Hockham C, Jones M, Wilcox A, Pollock C, Burrell LM, McGree J, Rathore V *et al*: **Angiotensin receptor blockers for the treatment of covid-19: pragmatic, adaptive, multicentre, phase 3, randomised controlled trial.** *BMJ* 2022, **379**:e072175.
557. Youssef JG, Lavin P, Schoenfeld DA, Lee RA, Lenhardt R, Park DJ, Fernandez JP, Morganroth ML, Javitt JC, Jayaweera D: **The Use of IV Vasoactive Intestinal Peptide (Aviptadil) in Patients With Critical COVID-19 Respiratory Failure: Results of a 60-Day Randomized Controlled Trial.** *Crit Care Med* 2022, **50**(11):1545-1554.
558. Lou Y, Liu L, Yao H, Hu X, Su J, Xu K, Luo R, Yang X, He L, Lu X *et al*: **Clinical Outcomes and Plasma Concentrations of Baloxavir Marboxil and Favipiravir in COVID-19 Patients: An Exploratory Randomized, Controlled Trial.** *Eur J Pharm Sci* 2021, **157**:105631.
559. Puskarich MA, Cummins NW, Ingraham NE, Wacker DA, Reilkoff RA, Driver BE, Biros MH, Bellolio F, Chipman JG, Nelson AC *et al*: **A multi-center phase II randomized clinical trial of losartan on symptomatic outpatients with COVID-19.** *EClinicalMedicine* 2021, **37**:100957.
560. Puskarich MA, Ingraham NE, Merck LH, Driver BE, Wacker DA, Black LP, Jones AE, Fletcher CV, South AM, Murray TA *et al*: **Efficacy of Losartan in Hospitalized Patients With COVID-19-Induced Lung Injury: A Randomized Clinical Trial.** *JAMA Netw Open* 2022, **5**(3):e222735.
561. Mazeraud A, Jamme M, Mancusi RL, Latroche C, Megarbane B, Siami S, Zarka J, Moneger G, Santoli F, Argaud L *et al*: **Intravenous immunoglobulins in patients with COVID-19-associated moderate-to-severe acute respiratory distress syndrome (ICAR): multicentre, double-blind, placebo-controlled, phase 3 trial.** *Lancet Respir Med* 2022, **10**(2):158-166.
562. Rahmel T, Kraft F, Haberl H, Achtzehn U, Brandenburger T, Neb H, Jarczak D, Dietrich M, Magunia H, Zimmer F *et al*: **Intravenous IgM-enriched immunoglobulins in critical COVID-19: a multicentre propensity-weighted cohort study.** *Crit Care* 2022, **26**(1):204.
563. Kalfon P, Payen JF, Rousseau A, Chousterman B, Cachanado M, Tibi A, Audibert J, Depret F, Constantin JM, Weiss E *et al*: **Effect of intravenous almitrine on intubation or mortality in patients with COVID-19 acute hypoxemic respiratory failure: A multicentre, randomised, double-blind, placebo-controlled trial.** *EClinicalMedicine* 2022, **52**:101663.
564. Keir HR, Long MB, Abo-Leyah H, Giam YH, Vadiveloo T, Pembridge T, Hull RC, Delgado L, Band M, McLaren-Neil F *et al*: **Dipeptidyl peptidase-1 inhibition in patients hospitalised with COVID-19: a multicentre, double-blind, randomised, parallel-group, placebo-controlled trial.** *Lancet Respir Med* 2022, **10**(12):1119-1128.
